# Supplementary material
Source: PubMed Central journal article supplement (PMC4591205)
Supplement: NIHMS714063-supplement-Supp_TableS1-S12___FigureS1-S5.pdf [file NIHMS714063-supplement-Supp_TableS1-S12___FigureS1-S5.pdf]

**Figure S1.** Phylogenetic tree of 937 *NBS-LRR* genes from two cultivars (Nipponbare and 9311 of *Oryza sativa*) based on NBS domains. The tree was determined by the bootstrap NJ method with p-distance model by MEGA v5.02. The stability of internal branches was assessed by bootstrap analysis with 1,000 replicates. Clades are defined as these branches with >70% bootstrap values and at the first layer from the root. A clade can have one or more branches that also have >70% bootstrap values. The total numbers of clades, the 96 single-copy and 115 multi-copy clades, were counted only for Nipponbare; 9311 unique clades (64) were excluded. A multi-copy clade has at least two or more genes from one genome. Clades 1-10 indicated with blue-colors correspond to those in Supplementary Table 9. Red circles denote single- or multi-copy clades. Yellow or purple shadows denote that the cloned genes in this branch are all identified as resistant in this study, and purple shadows denote that the cloned genes in this branch are all identified as susceptible. The numbers in the green square box at each locus denote the total number of cloned genes, the sum of resistant and moderately resistant genes, and the number of susceptible genes. The red shadows indicate that resistant blast *R*-gene(s) have been reported previously in those branches.

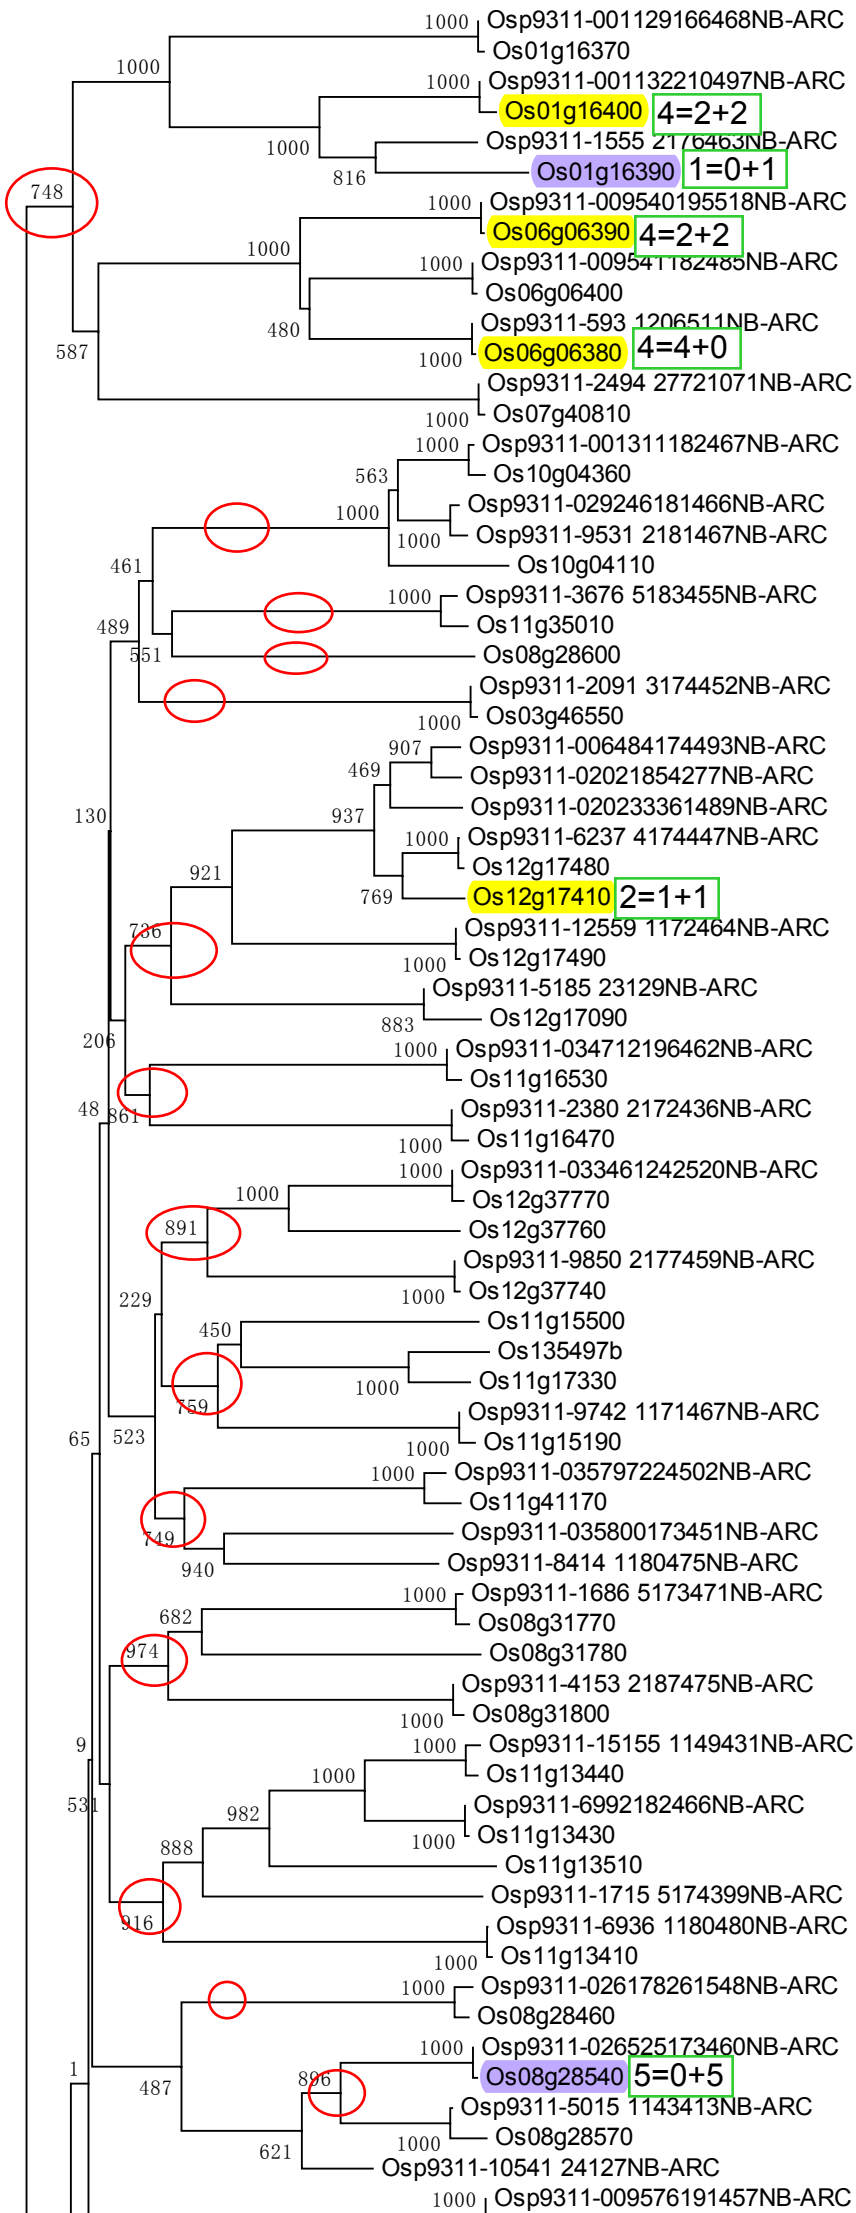

## Clade 1 in Table S9

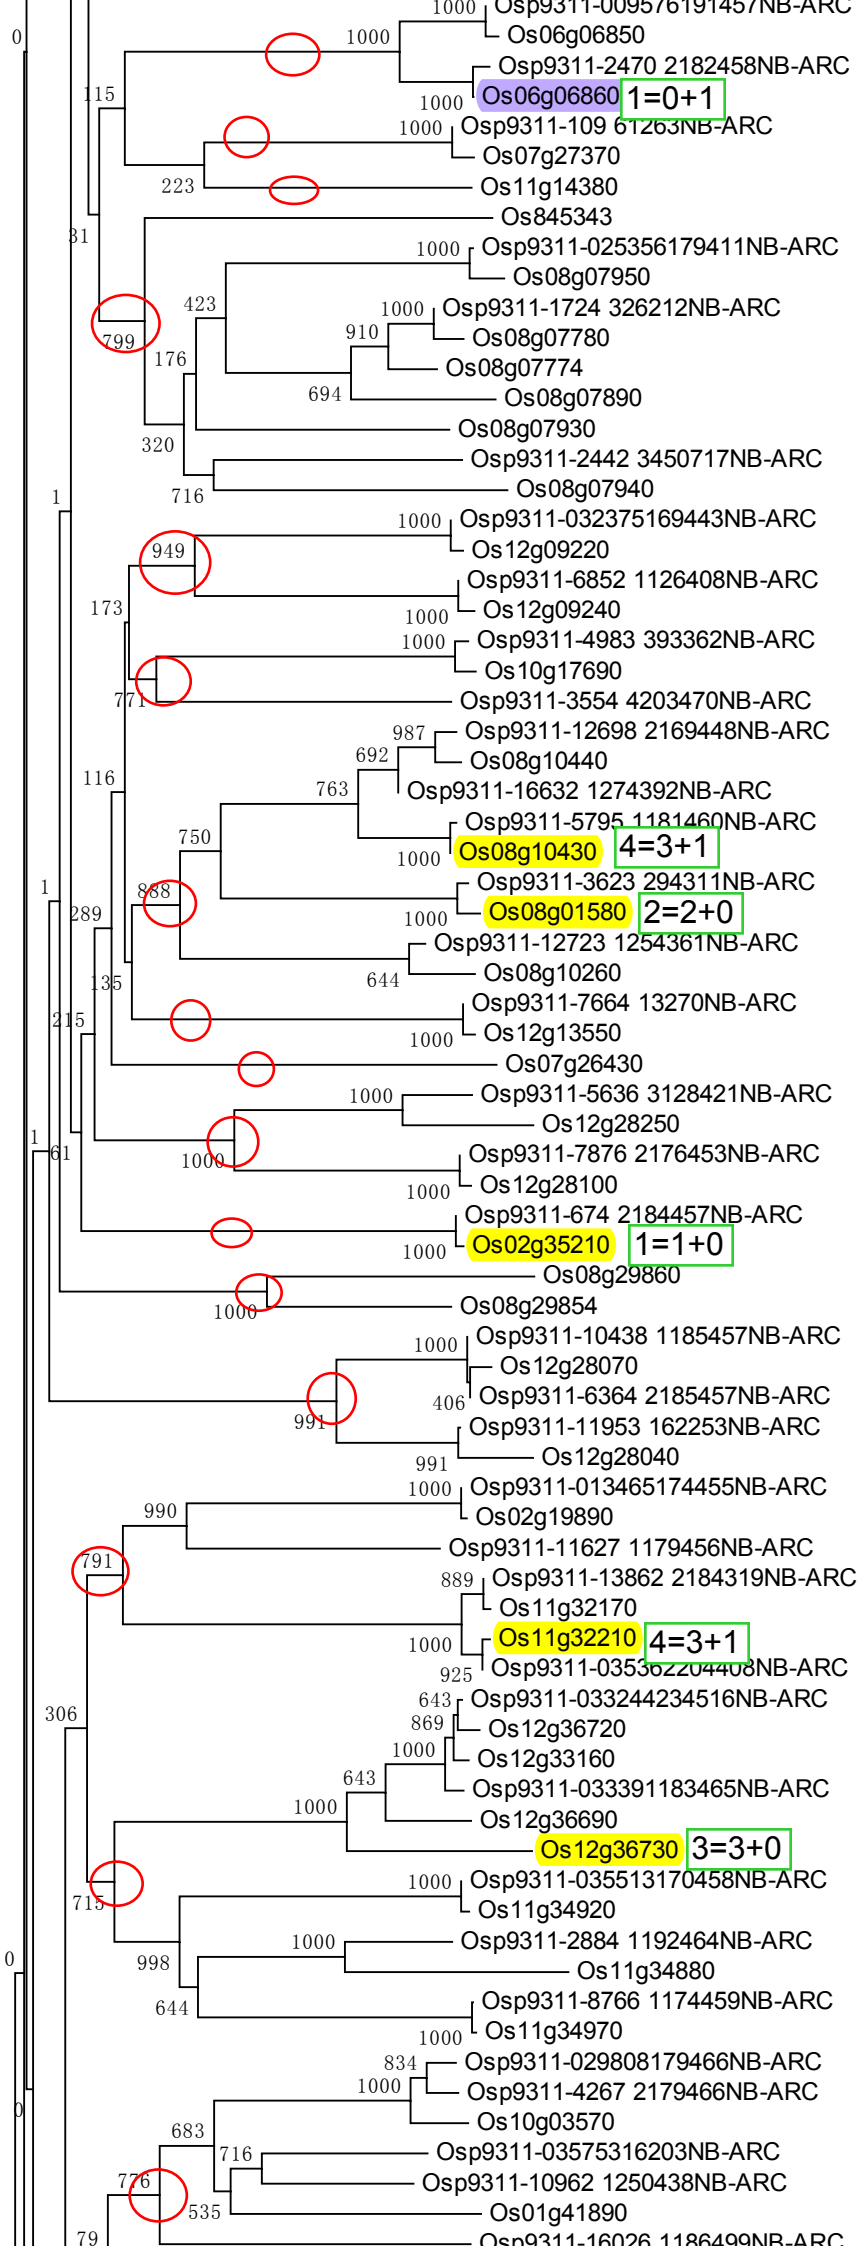

**Clade 2 in Table S9**

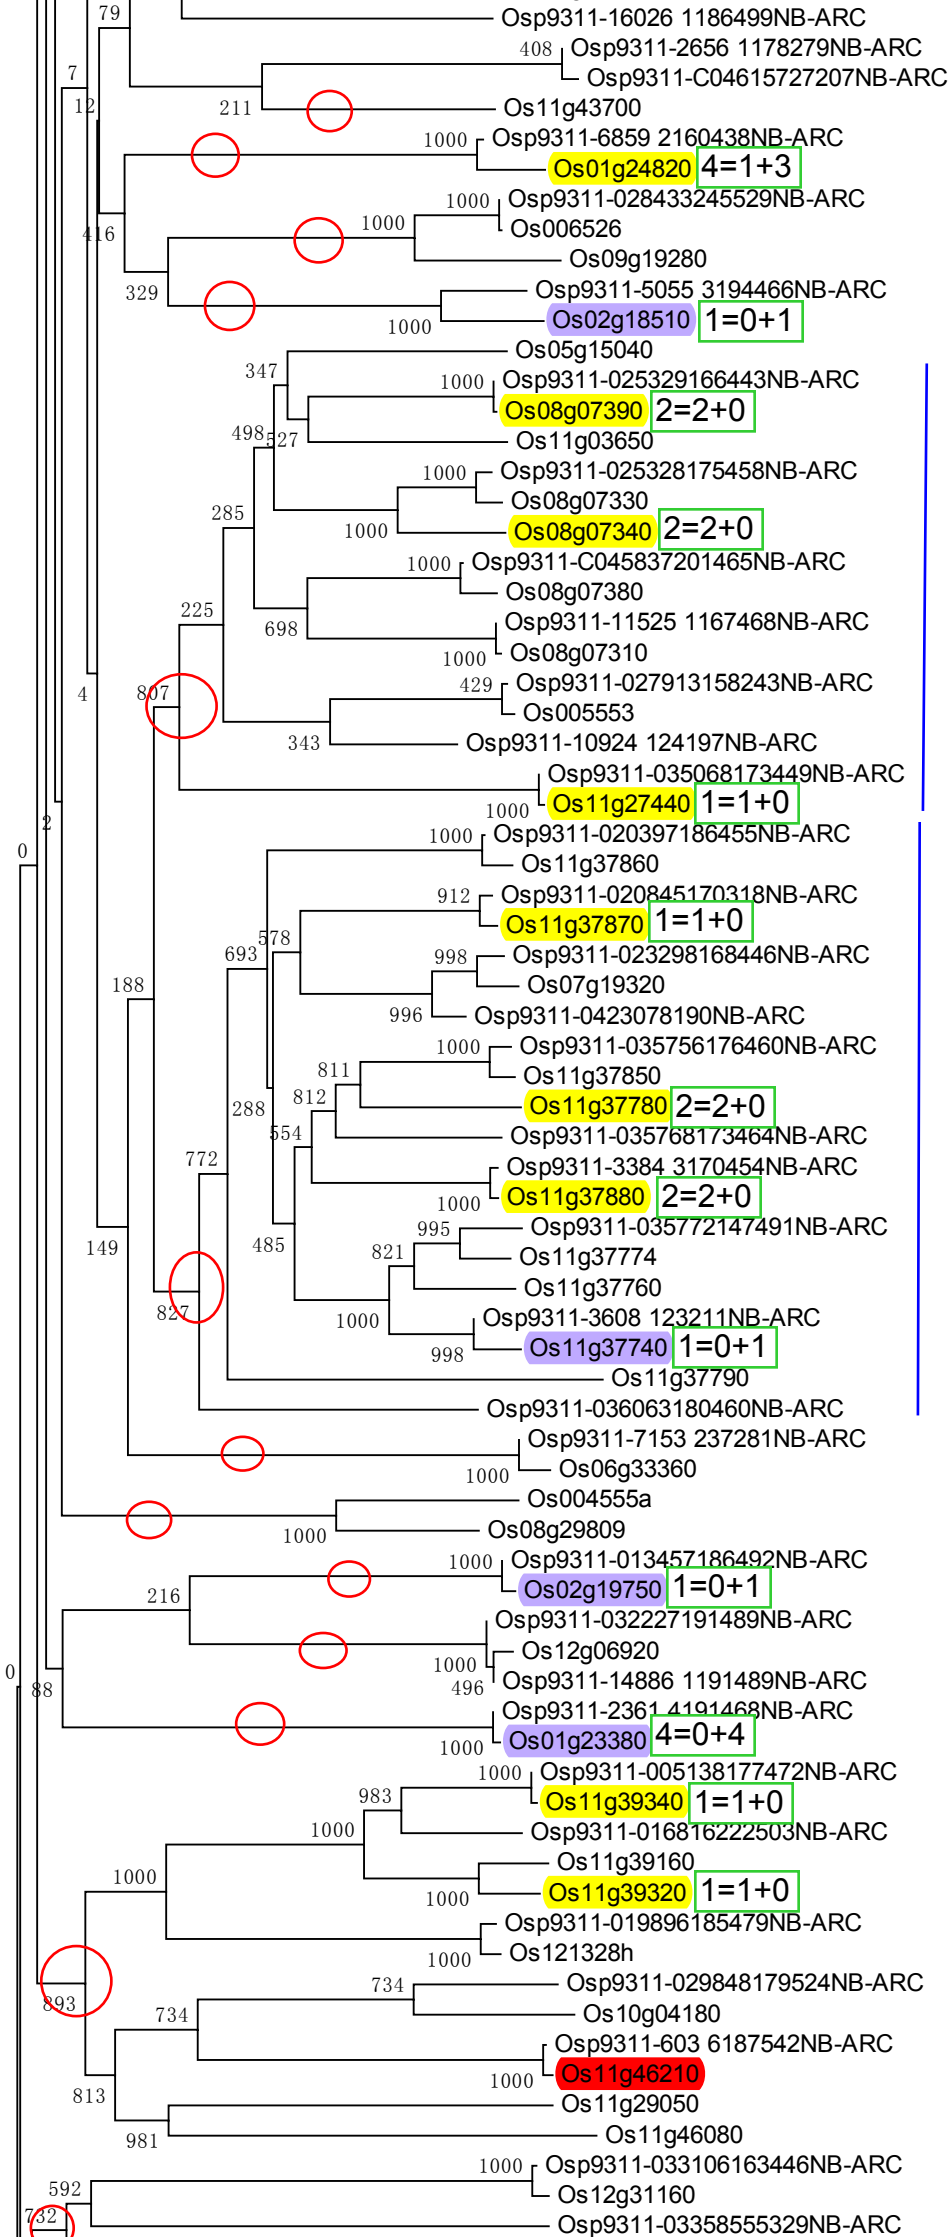

**Clade 3 in Table S9**

**Clade 4 in Table S9**

Pik, Pikm, Pikh loci (clade)

(3)

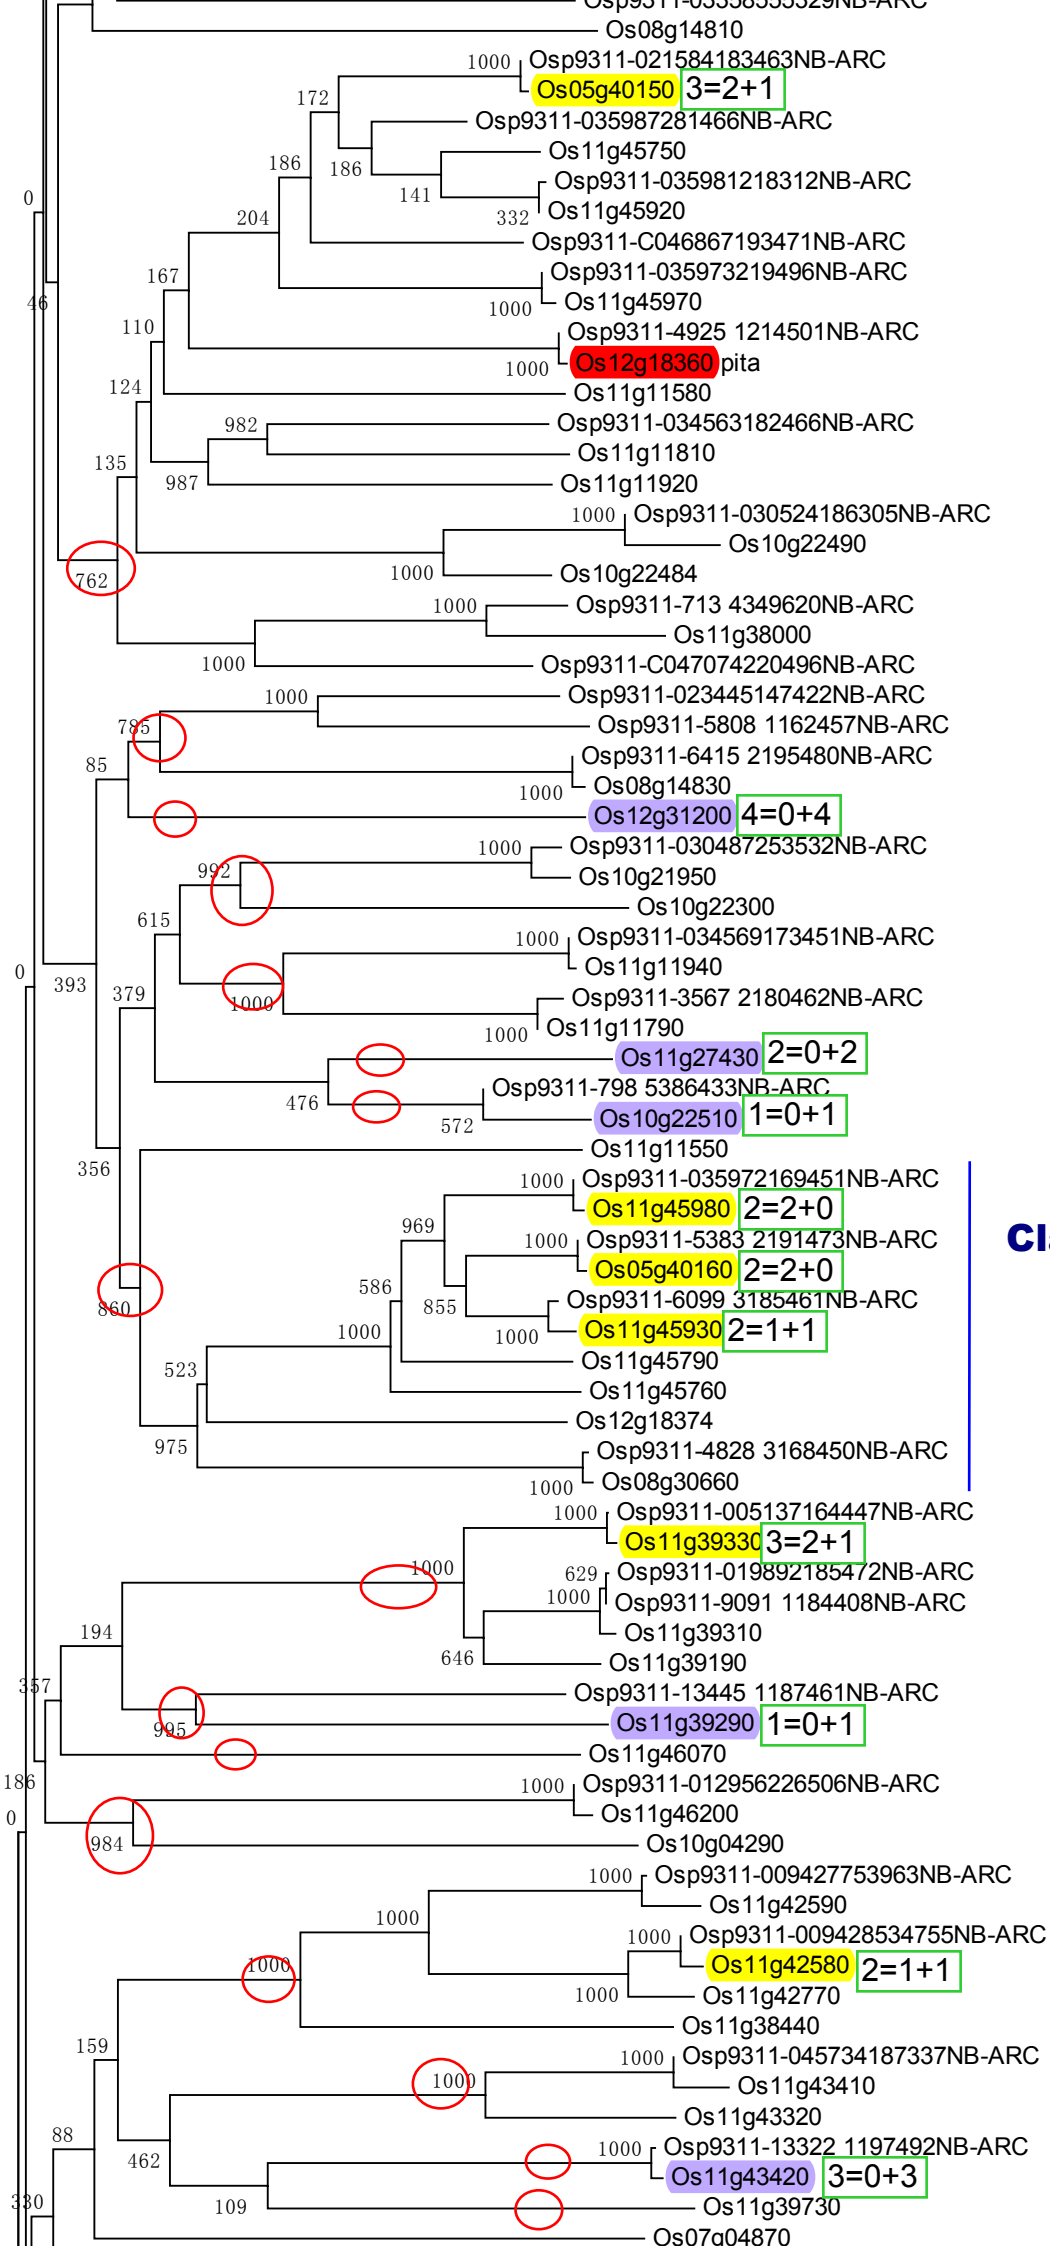

Pita locus  
(1)

Clade 5 in Table S9

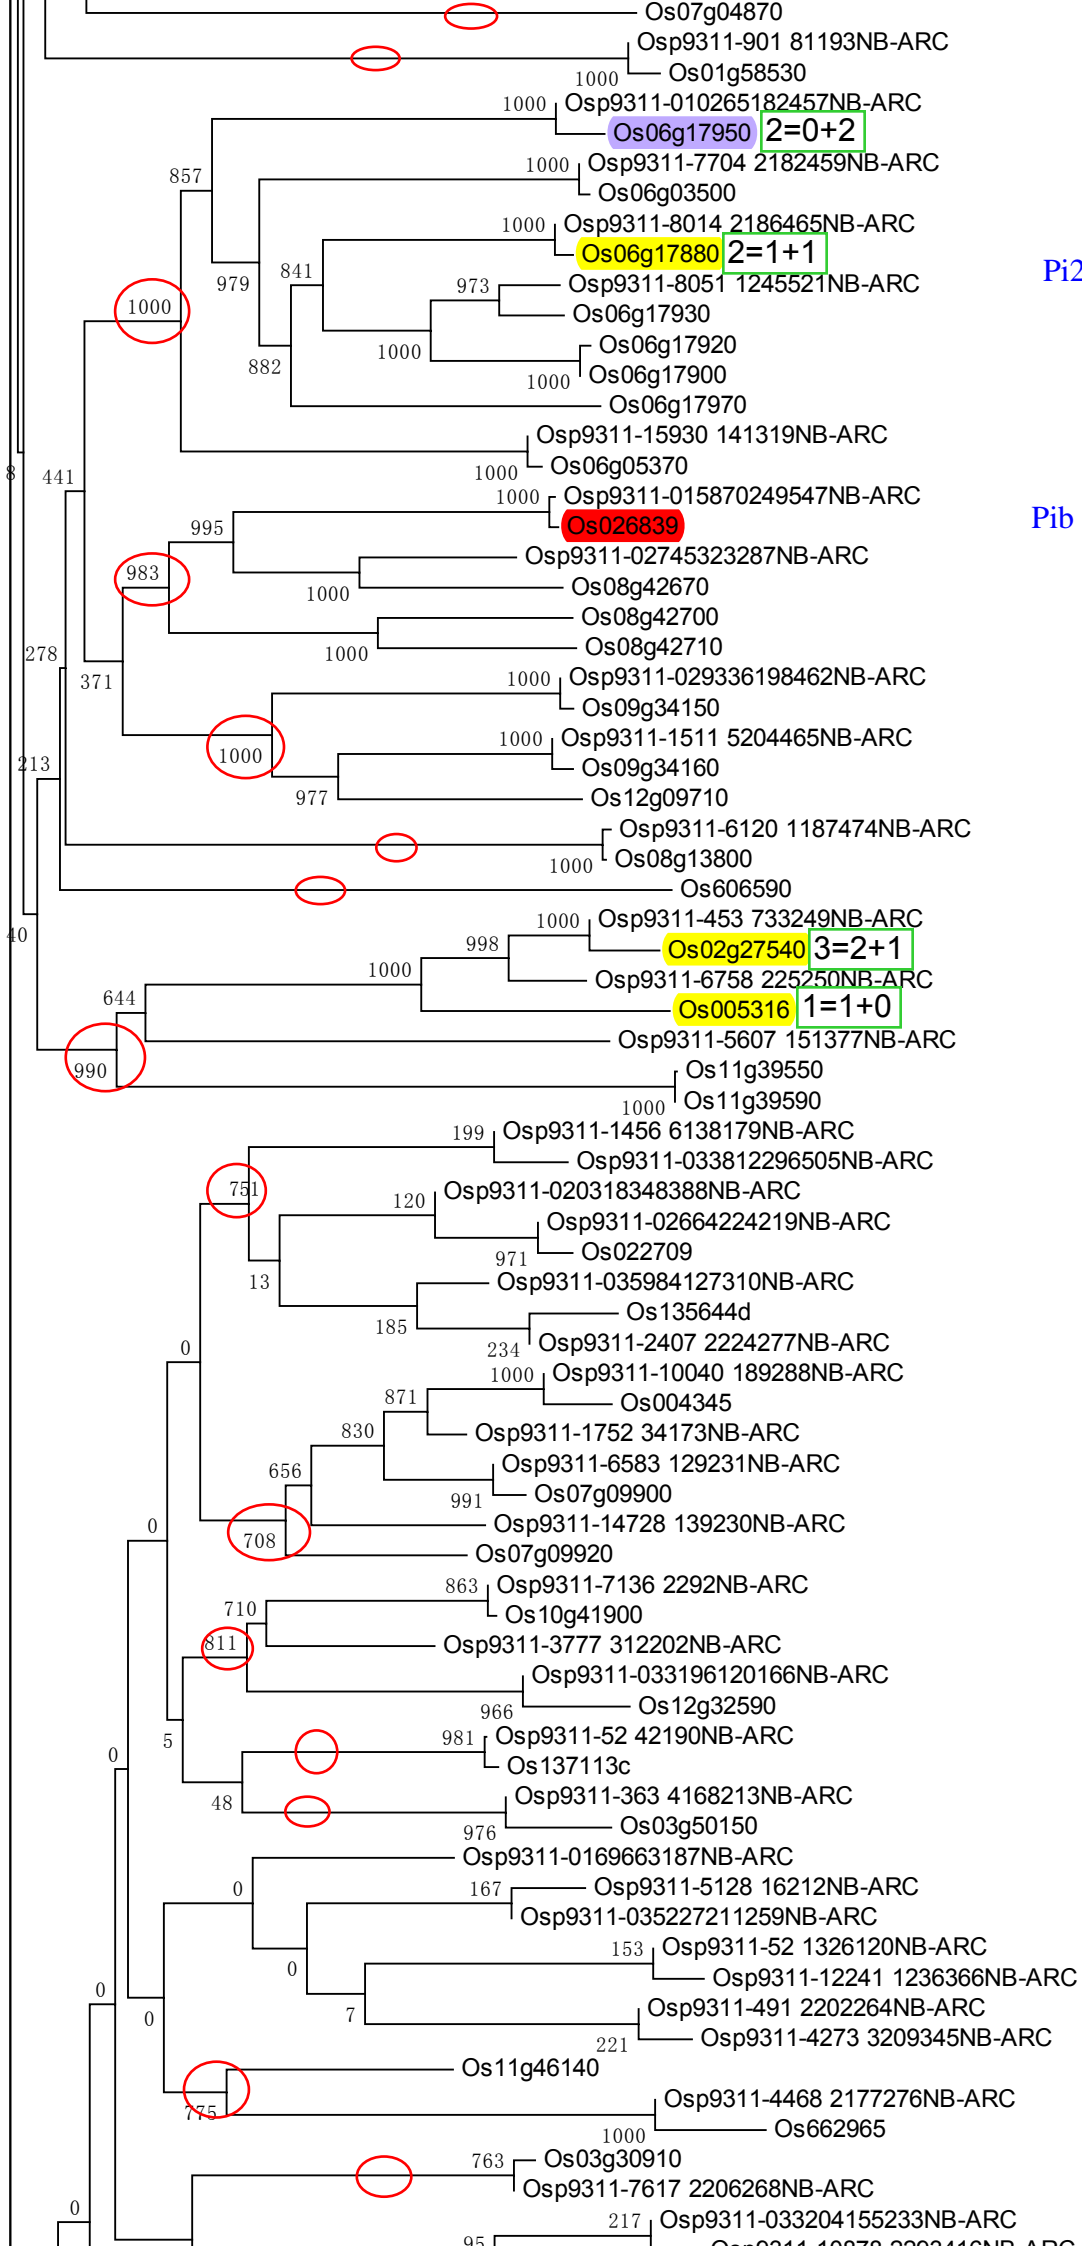

Pi2, Pi9, Piz-t, Pi50(t) loci (clade)  
(4)

Pib locus (clade)  
(1)



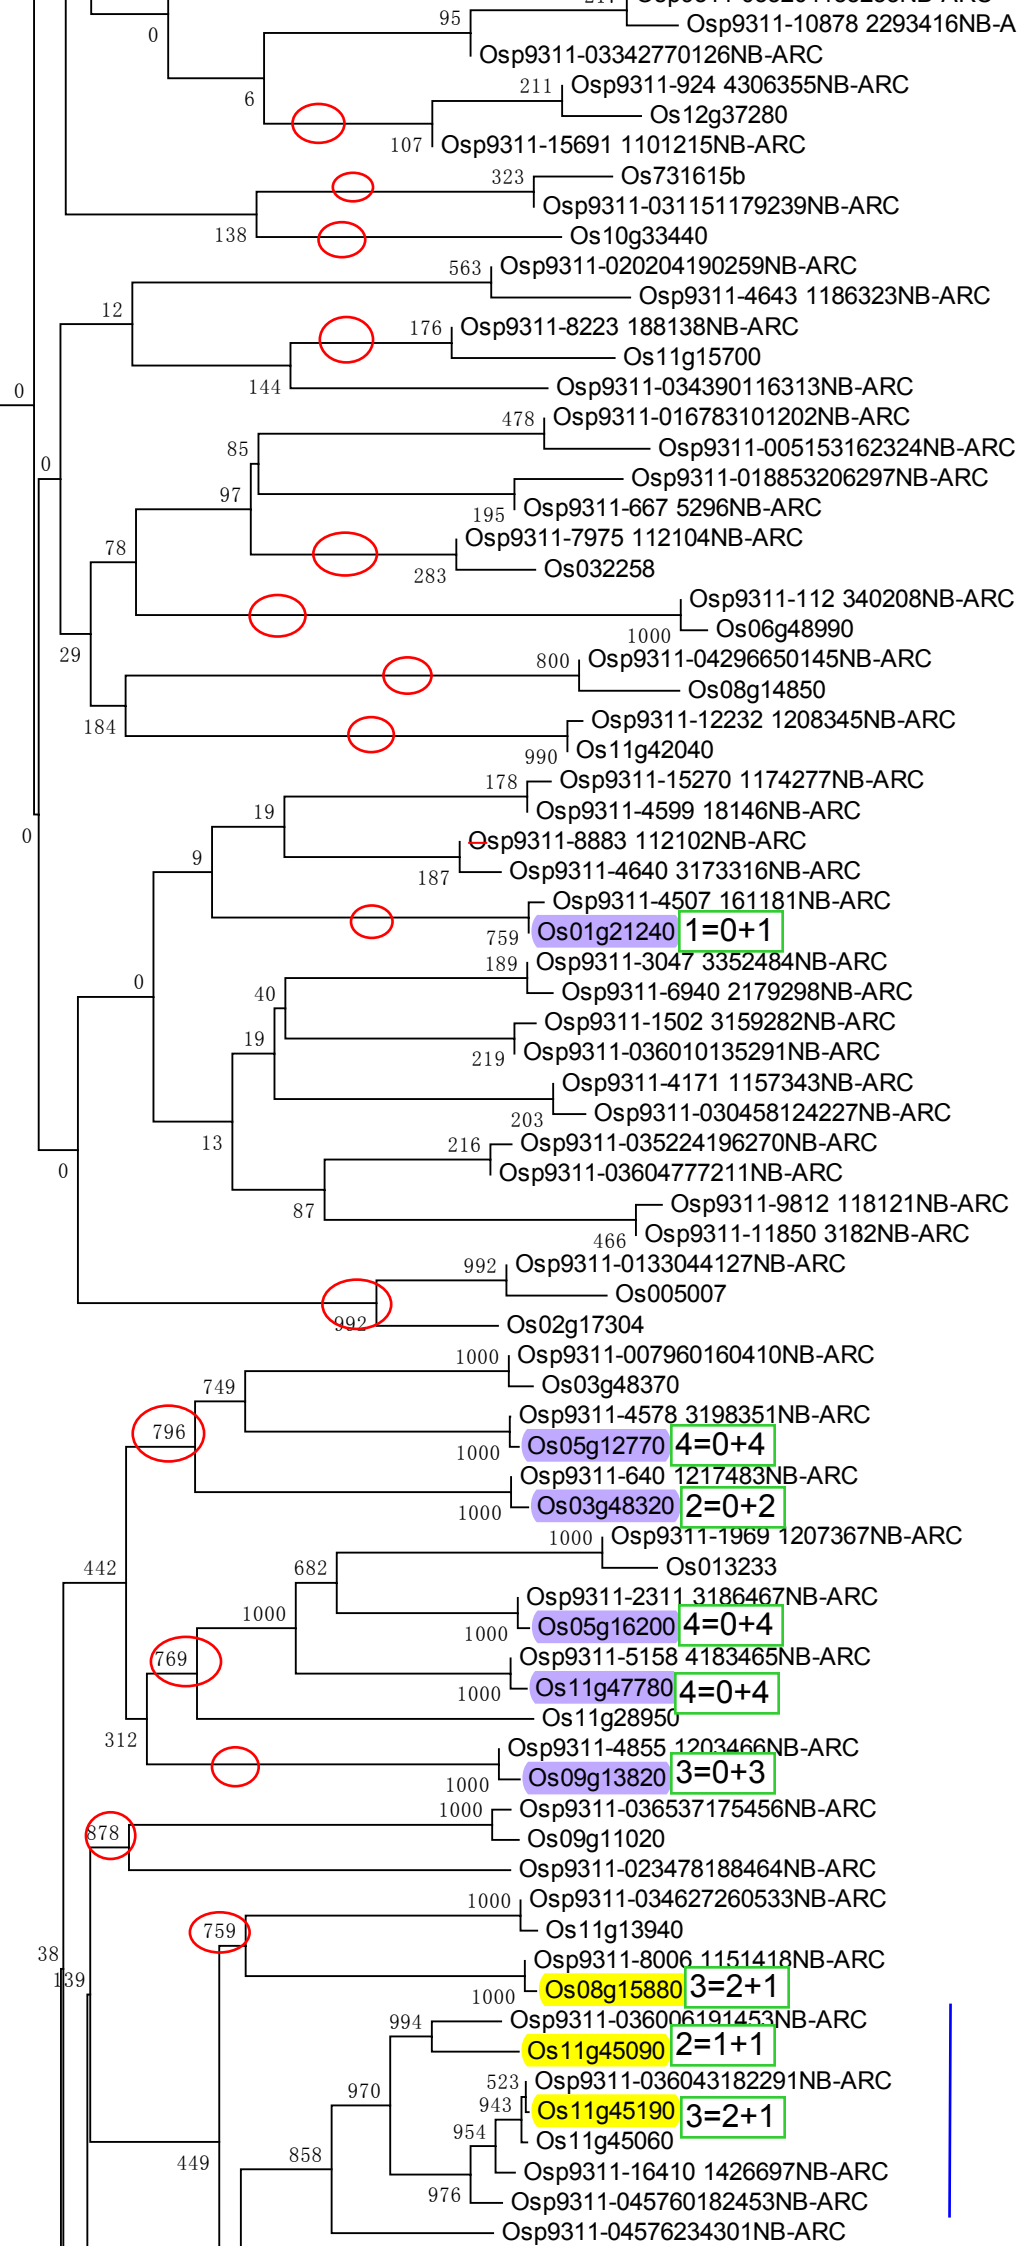

AC134922 locus

(6)

**Clade 6 in Table S9**

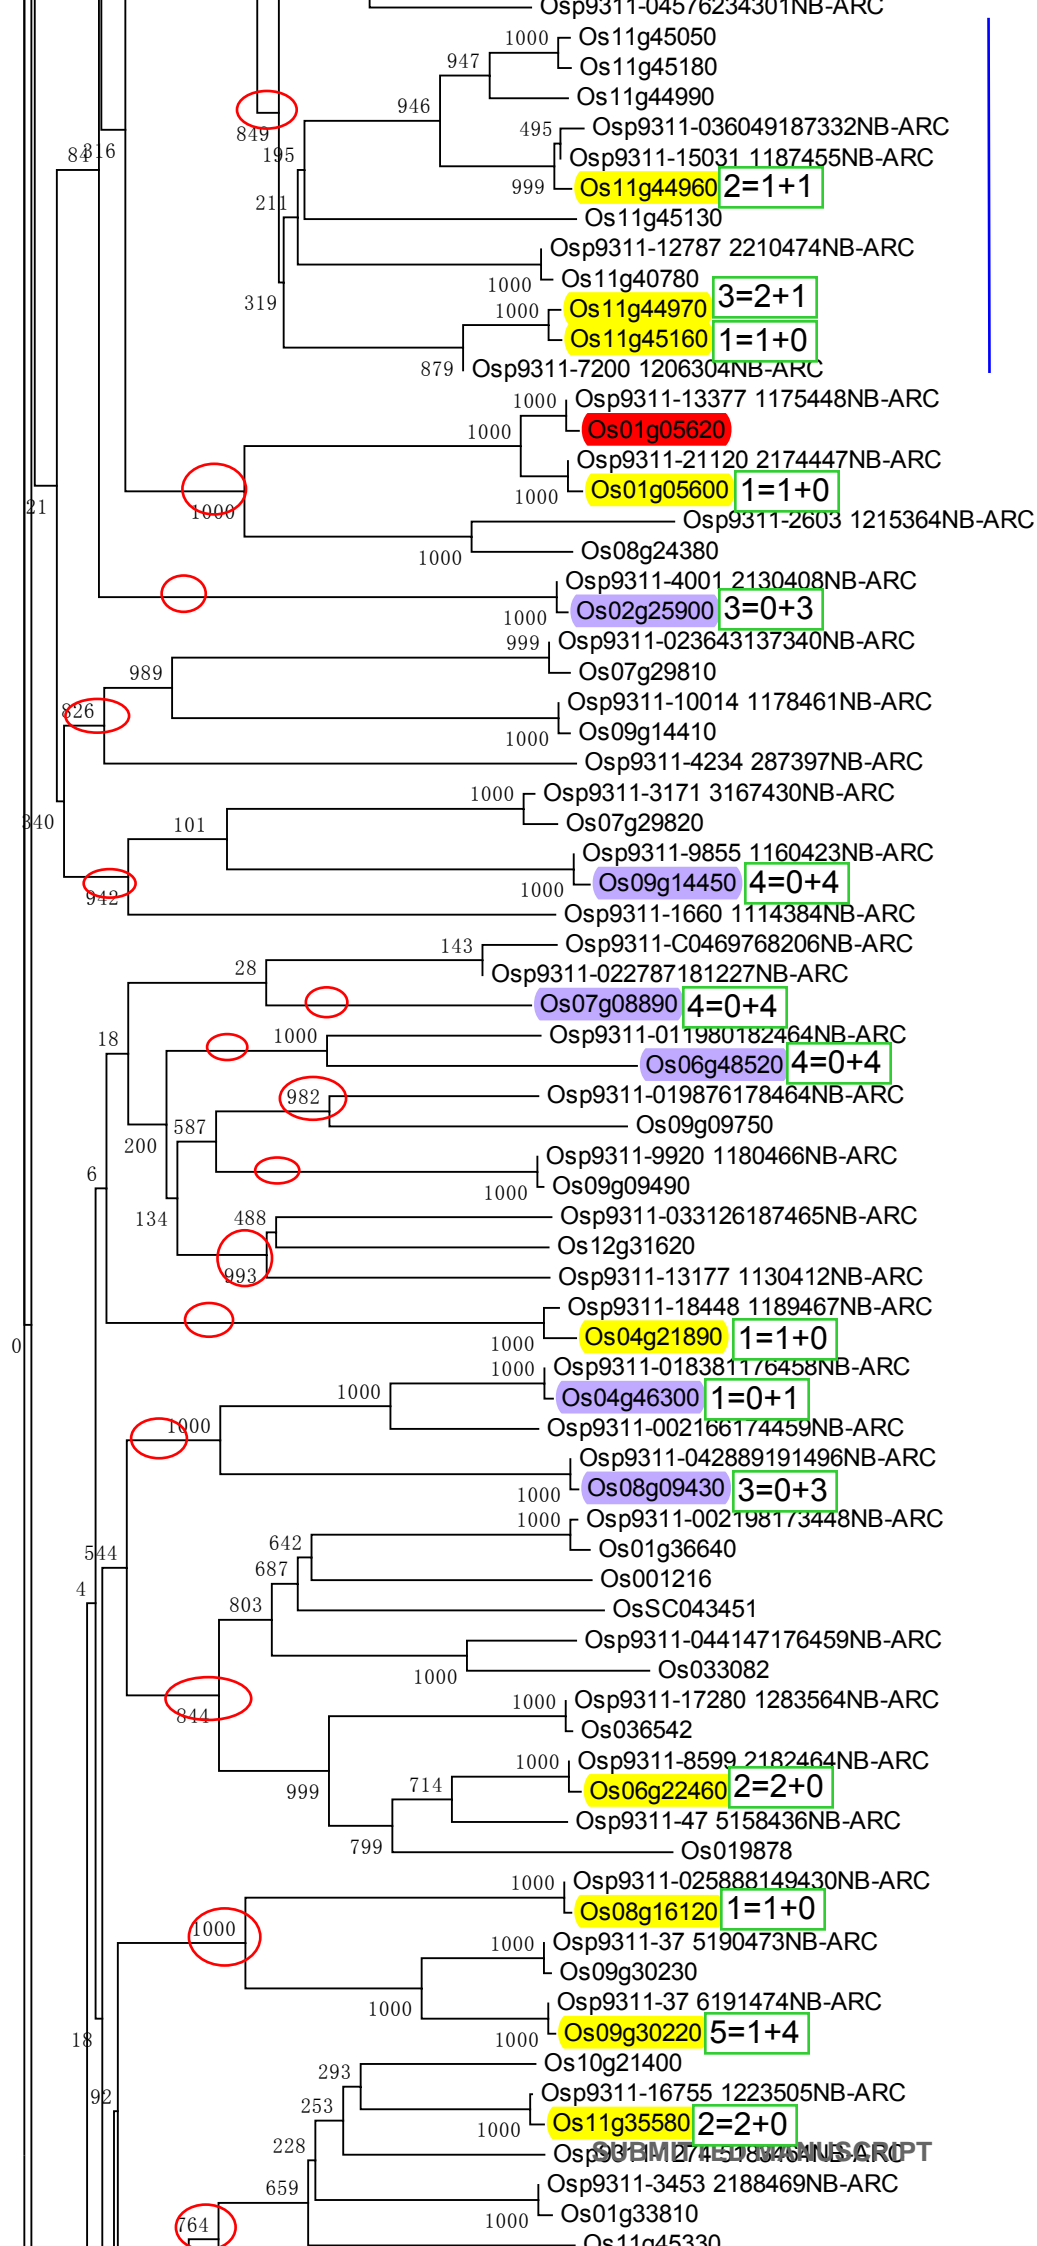

Pit locus (clade)  
(1)

Pd3 locus (clade)  
(1)



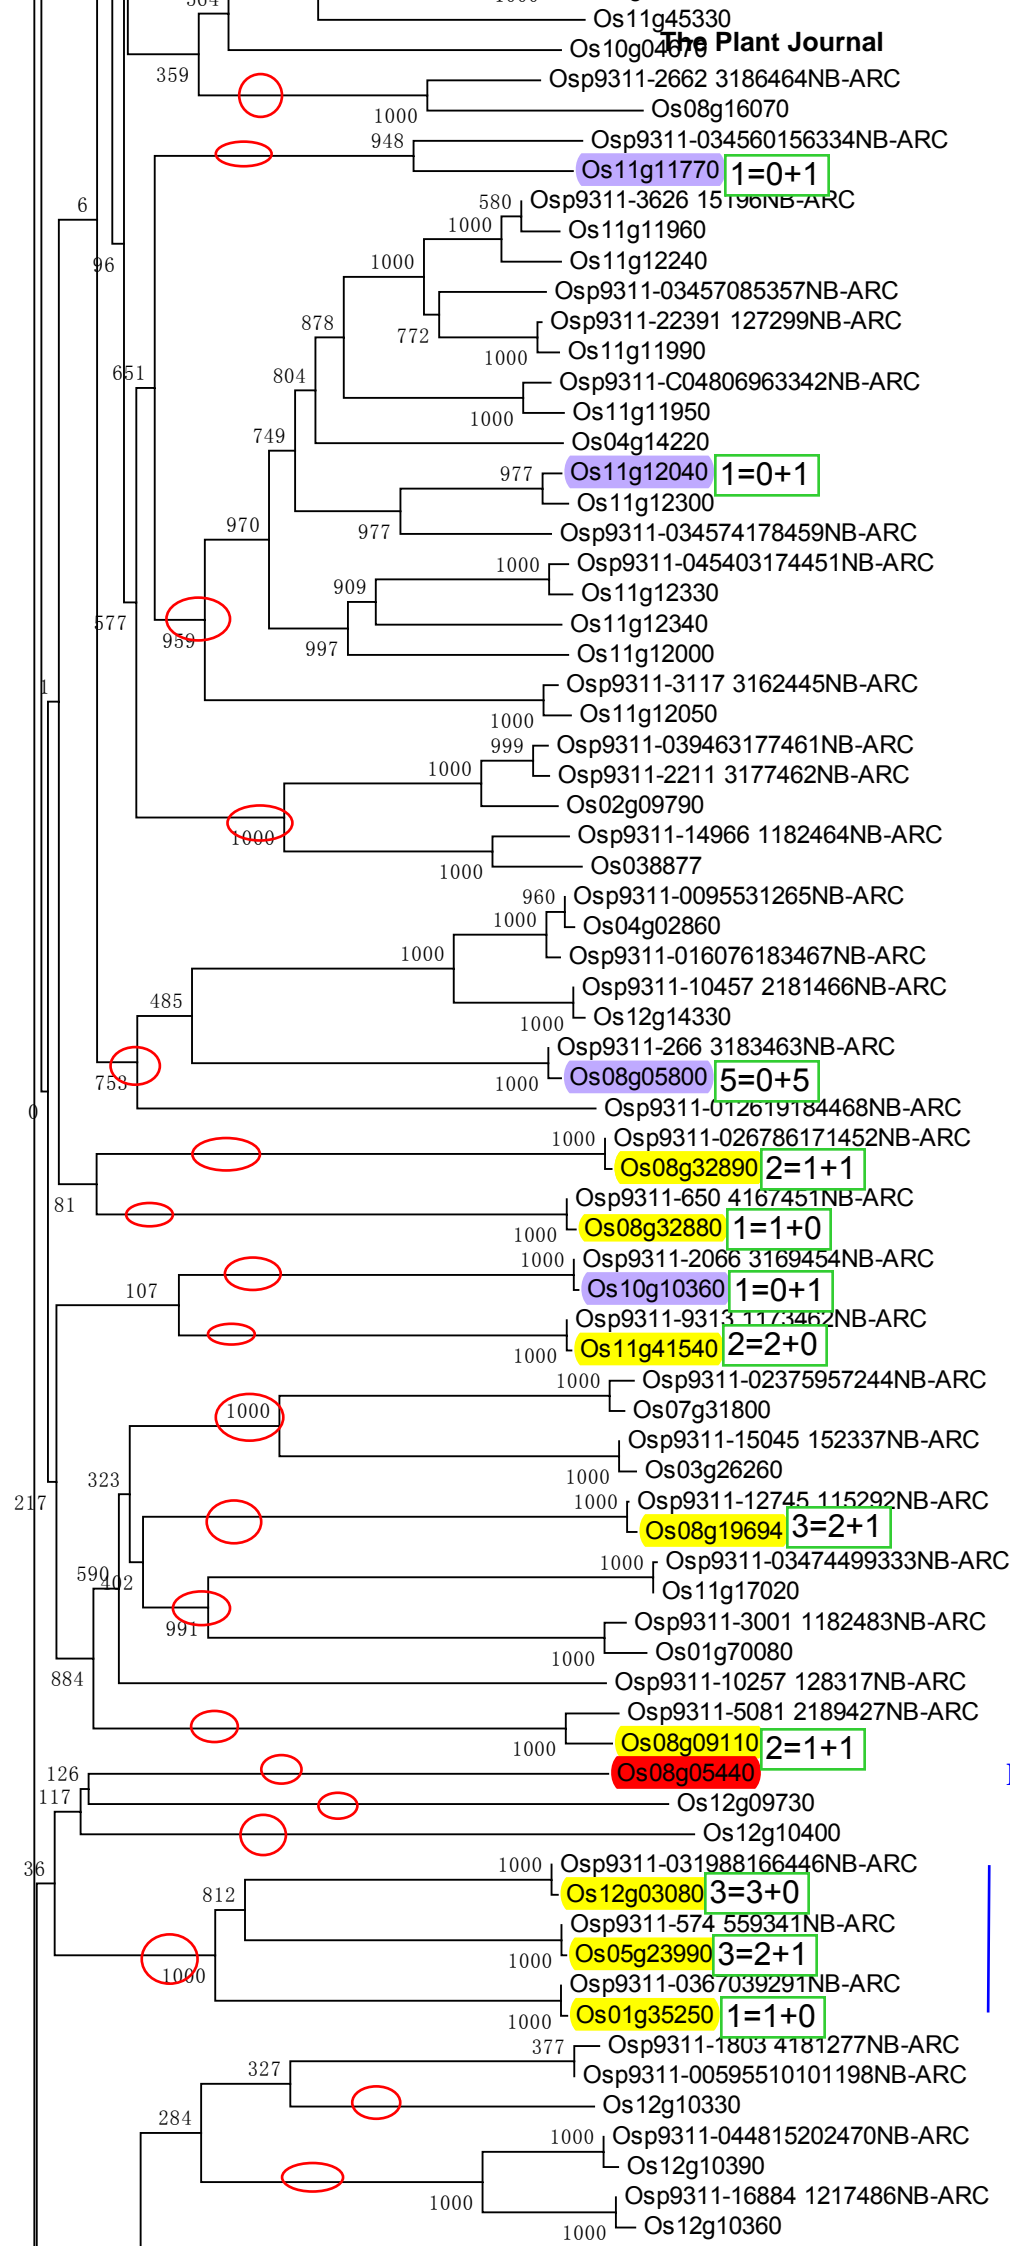

Pi36 locus (clade)  
(1)

Rp3/Pc locus (4)

**Clade 7 in Table S9**

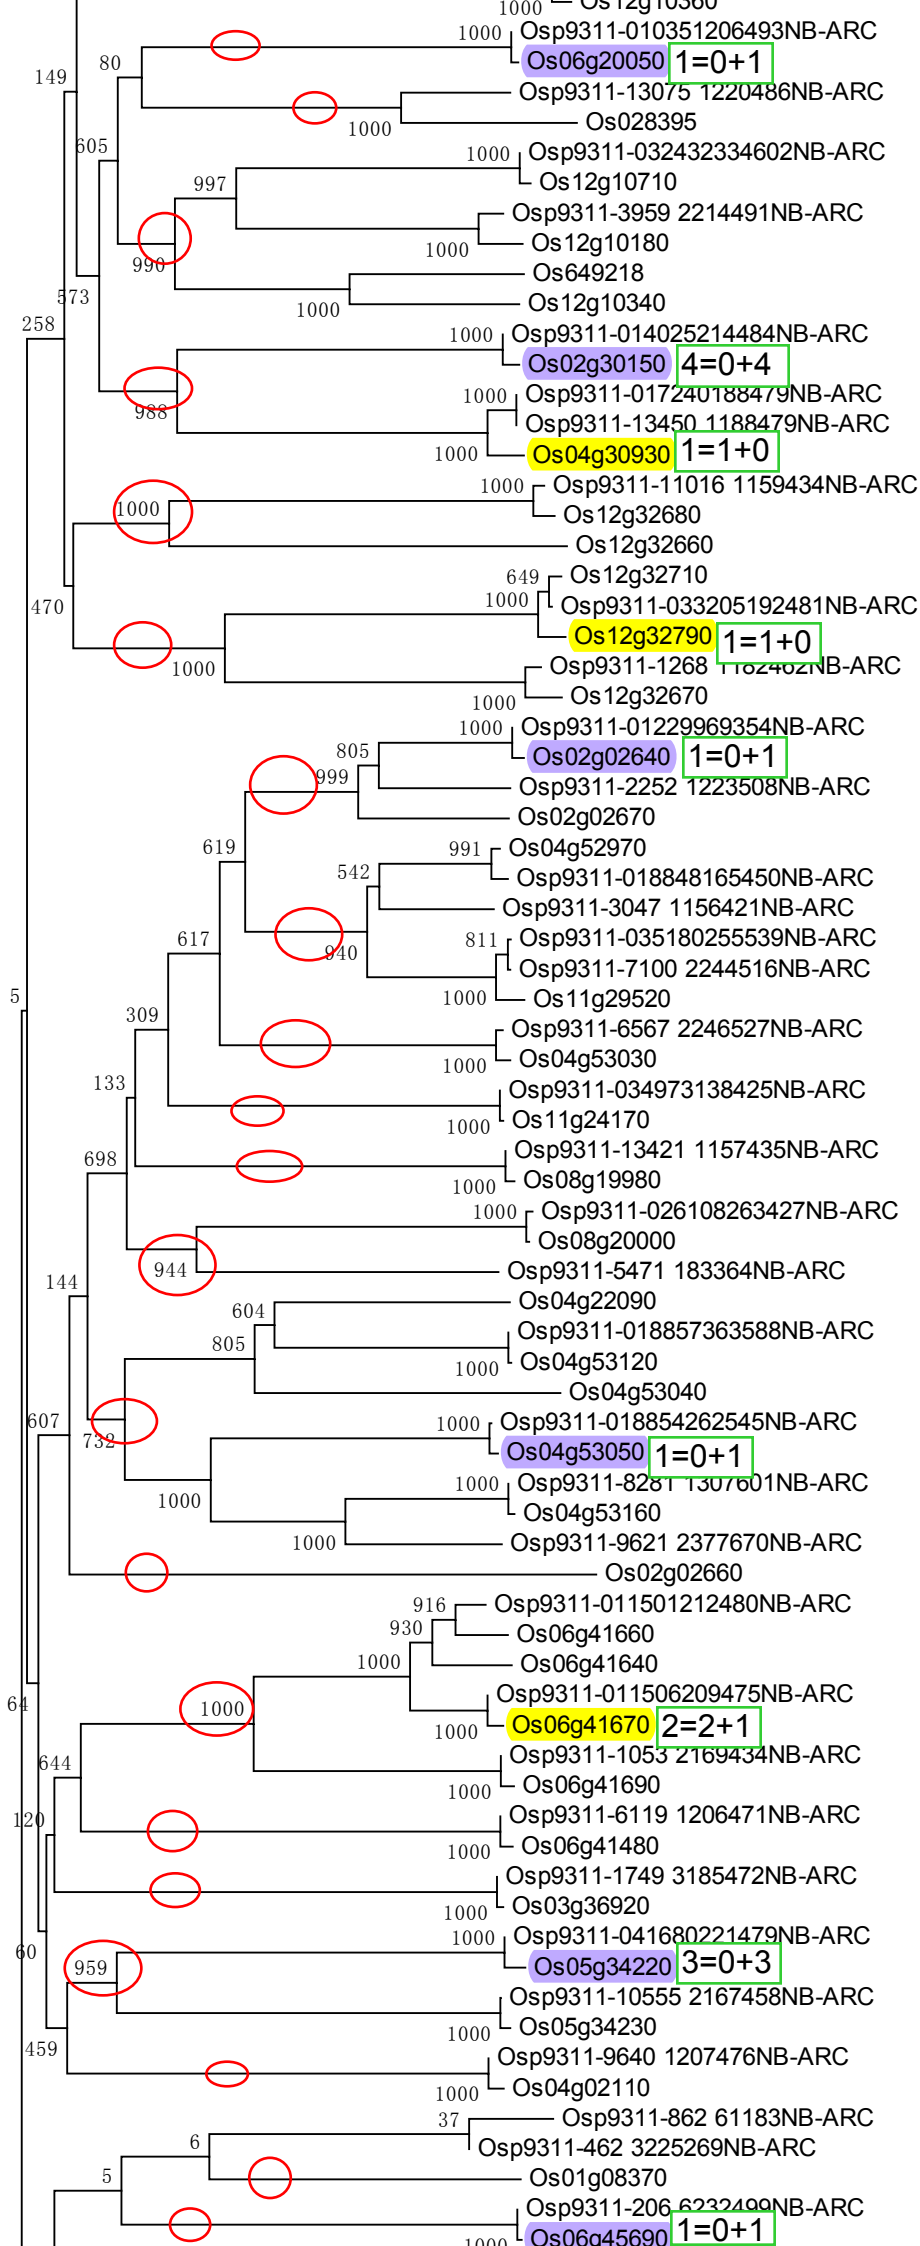

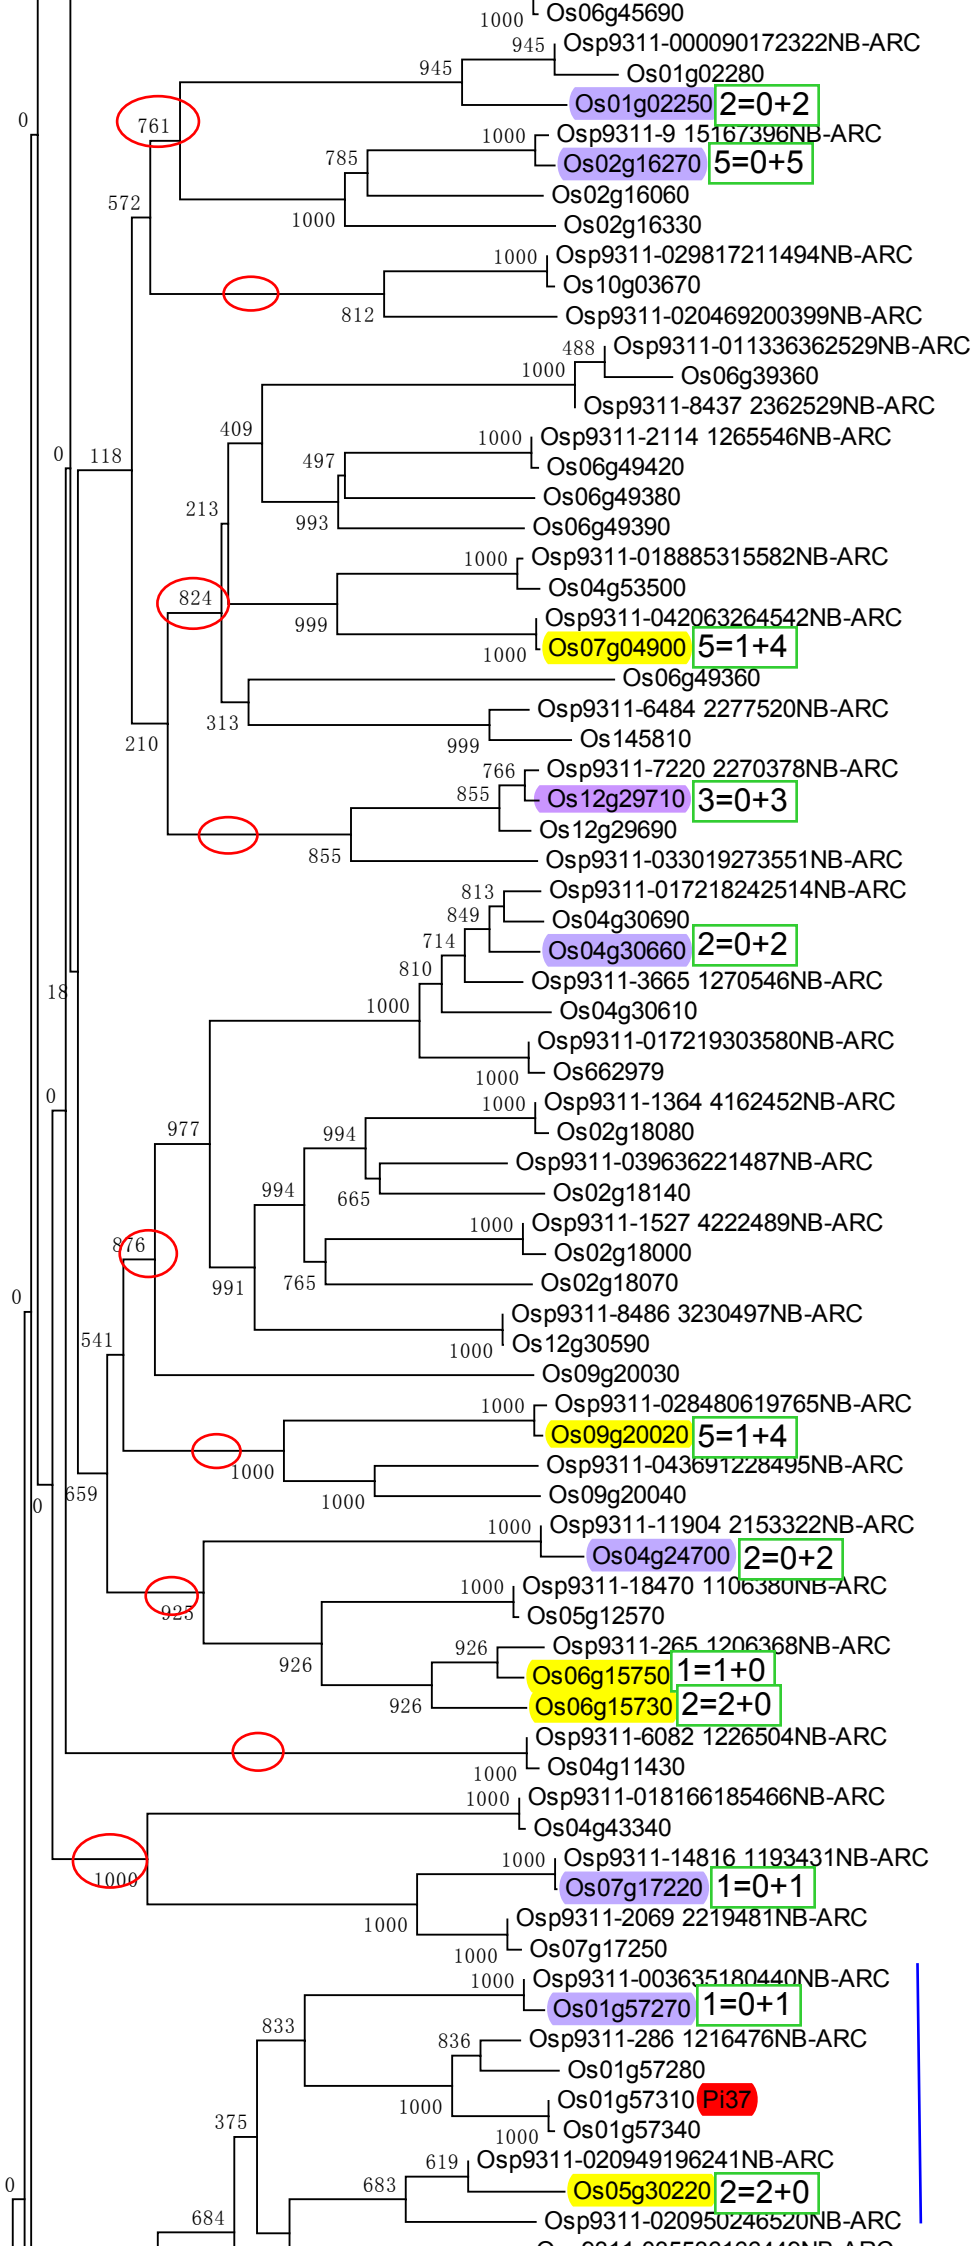

Rp1/Pi37 locus (4)  
**Clade 8 in Table S9**

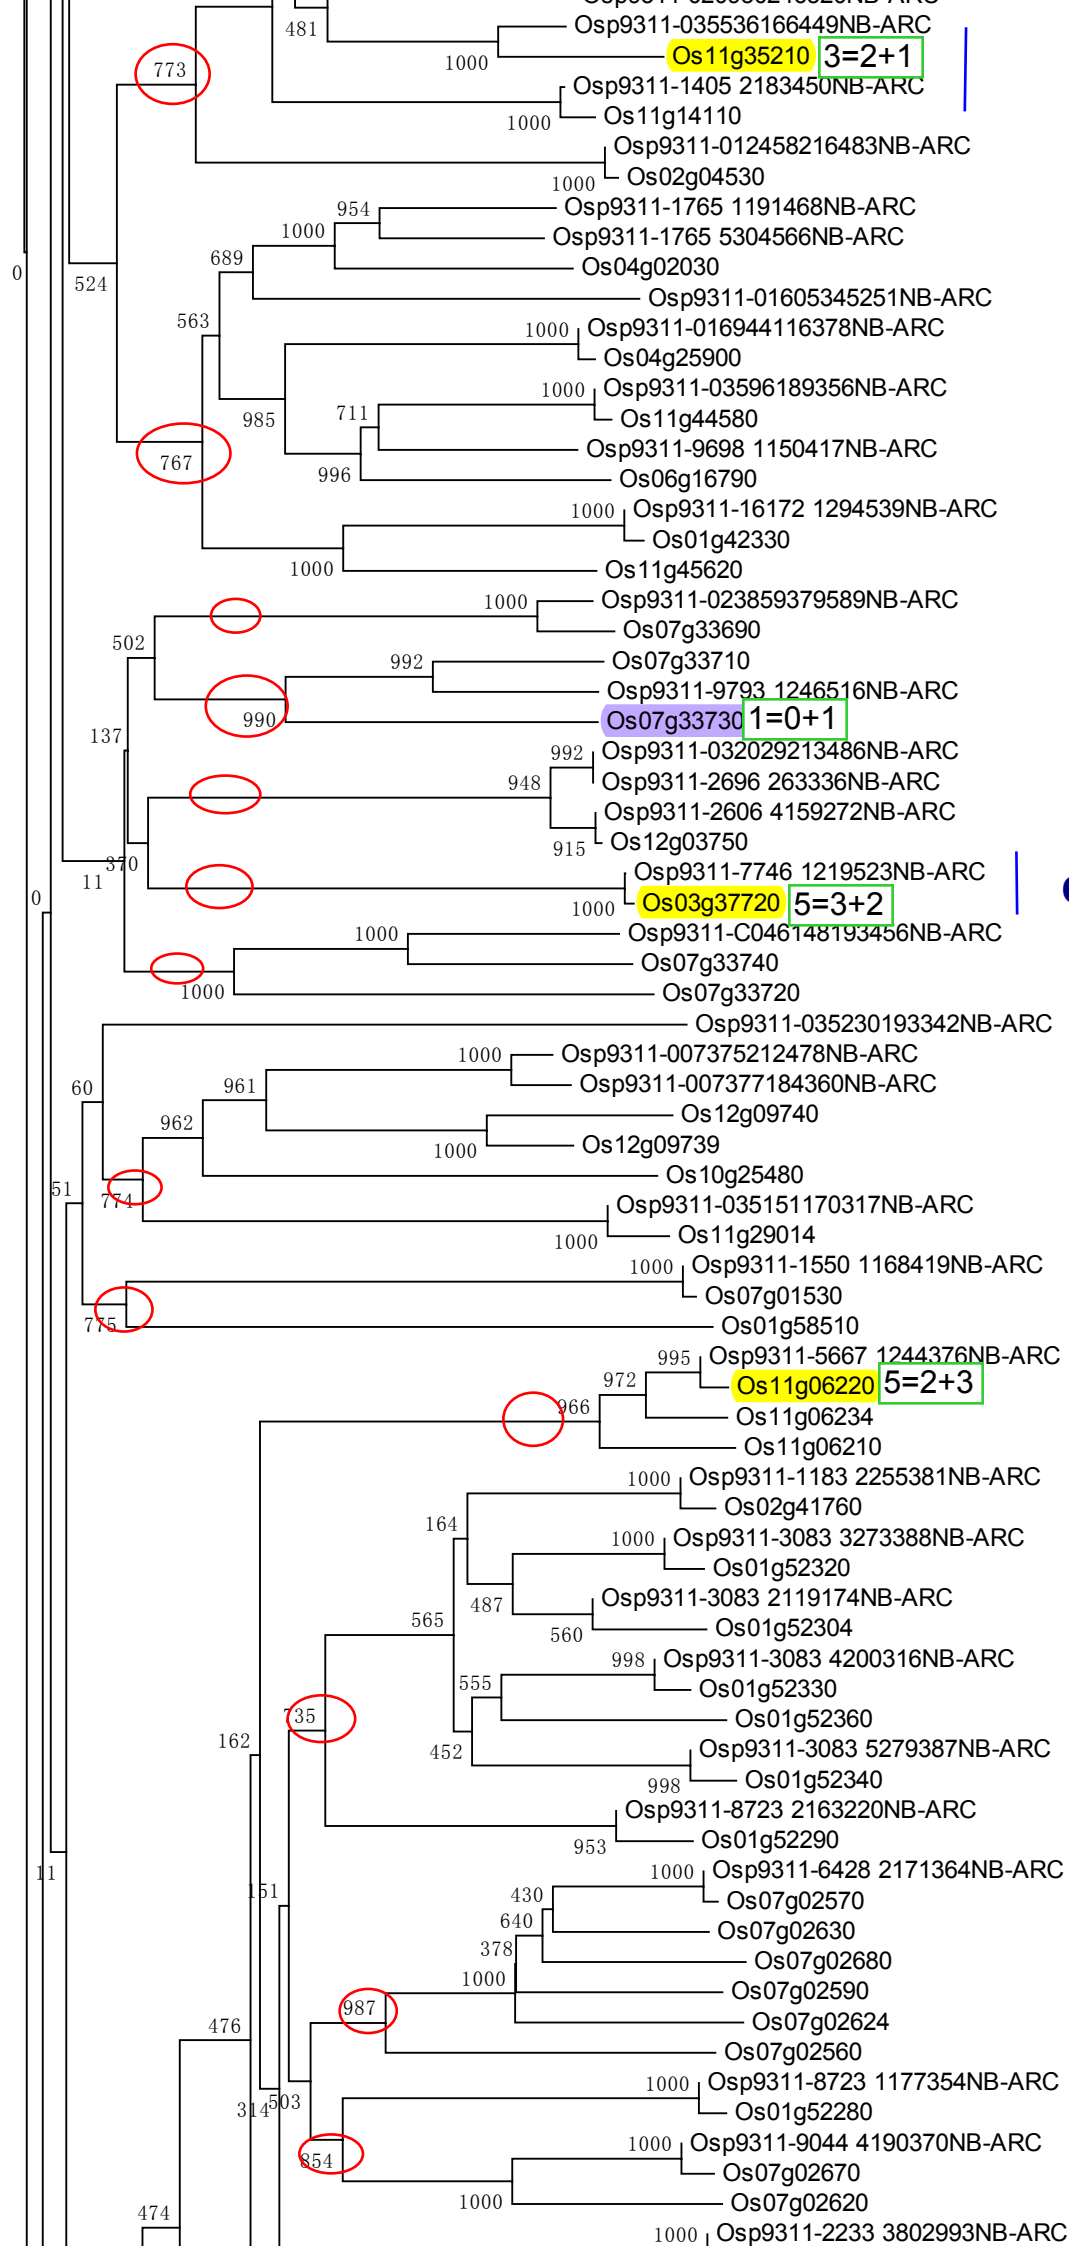

**Clade 9 in Table S9**

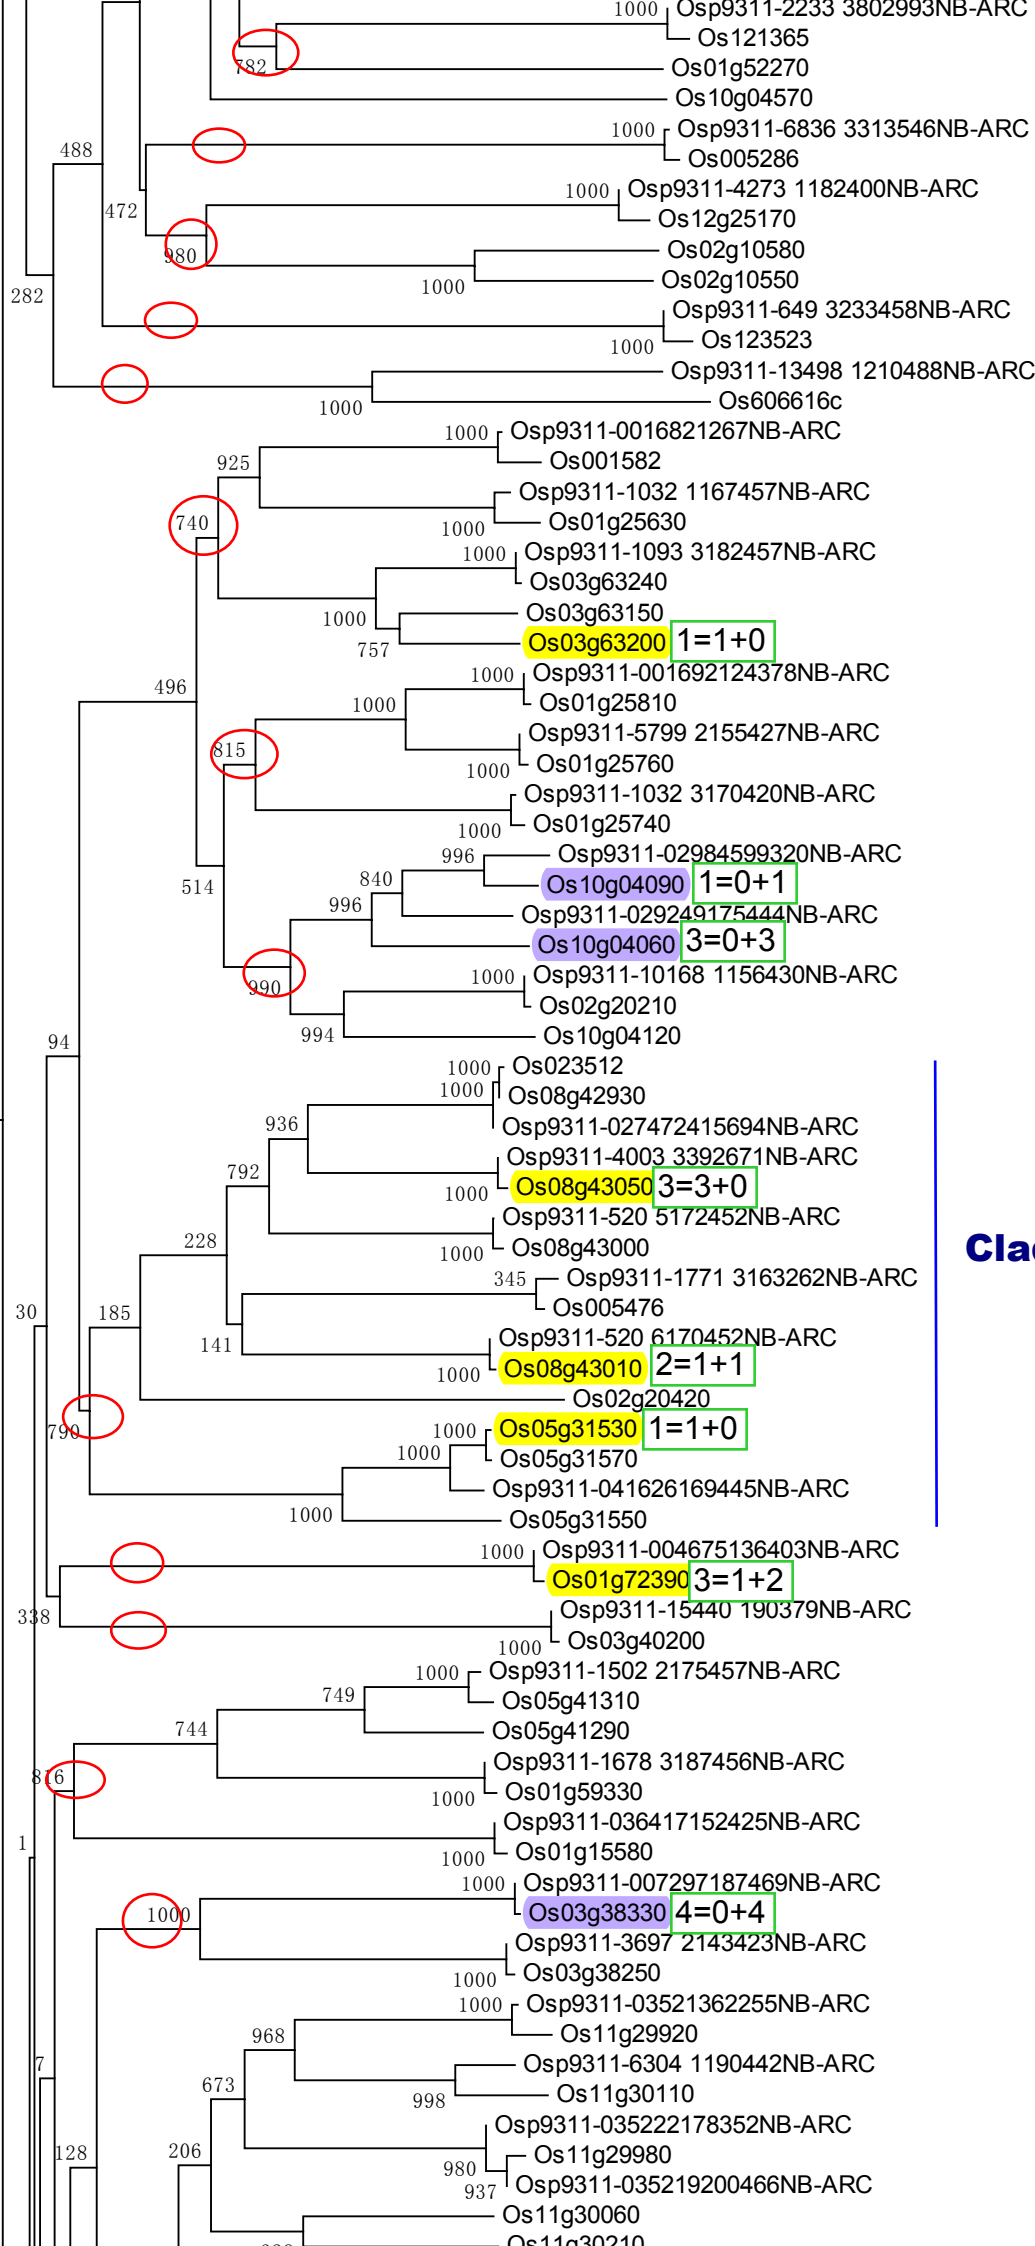

**Clade 10 in Table S9**

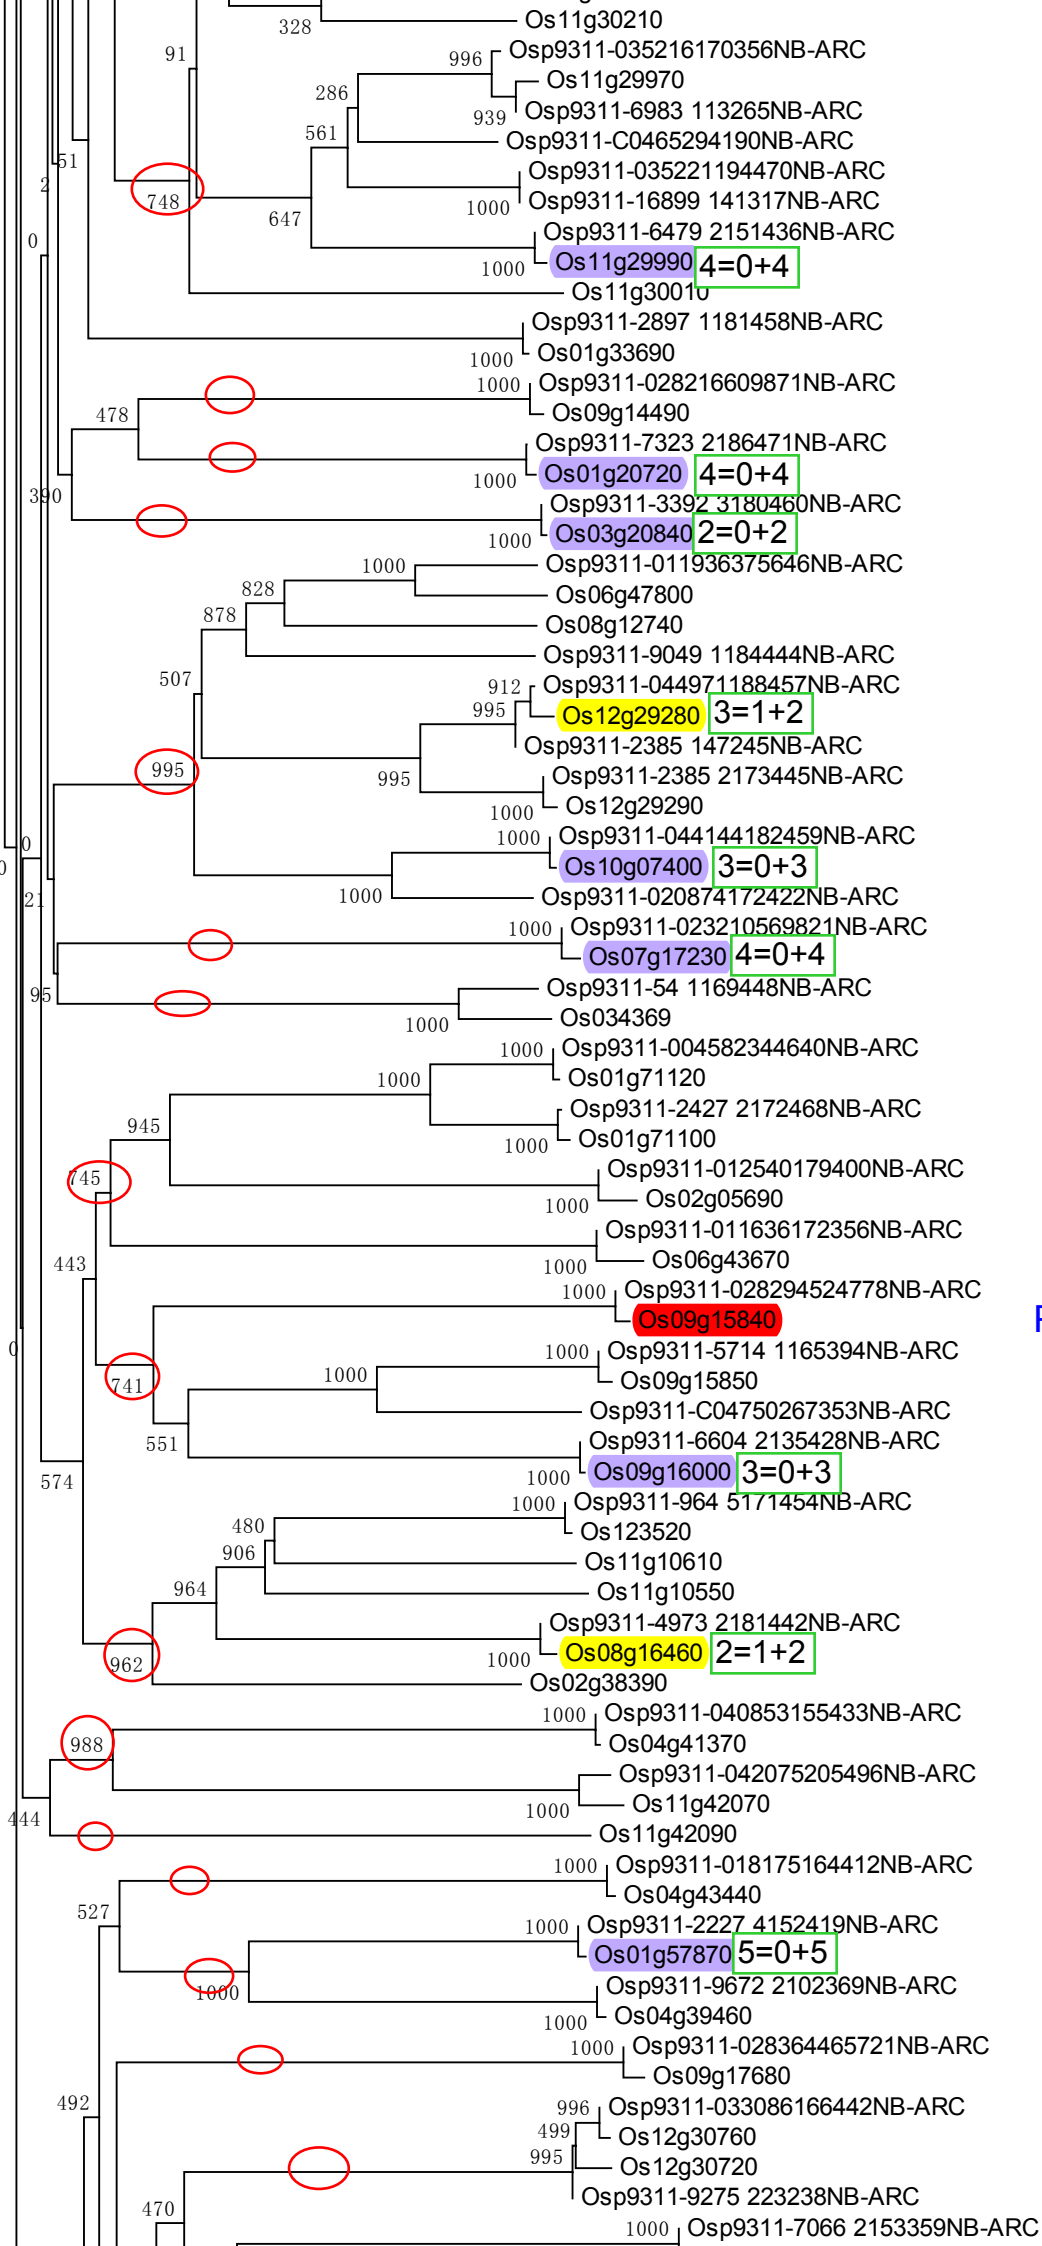

Pi5 locus  
(1)



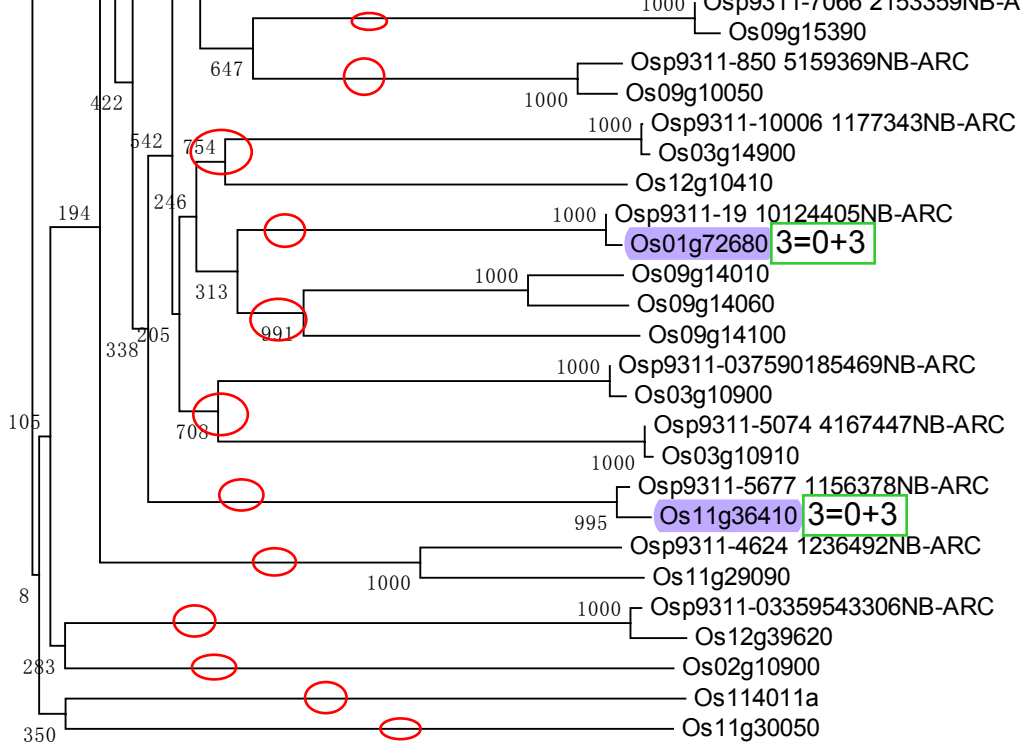

0.1



**Figure S3.** Phylogenetic tree of 12 rice blast strains constructed by nucleotide sequences from 11 loci, including six *Avr* genes (*Avr-pita*, *Avr-pia*, *Avr-pik*, *Avr-pii*, *Avr-pwl2* and *Avr-Ace-1*; Bohnert et al. 2004; Schneider et al. 2010; Yoshida et al. 2009; Zhou et al. 2007). The amino acid sequences were first aligned with the program MUSCLE using default options, and MEGA v5.0 was used subsequently to manually correct the alignments (Tamura et al. 2011). The resulting amino acid sequence alignments were then used to guide the alignments of the corresponding nucleotide coding sequences (CDSs). Based on the alignment results, phylogenetic trees were generated using the bootstrap Maximum Likelihood (ML) method with Kimura 2-parameter model by MEGA v5.0.2. The stability of internal nodes was assessed by bootstrap analysis with 1,000 replicates.

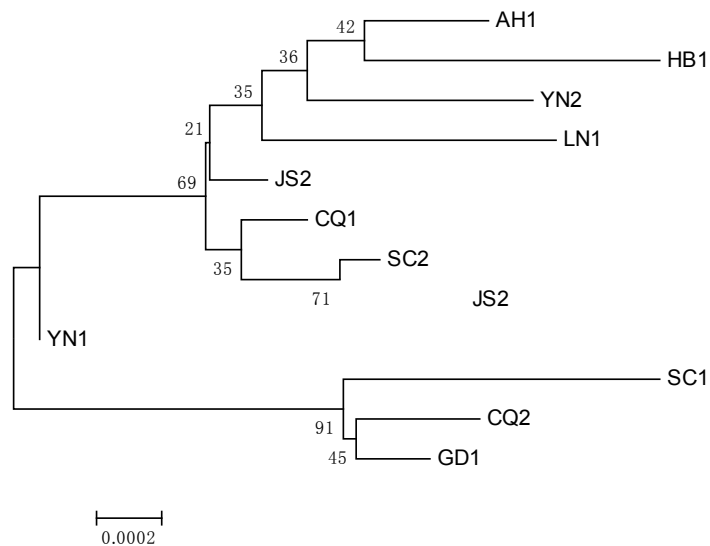

### Reference

- Bohnert HU, Fudal I, Diou W, Tharreau D, Notteghem JL, et al. (2004) A putative polyketide synthase/peptide synthetase from *Magnaporthe grisea* signals pathogen attack to resistant rice. *Plant Cell* 16: 2499-2513.
- Schneider DRS, Saraiva AM, Azzoni AR, Miranda HRCAN, de Toledo MAS, et al. (2010) Overexpression and purification of PWL2D, a mutant of the effector protein PWL2 from *Magnaporthe grisea*. *Protein Expression and Purification* 74: 24-31
- Tamura K, Peterson D, Peterson N, Stecher G, Nei M, and Kumar S (2011) MEGA5: Molecular Evolutionary Genetics Analysis using Maximum Likelihood, Evolutionary Distance, and Maximum Parsimony Methods. *Mol Biol Evol* 28 (10): 2731-2739.
- Yoshida K, Saitoh H, Fujisawa S, Kanzaki H, Matsumura H, et al. (2009) Association genetics reveals three novel avirulence genes from the rice blast fungal pathogen *Magnaporthe oryzae*. *Plant Cell* 21: 1573-1591.
- Zhou E, Jia Y, Singh P, Correll JC, Lee FN (2007) Instability of the *Magnaporthe oryzae* avirulence gene *AVR-Pita* alters virulence. *Fungal Genet Biol* 44: 1024-1034

**Figure S4.** Phylogenetic trees of cloned NBS-LRR genes from five resistant rice cultivars (red, resistant lines; green, *M*-resistant lines; please see this figure in a separate PDF file). The amino acid sequences of these NBS-LRR genes were first aligned with the program MUSCLE using default options, and MEGA v5.0 was used subsequently to manually correct the alignments (Tamura et al. 2011). The resulting amino acid sequence alignments were then used to guide the alignments of the corresponding nucleotide coding sequences (CDSs). Based on the CDS alignment results, phylogenetic trees were constructed using the bootstrap NJ method with *p*-distance model by MEGA v5.02. The stability of internal nodes was assessed by bootstrap analysis with 1,000 replicates.

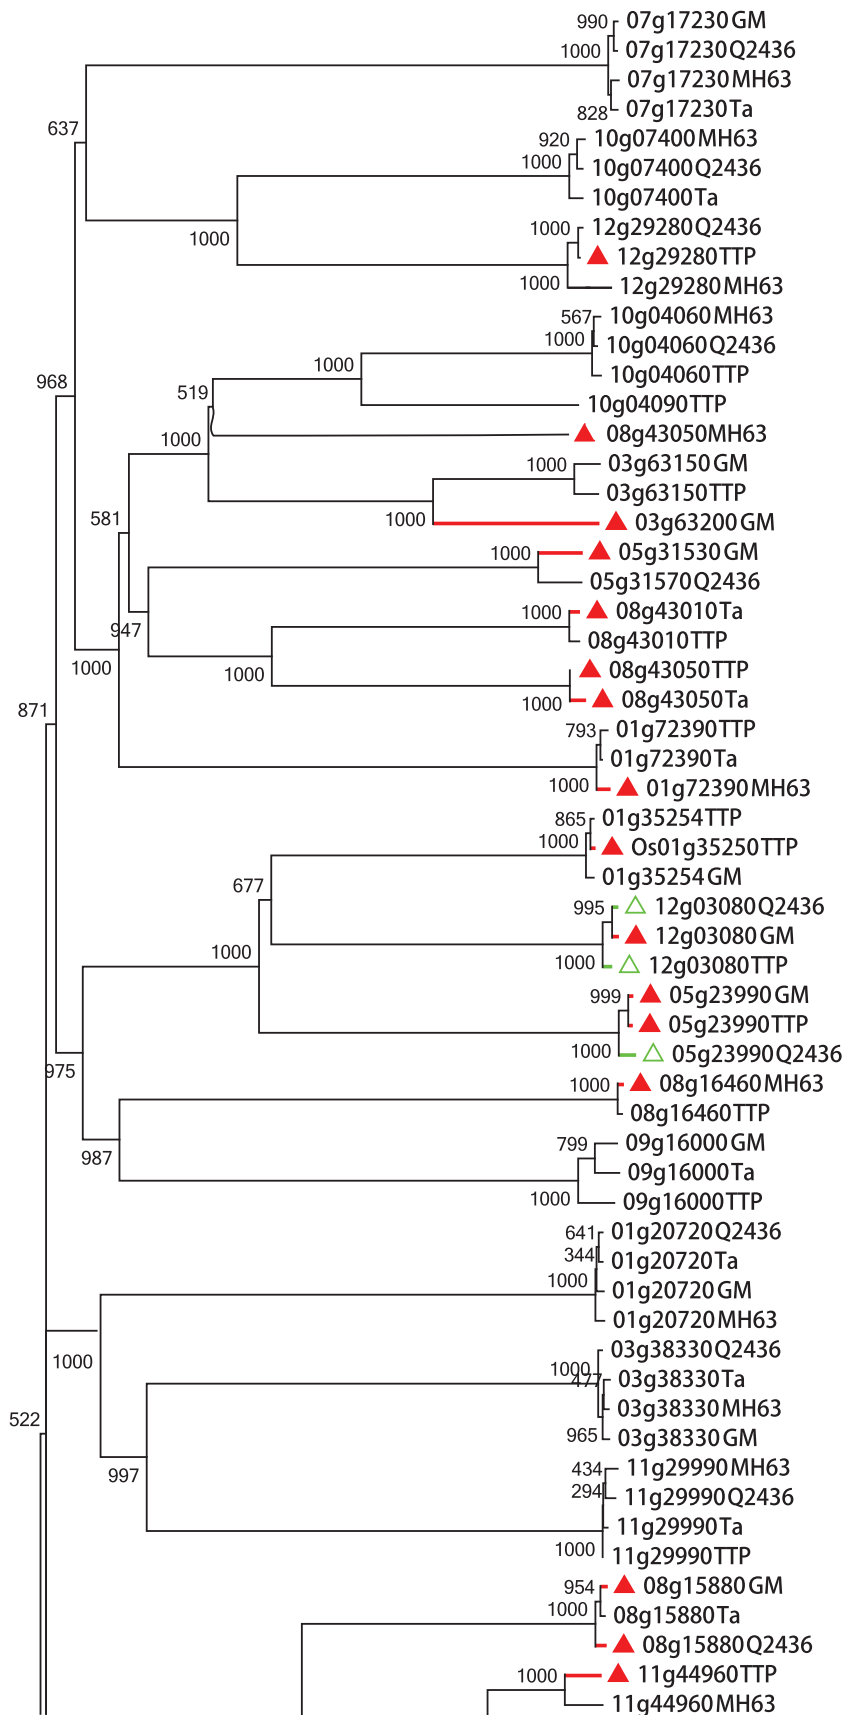





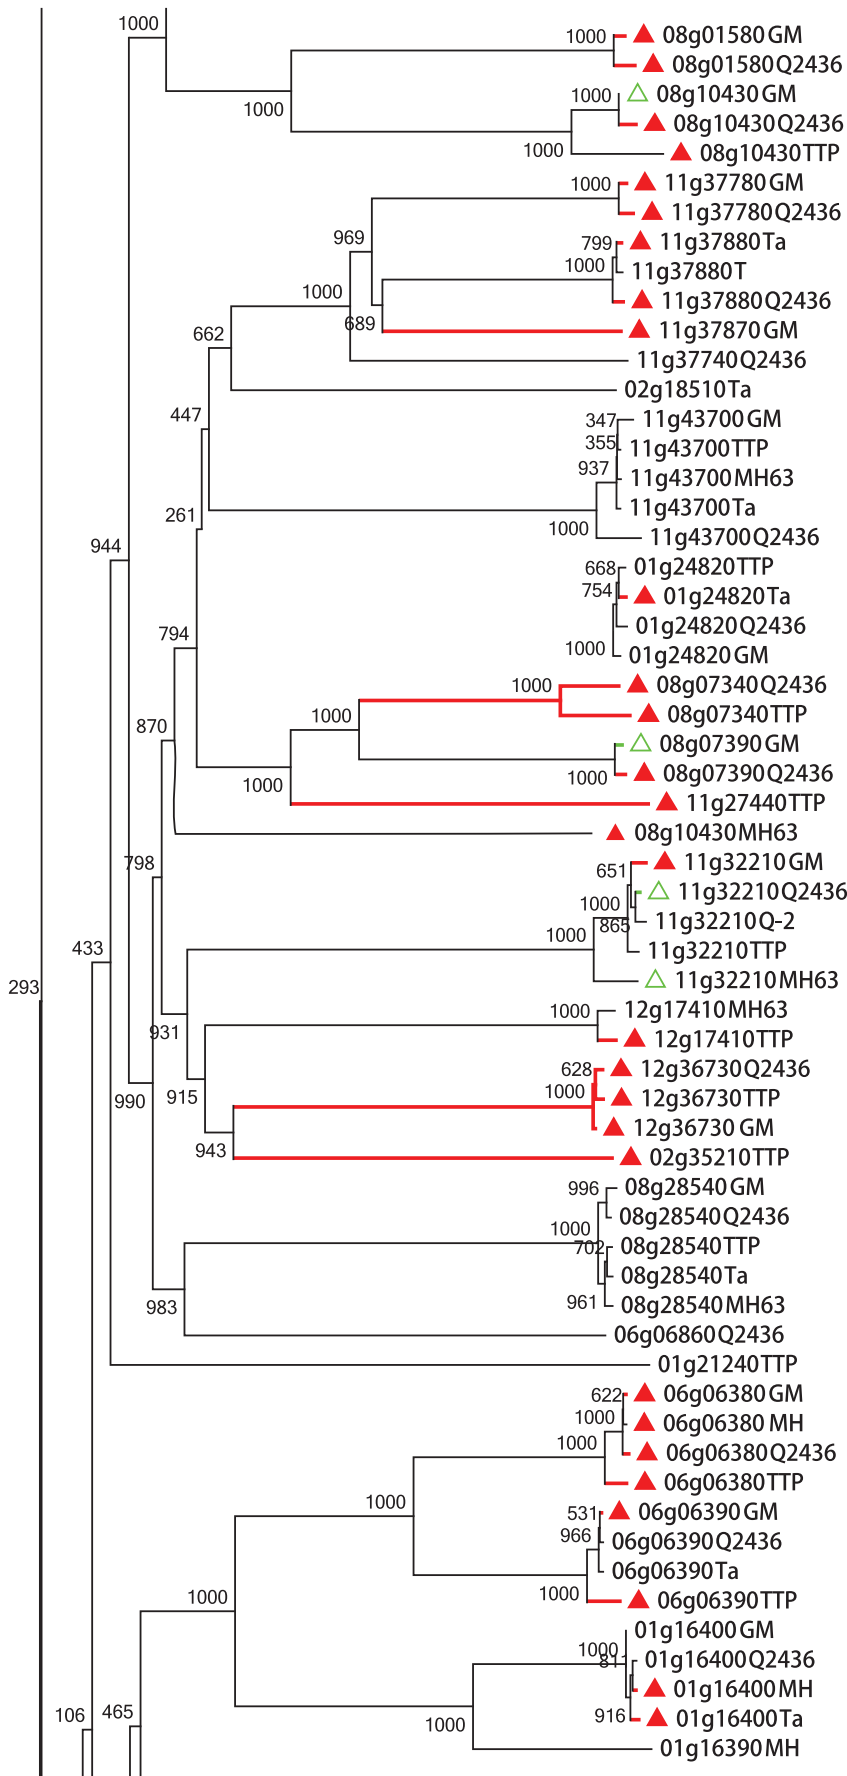

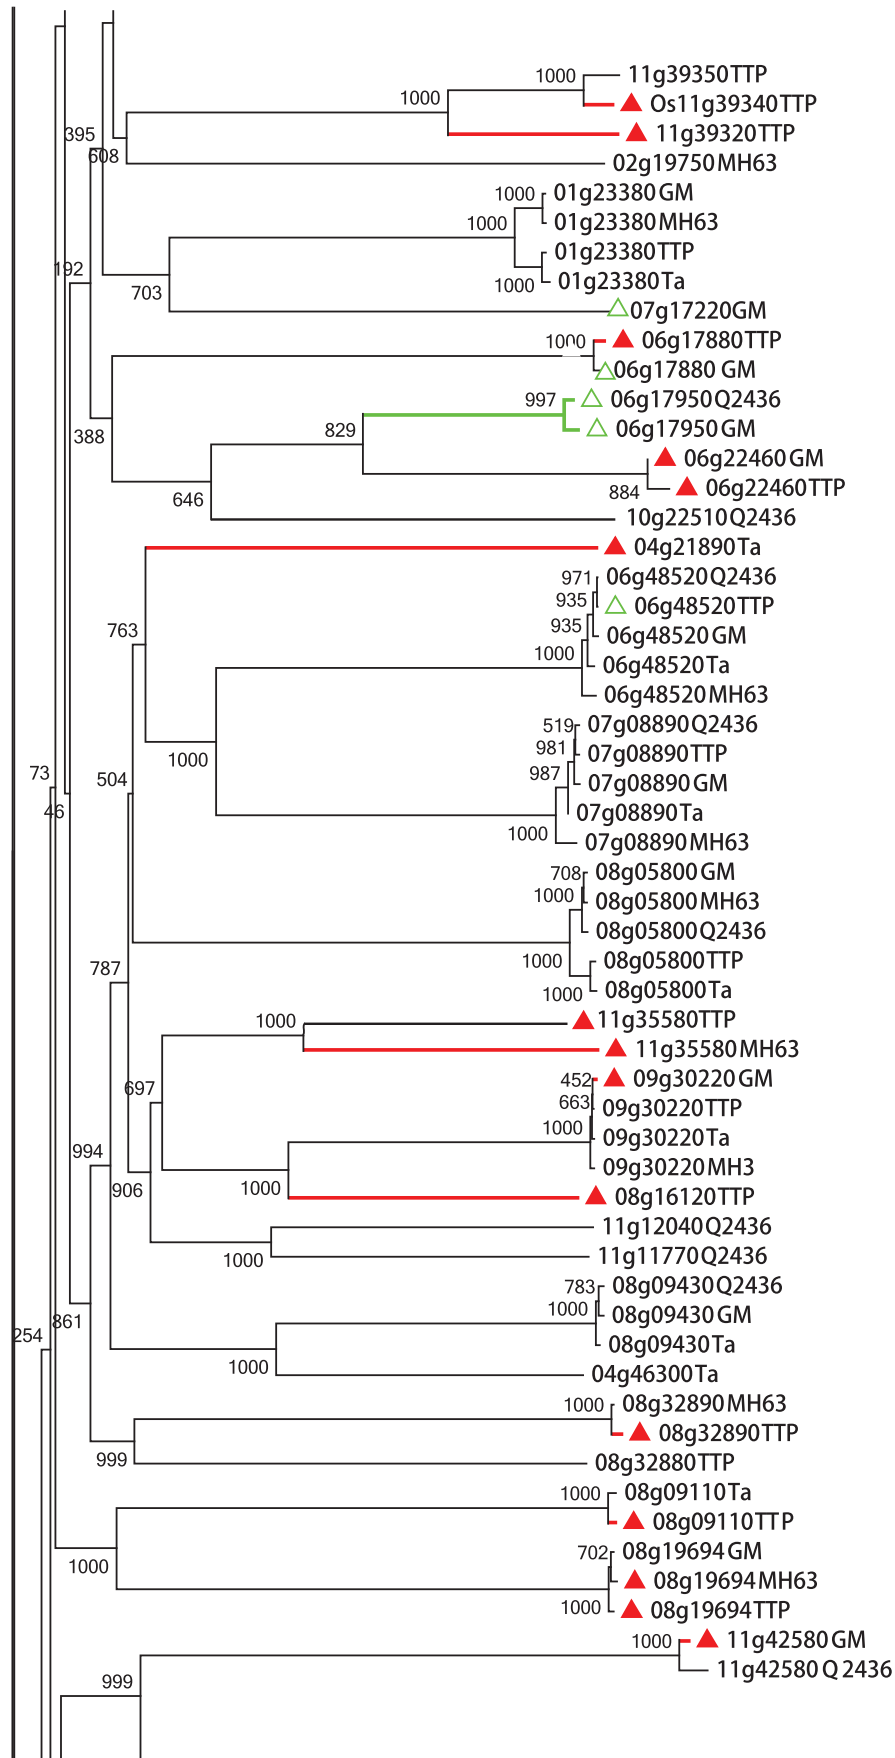



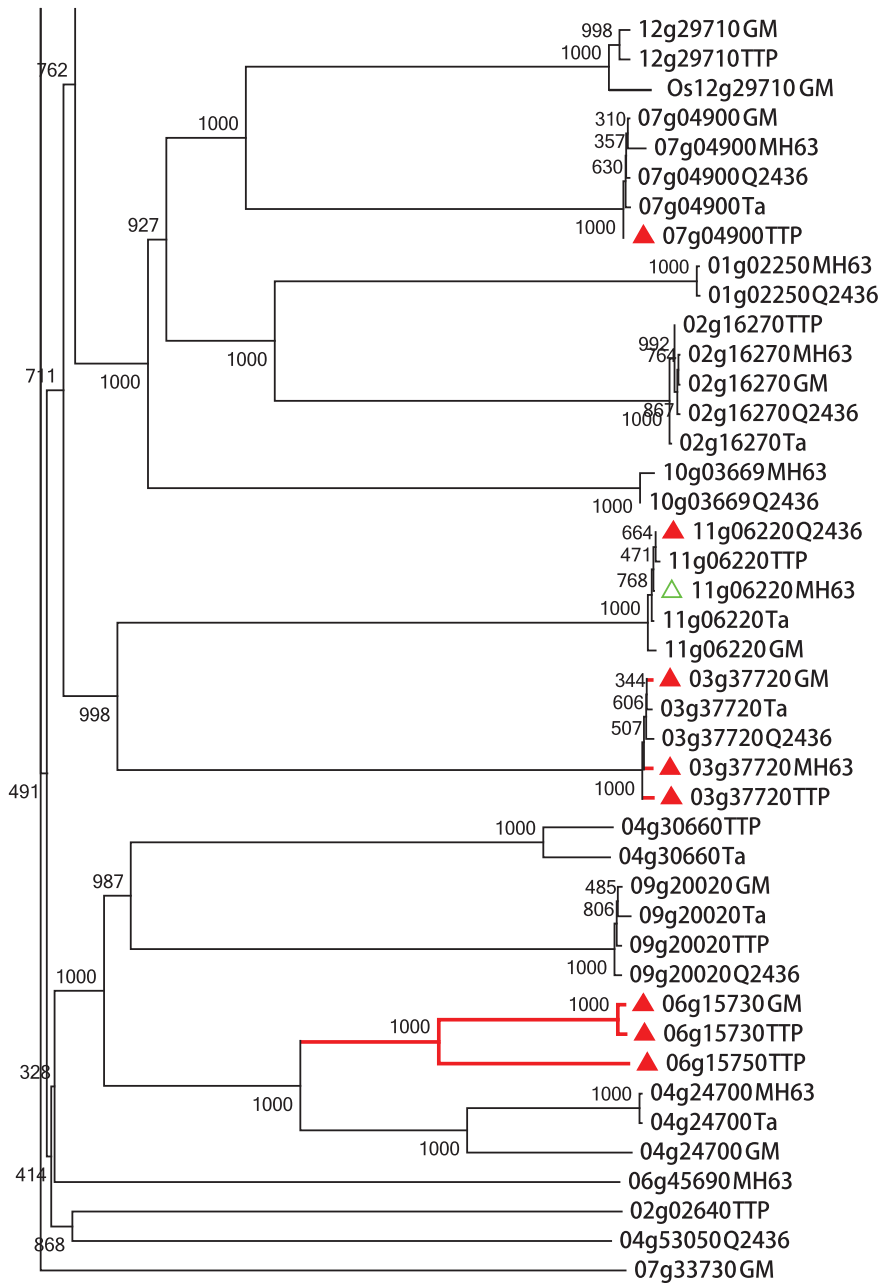

0.02

**Figure S5.** Phenotypes of control rice cultivars. The *R* represents that no evidence of infection was observed on the rice leaf; *MR* represents only brown specks with smaller than 1 mm in diameter but without sporulation on the leaf; *S* represents typical spindle-shaped blast lesions with at least 3 mm in diameter on the leaf

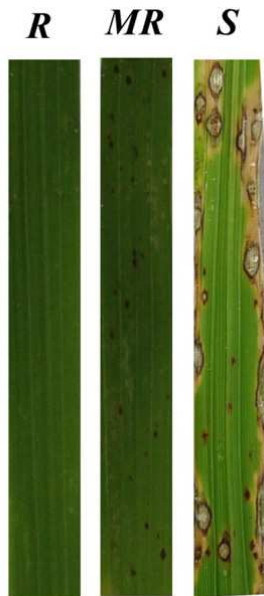

**Table S1.** List of rice cultivars used in this study.

| Items                                              | Rice cultivars<br>(Abbreviation)(Genotype) | Phenotype to rice blast             | Source                                                                                |
|----------------------------------------------------|--------------------------------------------|-------------------------------------|---------------------------------------------------------------------------------------|
| Gene donors<br>( <i>R</i> -cultivars)              | Tetep (TTP) ( <i>Indica</i> )              | High level of resistance            | China National Rice Research Institute,<br>Hangzhou, Zhejiang, China                  |
|                                                    | Gumei2 (GM2) ( <i>Indica</i> )             | High level of resistance            |                                                                                       |
|                                                    | Minghui63 (MH63)<br>( <i>Indica</i> )      | Intermediate level of<br>resistance |                                                                                       |
|                                                    | Tadukan (TDK) ( <i>Indica</i> )            | Intermediate level of<br>resistance |                                                                                       |
|                                                    | Q2436 (Q) ( <i>Indica</i> )                | Intermediate level of<br>resistance | Dr. Qinhua Pan at South China Agricultural<br>University, Guangzhou, Guangdong, China |
| Transgenic<br>recipients<br>( <i>S</i> -cultivars) | Shin2 (SH) ( <i>Japonica</i> )             | High level of<br>susceptibility     | Dr. Cailin Wang at Jiangsu Academy of<br>Agricultural Sciences, Nanjing, China        |
|                                                    | TP309 (TP) ( <i>Japonica</i> )             | High level of<br>susceptibility     |                                                                                       |

*R*, Resistance; *S*, Susceptibility. Phenotypes are based on both published observations and our screen of rice blast isolates (references and screening details in Table S8).



**Table S2.** List of the 155 primer pairs of these cloned genes

| gene loci | primer name | primer sequence (5' to 3')       | Restriction site (RS) |
|-----------|-------------|----------------------------------|-----------------------|
| AP005316  | AP005316-F  | ACAGGCGCGCCAAGCTATTTTCGTGGGCGTCT | AscI                  |
|           | AP005316-R  | GAAGGCGCGCCATCCACAAGCGCGACCTAAT  |                       |
| 01g02250  | 01g02250-F  | AAGGCGCGCCTTCATCATTTTGCATCCAC    | AscI                  |
|           | 01g02250-R  | AAGGCGCGCCTGAGATTGGTATGGACTTTG   |                       |
| 01g05600  | 01g05600-F  | CCTGGTACCGGGCATGTTTCAGAGACTCGT   | SalI KpnI             |
|           | 01g05600-R  | CTCGTTCGACGCTCAGGGCAACCAATTAAC   |                       |
| 01g16390  | 01g16390-F  | AAGGCGCGCCGATTCTCTGAGCGGGTTCAT   | AscI                  |
|           | 01g16390-R  | ATGGCGCGCCTGGGCATCAGAACGGTTGTA   |                       |
| 01g16400  | 01g16400-F  | AAGGCGCGCCCCGCTTGGTGTTCGATATTTA  | AscI                  |
|           | 01g16400-R  | AAGGCGCGCCAGGTGTCTCTCAGGCGTAT    |                       |
| 01g20720  | 01g20720-F  | AAGGCGCGCCAGCACCTGCACGATGACTAC   | AscI                  |
|           | 01g20720-R  | AAGGCGCGCCCCGAACAACCCTCCTAATCA   |                       |
| 01g21240  | 01g21240-F  | CAGGTCGACGTTTGAGACCGAAGGCAGAC    | SalI XbaI             |
|           | 01g21240-R  | TCCTCTAGACTTGATGAAAAGATACGGGA    |                       |
| 01g23380  | 01g23380-F  | AAGGCGCGCCGGGTGCCATTATGTCTCAGA   | AscI                  |
|           | 01g23380-R  | AAGGCGCGCCGACCCACCATCATTAGCAG    |                       |
| 01g24820  | 01g24820-F  | AAGGCGCGCCAGGTCGGTGAATTTCTCGGT   | AscI                  |
|           | 01g24820-R  | AAGGCGCGCCGGAGGAGTTTGGCTAGTCA    |                       |
| 01g25740  | 01g25740-F  | CGGGCGCGCCTGGGCAAGTTTCATGTCAAT   | AscI                  |
|           | 01g25740-R  | CGGGCGCGCCTTCTCTTATGGGCAGCAAT    |                       |
| 01g35250  | 01g35250-F  | CAAGTCGACATGCGGACTGATGTGAGGTT    | SalI                  |
|           | 01g35250-R  | CCAGGTACCGCCGATTACAGCAGGATACTC   |                       |
| 01g57270  | 01g57270-F  | TCTGGCGCGCCGCTGGTGCCTGGTTCATCTAT | AscI                  |
|           | 01g57270-R  | GGAGGCGCGCCCCTTCTCCGTTCTCCCCTATT |                       |
| 01g57870  | 01g57870-F  | AAGGCGCGCCTGCCATCTTGTACGAGTTGC   | AscI                  |
|           | 01g57870-R  | AAGGCGCGCCTGCGACTTGAGGGACCTAGA   |                       |
| 01g72390  | 01g72390-F  | TTGGCGCGCCACTGTGACCGGCCTTAGATT   | AscI                  |
|           | 01g72390-R  | TAGGCGCGCCGTAGGAAGCCGACGACATCA   |                       |
| 01g72680  | 01g72680-F  | TTGGCGCGCCACAACCTAAATCACGCAACC   | AscI                  |
|           | 01g72680-R  | AAGGCGCGCCATTTCGGTGCAGACTTGTTCAG |                       |
| 02g02640  | 02g02640-F  | CGGGGTACCACCAGTAAACCAGACAAGTG    | KpnI BamHI            |
|           | 02g02640-R  | CGCGGATCCCCTATGGACTATGGTATTCAG   |                       |
| 02g09790  | 02g09790-F  | CTCGGTACCATAGAATTGAGCGCCCCGTA    | KpnI BamHI            |
|           | 02g09790-R  | AGAGGATCCTTGGGTGTAATGCCAGAAA     |                       |
| 02g16270  | 02g16270-F  | ATGGCGCGCCTCTGTAGCAAATATGGTGGC   | AscI                  |
|           | 02g16270-R  | ATGGCGCGCAAGCGTACCTGGAGATTAGC    |                       |
| 02g18510  | 02g18510-F  | CGCGGATCCTCTTATGAAACGACCATCTCC   | KpnI BamHI            |
|           | 02g18510-R  | CGGGGTACCACTCACCTTTACCTCACCT     |                       |
| 02g19750  | 02g19750-F  | CCGGAATTCAGCACATGGGACGCCTAGA     | EcoRI                 |
|           | 02g19750-R  | CGGGAATTCTAGGTTTGAATTGCCATGCC    |                       |
| 02g25900  | 02g25900-F  | TCGGCGCGCAATAGATTTCGAGCGTCATGG   | AscI                  |
|           | 02g25900-R  | TTGGCGCGCCCGCATATAGCAGGAACGTCA   |                       |
| 02g27540  | 02g27540-F  | AAGGCGCGCCTTGAACGACTTACGACGCTA   | AscI                  |
|           | 02g27540-R  | AAGGCGCGCCGCGGTGTTTGTGAGTACTT    |                       |
| 02g30150  | 02g30150-F  | AAGGCGCGCCTGTTAAACGAGAATGGCAT    | AscI                  |
|           | 02g30150-R  | AAGGCGCGCCACCTTCGGAAAATACTGCT    |                       |
| 03g20840  | 03g20840-F  | AAGGCGCGCCTGCGTTTGTATCATGTTCA    | AscI                  |
|           | 03g20840-R  | AAGGCGCGCCTCAAAGTTCACCTCTACCAA   |                       |
| 03g37720  | 03g37720-F  | GCAGAATTCGCCGATCCTTGTGTAGACTC    | EcoRI                 |
|           | 03g37720-R  | GGTGAATTCATCCATCCCAAGTAGCTC      |                       |
| 03g38330  | 03g38330-F  | AAGGCGCGCCTGCCTCTTCGGTACTATCA    | AscI                  |

|          |                           |                                                                     |       |       |
|----------|---------------------------|---------------------------------------------------------------------|-------|-------|
| 03g48320 | 03g38330-R<br>03g48320-F  | AAGGCGCGCCTGGAGATTGGATGCAGTATT<br>TTGGCGCGCCGGGCACATGCACATAGGACA    | AscI  |       |
| 03g50150 | 03g48320-R<br>03g50150-F  | TTGGCGCGCCCGGGAAGACCAACGATGAAG<br>ACGCGTCGACGCTCCTCCACTCTAACATC     | XbaI  | SaII  |
| 03g63200 | 03g50150-R<br>03g63200-F  | ACGCGTCGACATTTCGTCTGTGGCAGTTGAG<br>CGAGGCGCGCCATTCCATTGCAGCGTTATCG  | AscI  |       |
| 04g21890 | 03g63200-R<br>04g21890-F  | TCTGGCGCGCCCTGGTGCATGGCTAGTCGTC<br>AAGGGCGCGCCTAGTCTGATGCCTGTCTCCA  | BamHI |       |
| 04g24700 | 04g21890-R<br>04g24700-F  | TCAGGCGCGCCGGTTCGACAGGTAAGATAAGTC<br>TCGGCGCGCCTGATGCTTGAACACGGAATA | AscI  |       |
| 04g30660 | 04g24700-R<br>04g30660-F  | ACGGCGCGCCCTAACGGGAGCACACACTAA<br>ACGGCGCGCCGCTCAACCTGGCTATGGACG    | AscI  |       |
| 04g30930 | 04g30660-R<br>04g30930-F  | CGGGCGCGCCTACACATTCCTAAAACCCGA<br>AAGGCGCGCCATTTCATGCTGGTTTGGACT    | AscI  |       |
| 04g46300 | 04g30930-R<br>04g46300-F  | AAGGCGCGCCCGTAAGCTGTGTTTCGTCGTC<br>AAGGCGCGCCAGGCCAGGATGACTTACA     | AscI  |       |
| 04g53050 | 04g46300-R<br>04g53050-F  | AAGGCGCGCCTCGACTGTCTGTGGCATGT<br>AAGGCGCGCCACCTTACCCTCGGACTTT       | AscI  |       |
| 05g12770 | 04g53050-R<br>05g12770-F  | AAGGCGCGCCCATGACATTTCGCTCGATTT<br>AAGGCGCGCCTCTTTGAAGCACTGGCGATT    | AscI  |       |
| 05g16200 | 05g12770-R<br>05g16200-F  | ATGGCGCGCCTTGGCAGGCTTAATTGGAC<br>TAGGCGCGCCGACCTTCGACAATGGCTCCT     | AscI  |       |
| 05g23990 | 05g16200-R<br>05g23990-F  | TGGGCGCGCCAATAGGCTCTCCGCTGTCAC<br>CTGGAATCCGGCATAGTGGCATCGTTTGA     | EcoRI | SaII  |
| 05g30220 | 05g23990-R<br>05g30220-F  | GCGGTCGACTCTTCGACAGTCCAATCCTTC<br>TCGGCGCGCCTGTAGAGGTGACGGGCTTTC    | AscI  |       |
| 05g31530 | 05g30220-R<br>05g31530-F  | ACGGCGCGCCTGTCTGGATGCGTTTGTCTT<br>TCGGCGCGCCGTATGCGTGGATCGGTCTAG    | AscI  |       |
| 05g31570 | 05g31530-R<br>05g31570-F  | ACGGCGCGCCAAACTCGGATCATGCCATA<br>AGAGGCGCGCCAATACTTCAAATGCGTGTGT    | AscI  |       |
| 05g34220 | 05g31570-R<br>05g34220-F  | ATTGGCGCGCCTATGAGCATCTGAACCTACG<br>AAGGCGCGCCCGGTTGGATCTAAGAATGGT   | AscI  |       |
| 05g40150 | 05g34220-R<br>05g40150-F  | AAGGCGCGCCACTCGGGTTGTCCACTACTG<br>AAGGCGCGCCTGCCAGATAATGTCAACCAA    | AscI  |       |
| 05g40160 | 05g40150-R<br>05g40160-F  | AAGGCGCGCCAGACCTGCAACCTTCAACA<br>TCGGCGCGCCGGGTCGGTCCACTTTTGTTT     | AscI  |       |
| 06g06380 | 05g40160-R<br>06g06380-F  | ACGGCGCGCCTTGCCTGATGAGCGGTATCT<br>CGCGGATCCTAAGTCACGCTTAAAGTCCC     | KpnI  | BamHI |
| 06g06390 | 06g06380-R<br>06g06390-F  | CGGGGTACCACTGGAGATGCTTTCTTCC<br>ACGCGTCGACATTAGGGTCCGCAGGCTTTT      | EcoRI | SaII  |
| 06g06860 | 06g06390-R<br>06g06860-F  | CCGGAATTCAGCTCTTATCGCAGAGTCGC<br>TATGGCGCGCCAGCCTTCGGATAAATTGATA    | AscI  |       |
| 06g15730 | 06g06860-R<br>06g06860-2R | AAAGGCGCGCCTGGATTTGTGGAGTACCTGG<br>TATGGCGCGCCGCAAGAGGTTACAAGAGGGT  | AscI  |       |
| 06g15750 | 06g15730-F<br>06g15730-R  | ACGGCGCGCCTCAGATGGATGGGCACTTAT<br>TCGGCGCGCCGCTCAGCACAAATCTTCAAG    | AscI  |       |
| 06g17880 | 06g15750-F<br>06g17880-F  | ACGGCTGCAGCGCATTACTCATCCTCTAAA<br>CCGGAATTCATAAGCAGAATAGCATATCACTG  | PstI  | EcoRI |
| 06g17950 | 06g17880-R<br>06g17950-F  | CGGGGTACCTGCTGAACAAGGTGTAGAGG<br>CCGCTCGAGCAAGGCGAAAGACAGATAAA      | XhoI  | KpnI  |
| 06g20050 | 06g17950-R<br>06g20050-F  | TTGGCGCGCCGATGCGAAAGAAGCCCGATAC<br>TTGGCGCGCCTGGTTAAGGACCTGCACTCC   | AscI  |       |
| 06g22460 | 06g20050-R<br>06g22460-F  | AAGGCGCGCCTCTCGATGTTCTAGCTTAA<br>AAGGCGCGCCTTGTTAGGAAGTTGCGAATC     | AscI  |       |
|          |                           | TCGGCGCGCCTTGGGACGAAGGGAGTACAT                                      | AscI  |       |

The Plant Journal

|          |            |                                   |       |       |
|----------|------------|-----------------------------------|-------|-------|
|          | 06g22460-R | ACGGCGCGCCTGTGGGGTGAACGACAAGTG    |       |       |
| 06g41670 | 06g41670-F | AAAGGCGCGCCTGGGTTGCCTGTTGACTGAT   | AscI  |       |
|          | 06g41670-R | AAAGGCGCGCCGATTTATGCCGCTGTATTGC   |       |       |
| 06g45690 | 06g45690-F | CGGGGTACCTTTTCGATCTATTCCGGGTAC    | SalI  | KpnI  |
|          | 06g45690-R | ACGCGTCGACGTGACTCGGCTGTTTCTGCT    |       |       |
| 06g48520 | 06g48520-F | AAGGCGCGCCTCAGCCAAATCGTACACCAT    | AscI  |       |
|          | 06g48520-R | AAGGCGCGCCAAAGGTACAGCAAGCCAGAA    |       |       |
| 07g04900 | 07g04900-F | AAGGCGCGCCTGGCATTAGCACATTAGA      | AscI  |       |
|          | 07g04900-R | AAGGCGCGCCTGCTTACGAACCTACCCAAT    |       |       |
| 07g08890 | 07g08890-F | ATGGCGCGCCTTACCGTTGCATTGGCTTAC    | AscI  |       |
|          | 07g08890-R | AAGGCGCGCCTTCCATTGTTTCGCCCTAC     |       |       |
| 07g17220 | 07g17220-F | TTCGAGCTCGGTACCCGTTGAAGCTTTGTGG   | KpnI  |       |
|          | 07g17220-R | GGATCCCCGGGTACCTAATCGGCTGGTGGCATA |       |       |
| 07g17230 | 07g17230-F | AAGGCGCGCCCCGATGGTTAGTGGGTCTTC    | AscI  |       |
|          | 07g17230-R | AAGGCGCGCCATGAGCGTCCGTAATAGTGG    |       |       |
| 07g27370 | 07g27370-F | CGCGGATCCATTGCTCCATTGTCAGAAGA     | BamHI |       |
|          | 07g27370-R | CGCGGATCCCCATGAGCTACTGATTGTT      |       |       |
| 07g33730 | 07g33730-F | AAGGCGCGCCAACGCCATTTAGGTGATCTC    | AscI  |       |
|          | 07g33730-R | AAGGCGCGCCATAAAGTCTCGCTGTCAACG    |       |       |
| 08g01580 | 08g01580-F | ACGGCGCGCCTGGATGGGCGATATGATGTC    | AscI  |       |
|          | 08g01580-R | TCGGCGCGCCCGGATTGGTTTGAGCAAGTT    |       |       |
| 08g05800 | 08g05800-F | AAGGCGCGCCATGGATCACTTCACGAACCTA   | AscI  |       |
|          | 08g05800-R | AAGGCGCGCCTTTGGTTGGTTCAGTCATAC    |       |       |
| 08g07340 | 08g07340-F | AAGGCGCGCCAGAACCAGGAGGAGATGAAT    | AscI  |       |
|          | 08g07340-R | TTGGCGCGCCTCCGATTGTGGTTCAGTAGTT   |       |       |
| 08g07390 | 08g07390-F | TCGGCGCGCCACAAATCAACCTGGCTACA     | AscI  |       |
|          | 08g07390-R | ACGGCGCGCCTCCGACGATGACAACCTCTA    |       |       |
| 08g07774 | 08g07774-F | CATGGCGCGCCCAACCAATGGCAACAAATC    | AscI  |       |
|          | 08g07774-R | TAAGGCGCGCCGTGAGAATTTGGCAGCTTGA   |       |       |
| 08g09110 | 08g09110-F | ACGCGTCGACCAGTACCCCATGTATTACCA    | EcoRI | SalI  |
|          | 08g09110-R | CCGGAATTCGTACCATATTCTATTTCGTCCC   |       |       |
| 08g09430 | 08g09430-F | AAGGCGCGCCTAGCTGGCAAGGATGTGACA    | AscI  |       |
|          | 08g09430-R | AAGGCGCGCCGATAGCGGCATGATAGTGT     |       |       |
| 08g10430 | 08g10430-F | GTGGCGCGCCTTAGTTCACATGCACGTACAAGA | AscI  |       |
|          | 08g10430-R | GAGGCGCGCCATCACACATTACTACCGCCTAT  |       |       |
| 08g14830 | 08g14830-F | ACGCGTCGACGGATATGATTCTGGACGCTC    | EcoRI | SalI  |
|          | 08g14830-R | CCGGAATTCACGCTAGTTGCTACCCCTTA     |       |       |
| 08g15880 | 08g15880-F | ACGCGTCGACAACCCTGCTCCTCAACCTAT    | EcoRI | SalI  |
|          | 08g15880-R | CCGGAATTCCTAAGCACCTTATTCAAAC      |       |       |
| 08g16070 | 08g16070-F | CTCGGTACCAGCGGACTTGCTACGTTCTA     | KpnI  | XbaI  |
|          | 08g16070-R | GACTCTAGAGGATCTTTCAAGGAGCCATA     |       |       |
| 08g16120 | 08g16120-F | CCGGAATTCACGGTGTCTACGGATACTGA     | XbaI  | EcoRI |
|          | 08g16120-R | TGCTCTAGATCAAAGGAACTTCATAGGATAG   |       |       |
| 08g16460 | 08g16460-F | CGGGGTACCCTTCGTGGTGAATGGTTGT      | XhoI  | KpnI  |
|          | 08g16460-R | CCGCTCGAGGTGGCATCAGTTGATAATAGTG   |       |       |
| 08g19694 | 08g19694-F | ACGCGTCGACTGCCTACCATACTAATCCA     | EcoRI | SalI  |
|          | 08g19694-R | CCGGAATTCGTTCCGCTAATCCCTCTGTC     |       |       |
| 08g28540 | 08g28540-F | AAGGCGCGCCATGTCCCTGTATATGATTCG    | AscI  |       |
|          | 08g28540-R | AAGGCGCGCCGTGCAATCGCTACAATGGAG    |       |       |
| 08g32880 | 08g32880-F | TGCTCTAGAGTTAGGCATAAGACATAGGAAT   | XbaI  | SalI  |
|          | 08g32880-R | ACGCGTCGACAGTAAGCACTCACAGCACAG    |       |       |
| 08g32890 | 08g32890-F | CCGGAATTCAAACAGCCAAGATAAATGACA    | EcoRI | SalI  |
|          | 08g32890-R | ACGCGTCGACCTAATAAACACTCGCACAGG    |       |       |
| 08g43010 | 08g43010-F | ACGGCGCGCCTGCGTCGCTTGTCTGTAGG     | AscI  |       |
|          | 08g43010-R | TCGGCGCGCCGCGAGAAACCCCTCCTAGT     |       |       |

|          |                            |                                                                     |       |       |
|----------|----------------------------|---------------------------------------------------------------------|-------|-------|
| 08g43050 | 08g43050-F<br>08g43050-R   | CGTGGCGCGCCTGCCAGATACAGAATTACGA<br>TTAGGCGCGCCGAAGCAACAGGGAAGGTATG  | AscI  |       |
| 09g13820 | 09g13820-F<br>09g13820-R   | AAGGCGCGCCCCCTTGCTAGACTCAGACTG<br>AAGGCGCGCCTATCTATGGGCAACTGCTGT    | AscI  |       |
| 09g14450 | 09g14450-F<br>09g14450-R   | AAGGCGCGCCAGGGGTGATCTAAATTCCAA<br>AAGGCGCGCCTTCTCCAACCATGTATGAT     | AscI  |       |
| 09g16000 | 09g16000-F<br>09g16000-R   | AAGGCGCGCCGAGTGGTCGCTACATGAAGA<br>AAGGCGCGCCAAGCTGAGGAGGATTATGTT    | AscI  |       |
| 09g20020 | 09g20020-F<br>09g20020-R   | AATGGCGCGCCTTAGTGGGCTCTTACGGTCT<br>AAAGGCGCGCCCCGCTTCTATCCACTCGTTCT | AscI  |       |
| 09g30220 | 09g30220-F<br>09g30220-R   | CCAGGCGCGCCCAGGTTGAGGTACGTCGATT<br>AACGCGCGCCCCGATTGGGTGTATAGTTCC   | AscI  |       |
| 10g03669 | 10g03669-F<br>10g03669-R   | AAGGCGCGCCCCGTGTGCTTAATGGGTTGAT<br>AAGGCGCGCCCCCTCGTCTTATTTGCGTCTG  | AscI  |       |
| 10g04060 | 10g04060-F<br>10g04060-R   | AAGGCGCGCCCATTTTCGTCTGCCGTTCAAC<br>ATGGCGCGCCCCGTGTCAGAAGAAGCGTA    | AscI  |       |
| 10g04090 | 10g04090-F<br>10g04090-R   | AAGGCGCGCCGAAAACCAAGCTCATCAA<br>AAGGCGCGCCTTCAAGTGTGGCAAGCTAGT      | AscI  |       |
| 10g07400 | 10g07400-F<br>10g07400-R   | ATGGCGCGCCAACAATGCCTCGACCAACT<br>AGGGCGCGCCACCGTAGGCCAATTCTCTTC     | AscI  |       |
| 10g10360 | 10g10360-F<br>10g10360-R   | CGGGGTACCATAAACTCGTCCTGTCTGGT<br>CCGGAATTCATAGGGCTTACTTAGGGTC       | EcoRI | KpnI  |
| 10g22510 | 10g22510-F<br>10g22510-R   | AAGGCGCGCCTTCTACGTTGGTGTCTTGA<br>AAGGCGCGCCGCTGACGTTCTGTGGTAAGT     | AscI  |       |
| 11g03650 | 11g03650-F<br>11g03650-R   | CCGCTCGAGAAACAGGAAGGGATGAACAA<br>CCGGAATTCAAATATGCCACAGCTAGTGC      | XhoI  | EcoRI |
| 11g06220 | 11g06220-F<br>11g06220-R   | TCGGCGCGCCGACAAACCGGAGAAATCAAT<br>ACGGCGCGCCGATGGAGGAAGTAGACGGCA    | AscI  |       |
| 11g11770 | 11g11770-F<br>11g11770-R   | AAGGCGCGCCACCATTGTTCCAGGACTTAT<br>AAGGCGCGCCTGCCTAGACTTGTATGATGA    | AscI  |       |
| 11g11960 | 11g11960-F<br>11g11960-R   | AATGGCGCGCCGGTCAAGTCGTCGCTGTCT<br>AACGGCGCGCCTTCGTGAATTTTCGCTTGT    | AscI  |       |
| 11g12040 | 11g12040-F<br>11g12040-R   | ACGGCGCGCCAGGGATCAAGTGGGCTATTC<br>TGCGGCGCGCCAGATTCGCCTGGTAACTCAC   | AscI  |       |
| 11g27430 | 11g27430-F<br>11g27430-R   | TTGGCGCGCCCTAACTGATGGATGCGTGAA<br>AAGGCGCGCCAGTTTGCATGTGCTGAGAGG    | AscI  |       |
| 11g27440 | 11g27440-F<br>11g27440-R   | CGGGGTACCAGTCTCCATCCCCGAAACTT<br>CCGCTCGAGTATTTTCAGAAAATAGCAGCACCTT | XhoI  | KpnI  |
| 11g29990 | 11g29990-F<br>11g29990-R   | AAGGCGCGCCATCCTCTGGTTCATCATCT<br>AAGGCGCGCCATCTCTCATCGGCCTAACTA     | AscI  |       |
| 11g32210 | 11g32210-F<br>11g32210-R   | TAAGGCGCGCCCTCTTGTACCTCGGCGGATG<br>TAAGGCGCGCCGCTTTCAGGCTTGCCAACG   | AscI  |       |
| 11g35210 | 11g35210-F<br>11g35210-R   | TCGGCGCGCCCCTTATGCGTGGGATTAGAA<br>ACGGCGCGCCCACTTGAAGCGTCCAGGGTA    | AscI  |       |
| 11g35580 | 11g35580-F<br>11g35580-R   | AGAGTCGACGACGTGGCTTACAAACAATG<br>CGTGGTACCTGTGATGGGCTCTAATATGC      | SalI  | KpnI  |
| 11g36410 | 11g36410-F<br>11g36410-R   | TCGGCGCGCCGACATTGACGTGGCATTAGA<br>ACGGCGCGCCTAAGGATACATAGCCGAAGG    | AscI  |       |
| 11g37740 | 11g37740-F<br>11g37740-R   | AATGGCGCGCCGAAGAGCCGTGCATGATTAG<br>AATGGCGCGCCTTCTCCTGATGCCGCTGTT   | AscI  |       |
|          | 11g37740-2F<br>11g37740-2R | AATGGCGCGCCGCGTCACATGGCAGTCTAAG<br>AAAGGCGCGCCCTCGTCGTCACCATTTCTCGT | AscI  |       |
| 11g37780 | 11g37780-F<br>11g37780-R   | CTAGTCTAGACTGGGACAAGGAATAATACA<br>ACGCGTCGACAACGGATAACAAGAACGAAT    | XbaI  | SalI  |
| 11g37870 | 11g37870-F                 | CCGGAATTCCTGAGTGAGTGAGAAATGCTGGAG                                   | PstI  | EcoRI |

|          |            |                                   |       |       |
|----------|------------|-----------------------------------|-------|-------|
|          | 11g37870-R | ACGGCTGCAGAGGAAGGGGACGGTGGGTGT    |       |       |
| 11g37880 | 11g37880-F | CCGGAATTTCCCATGACCGCTACCTCCAAG    | EcoRI | SalI  |
|          | 11g37880-R | ACGCGTCGACGGTAATGCAGATTTTCCCAACT  |       |       |
| 11g39290 | 11g39290-F | CTAGTCTAGATAGGATGTCGTATTGGGTATT   | XbaI  | SalI  |
|          | 11g39290-R | ACGCGTCGACACGACTTATTGACTTGCTG     |       |       |
| 11g39320 | 11g39320-F | CCGGAATTCAGCCAACCTTCGTGTCTATC     | XhoI  | EcoRI |
|          | 11g39320-R | CCGCTCGAGTGAATCCTTCTACAGGCAAT     |       |       |
| 11g39330 | 11g39330-F | AAGGCGCGCCTCCGTGTGGTGAGAGATGCT    | AscI  |       |
|          | 11g39330-R | AAGGCGCGCCATGTTGCCAAAGGGAGAGGT    |       |       |
| 11g39340 | 11g39340-F | GTGGGCGCGCCATCCTCAGGTATGCGACAAT   | AscI  |       |
|          | 11g39340-R | CTTGGCGCGCCGGCTAAATGGTGGTGACAGT   |       |       |
| 11g39730 | 11g39730-F | AAGGCGCGCCAATCTTCAGCTTCCCTTGA     | AscI  |       |
|          | 11g39730-R | AAGGCGCGCCATATCGCATGGACAGCTTAG    |       |       |
| 11g41540 | 11g41540-F | CGGGGTACCTTCTTGTGCGGAAACTTGTGA    | KpnI  | BamHI |
|          | 11g41540-R | CGCGGATCCCTCCCTTAAATAAAAATCCAGATC |       |       |
| 11g42580 | 11g42580-F | AAGGCGCGCCCTAGCTTGATCCGGCCAGAC    | AscI  |       |
|          | 11g42580-R | AAGGCGCGCCTAATTCATGGAGCAGGCGAT    |       |       |
| 11g43420 | 11g43420-F | AATGGCGCGCCTTGCTCCCTGGATTGAAC     | AscI  |       |
|          | 11g43420-R | TTGGCGCGCCGGACACTACTAGCCGTTGGA    |       |       |
| 11g43700 | 11g43700-F | AAGGCGCGCCTACCCTTCCACCTTAGTTCT    | AscI  |       |
|          | 11g43700-R | AAGGCGCGCCTTCATCTAGTGTGCAGGCAT    |       |       |
| 11g44960 | 11g44960-F | TTGGCGCGCCAGTCTTTCTTCTCACGCACCA   | AscI  |       |
|          | 11g44960-R | TTGGCGCGCCAAAGTGCCTGCACTGCCCAAAT  |       |       |
| 11g44970 | 11g44970-F | TCGGCGCGCCTTGCGATGCATTTGTGATTC    | AscI  |       |
|          | 11g44970-R | ACGGCGCGCCTTCATGGCTTCATAACAAGGT   |       |       |
| 11g45090 | 11g45090-F | CAAGGCGCGCCCCTGGGTTGTGGAGCATAG    | AscI  |       |
|          | 11g45090-R | CCAGGCGCGCCCAGAGGAGGGGTTAGGGCTA   |       |       |
| 11g45160 | 11g45160-F | TCGGCGCGCCGAACGGTGGCTTCTGGAATG    | AscI  |       |
|          | 11g45160-R | ACGGCGCGCCGGCGAGGTTGATGGTGGAGA    |       |       |
| 11g45190 | 11g45190-F | TTGGCGCGCCCTCGGAAGAGATGGAACAGTTG  | AscI  |       |
|          | 11g45190-R | TTGGCGCGCCCGGAGTTACCTACACACCTACA  |       |       |
| 11g45930 | 11g45930-F | ACGGCGCGCCCGCACTAGCACCATCCTGAA    | AscI  |       |
|          | 11g45930-R | TCGGCGCGCCACGCCACCGATTGAACTTA     |       |       |
| 11g45980 | 11g45980-F | AAGGCGCGCCGCTTCTTGCGGACTACTGTT    | AscI  |       |
|          | 11g45980-R | TTGGCGCGCCGTGTTGCCCTATTGATTTGT    |       |       |
| 11g47780 | 11g47780-F | AAGGCGCGCCTTAACCTGCATACCACTCGT    | AscI  |       |
|          | 11g47780-R | AAGGCGCGCCACGGGATAGGTGATTTCGACA   |       |       |
| 12g03080 | 12g03080-F | TATGGCGCGCCAGAAACAGCAACGGGAGTG    | AscI  |       |
|          | 12g03080-R | TATGGCGCGCCTGAGACAAAGGAGTGGCAGG   |       |       |
| 12g17410 | 12g17410-F | AAGGCGCGCCTTGATTCCCACTAAAACGCA    | AscI  |       |
|          | 12g17410-R | AAGGCGCGCCATTGGGTGGTGGACTAAGCA    |       |       |
| 12g29280 | 12g29280-F | TATGGCGCGCCCCAACCCAGCACCTATTCAA   | AscI  |       |
|          | 12g29280-R | AAAGGCGCGCCATCTCGTGCGGTCGTGTTAT   |       |       |
| 12g29710 | 12g29710-F | ACGGCGCGCCCCATCATCTAGTTATGCTAA    | AscI  |       |
|          | 12g29710-R | TCGGCGCGCCAGGGCTCTTACAGTAGGTTG    |       |       |
| 12g31200 | 12g31200-F | CCGGAATTCGGTTTGAAGCCGACTCGAT      | EcoRI |       |
|          | 12g31200-R | CCGGAATTCGTCTCAAGGAAGCGCATCTC     |       |       |
| 12g32790 | 12g32790-F | ACGGCGCGCCCTTGATTGTGTCGTCGAGTCT   | AscI  |       |
|          | 12g32790-R | GATGGCGCGCCGGGCTGTATATCGACCAAAC   |       |       |
| 12g36730 | 12g36730-F | ACGGCGCGCCGTTTGAAGCCGACTCGAT      | AscI  |       |
|          | 12g36730-R | TCGGCGCGCCGGTGGCACAGACTCCTAATA    |       |       |

**Table S3.** List of the cloned genes and their donors. In the cloned 332 NBS-LRR genes, all have their own promoters and terminators except for 20 genes (6%) which are marked with CDS. Those genes have the rice promoter and terminator of *Pi9*.

| No. | Loci     | Donor | Gene/CDS length (bp) | No. | Loci     | Donor    | Gene/CDS length (bp) |      |
|-----|----------|-------|----------------------|-----|----------|----------|----------------------|------|
| 1   | 01g02250 | Q2436 | 5957                 | 47  | 02g18510 | TDK      | 6327                 |      |
| 2   | 01g02250 | MH63  | 5957                 | 48  | 02g19750 | MH63     | 6200                 |      |
| 3   | 01g05600 | Q2436 | 5945                 | 49  | 02g25900 | MH63     | 6414                 |      |
| 4   | 01g05600 | TTP   | 5945                 | 50  | 02g25900 | TTP      | 6414                 |      |
| 5   | 01g16390 | MH63  | 7585                 | 51  | 02g25900 | Q2436    | 6414                 |      |
| 6   | 01g16400 | GM2   | 6400                 | 52  | 02g27540 | TTP      | 6452                 |      |
| 7   | 01g16400 | MH63  | 6400                 | 53  | 02g27540 | Q2436    | 6452                 |      |
| 8   | 01g16400 | Q2436 | 6400                 | 54  | 02g27540 | GM2      | 6452                 |      |
| 9   | 01g16400 | TDK   | 6400                 | 55  | 02g30150 | GM2      | 6004                 |      |
| 10  | 01g20720 | Q2436 | 6830                 | 56  | 02g30150 | TDK      | 6004                 |      |
| 11  | 01g20720 | TDK   | 6830                 | 57  | 02g30150 | Q2436    | 6004                 |      |
| 12  | 01g20720 | GM2   | 6830                 | 58  | 02g30150 | TTP      | 6004                 |      |
| 13  | 01g20720 | MH63  | 6830                 | 59  | 03g20840 | TTP      | 7644                 |      |
| 14  | 01g21240 | TTP   | 7060                 | 60  | 03g20840 | Q2436    | 7644                 |      |
| 15  | 01g23380 | TDK   | 1780                 | CDS | 61       | 03g37720 | TTP                  | 6100 |
| 16  | 01g23380 | MH63  | 1780                 | CDS | 62       | 03g37720 | GM2                  | 6100 |
| 17  | 01g23380 | GM2   | 1780                 | CDS | 63       | 03g37720 | Q2436                | 6100 |
| 18  | 01g23380 | TTP   | 1780                 | CDS | 64       | 03g37720 | MH63                 | 6100 |
| 19  | 01g24820 | GM2   | 6000                 | 65  | 03g37720 | TDK      | 6100                 |      |
| 20  | 01g24820 | MH63  | 6000                 | 66  | 03g38330 | GM2      | 5241                 |      |
| 21  | 01g24820 | TTP   | 6000                 | 67  | 03g38330 | MH63     | 5241                 |      |
| 22  | 01g24820 | TDK   | 6000                 | 68  | 03g38330 | Q2436    | 5241                 |      |
| 23  | 01g24820 | Q2436 | 6000                 | 69  | 03g38330 | TTP      | 5241                 |      |
| 24  | 01g25740 | TTP   | 5662                 | 70  | 03g38330 | TDK      | 5241                 |      |
| 25  | 01g35250 | TTP   | 3500                 | CDS | 71       | 03g48320 | Q2436                | 7000 |
| 26  | 01g35250 | GM2   | 3500                 | CDS | 72       | 03g48320 | GM2                  | 7000 |
| 27  | 01g57270 | GM2   | 8002                 | 73  | 03g48320 | MH63     | 7000                 |      |
| 28  | 01g57340 | MH63  | 3899                 | CDS | 74       | 03g50150 | MH63                 | 5624 |
| 29  | 01g57340 | TTP   | 3899                 | CDS | 75       | 03g50150 | TTP                  | 5624 |
| 30  | 01g57870 | GM2   | 6000                 | 76  | 03g63200 | TTP      | 7284                 |      |
| 31  | 01g57870 | TDK   | 6000                 | 77  | 03g63200 | GM2      | 7284                 |      |
| 32  | 01g57870 | TTP   | 6000                 | 78  | 04g21890 | TDK      | 5300                 |      |
| 33  | 01g57870 | Q2436 | 6000                 | 79  | 04g24700 | GM2      | 7776                 |      |
| 34  | 01g57870 | MH63  | 6000                 | 80  | 04g24700 | TDK      | 7776                 |      |
| 35  | 01g72390 | TTP   | 5100                 | 81  | 04g24700 | MH63     | 7776                 |      |
| 36  | 01g72390 | MH63  | 5100                 | 82  | 04g30660 | TTP      | 4298                 |      |
| 37  | 01g72390 | TDK   | 5100                 | 83  | 04g30660 | TDK      | 4298                 |      |
| 38  | 01g72680 | TDK   | 5384                 | 84  | 04g30930 | TTP      | 6700                 |      |
| 39  | 01g72680 | Q2436 | 5384                 | 85  | 04g46300 | TDK      | 6100                 |      |
| 40  | 02g02640 | TTP   | 8812                 | 86  | 04g53050 | Q2436    | 7300                 |      |
| 41  | 02g09790 | TTP   | 5076                 | 87  | 05g12770 | TTP      | 6800                 |      |
| 42  | 02g16270 | GM2   | 4500                 | 88  | 05g12770 | TDK      | 6800                 |      |
| 43  | 02g16270 | Q2436 | 4500                 | 89  | 05g12770 | Q2436    | 6800                 |      |
| 44  | 02g16270 | MH63  | 4500                 | 90  | 05g12770 | GM2      | 6800                 |      |
| 45  | 02g16270 | TDK   | 4500                 | 91  | 05g16200 | GM2      | 6500                 |      |
| 46  | 02g16270 | TTP   | 4500                 | 92  | 05g16200 | Q2436    | 6500                 |      |

| No. | Loci     | Donor | Gene/CDS length (bp) | No. | Loci     | Donor | Gene/CDS length (bp) |
|-----|----------|-------|----------------------|-----|----------|-------|----------------------|
| 93  | 05g16200 | MH63  | 6500                 | 142 | 07g08890 | Q2436 | 5917                 |
| 94  | 05g23990 | GM2   | 5700                 | 143 | 07g08890 | MH63  | 5917                 |
| 95  | 05g23990 | TTP   | 5700                 | 144 | 07g08890 | TDK   | 5917                 |
| 96  | 05g23990 | Q2436 | 5700                 | 145 | 07g08890 | TTP   | 5917                 |
| 97  | 05g30220 | TTP   | 7937                 | 146 | 07g17220 | GM2   | 6000                 |
| 98  | 05g30220 | GM2   | 7637                 | 147 | 07g17230 | Q2436 | 6626                 |
| 99  | 05g31530 | GM2   | 10827                | 148 | 07g17230 | TDK   | 6626                 |
| 100 | 05g31570 | Q2436 | 8200                 | 149 | 07g17230 | GM2   | 6626                 |
| 101 | 05g34220 | Q2436 | 7600                 | 150 | 07g17230 | MH63  | 6626                 |
| 102 | 05g34220 | GM2   | 7600                 | 151 | 07g27370 | GM2   | 5705                 |
| 103 | 05g34220 | MH63  | 7600                 | 152 | 07g27370 | TTP   | 5705                 |
| 104 | 05g40150 | TDK   | 7334                 | 153 | 07g27370 | MH63  | 5705                 |
| 105 | 05g40150 | TTP   | 7334                 | 154 | 07g33730 | GM2   | 7005                 |
| 106 | 05g40150 | Q2436 | 7334                 | 155 | 08g01580 | TTP   | 6733                 |
| 107 | 05g40160 | Q2436 | 6263                 | 156 | 08g01580 | GM2   | 6733                 |
| 108 | 05g40160 | TTP   | 6263                 | 157 | 08g01580 | Q2436 | 6733                 |
| 109 | 06g06380 | TTP   | 7491                 | 158 | 08g05800 | MH63  | 6438                 |
| 110 | 06g06380 | TDK   | 7491                 | 159 | 08g05800 | TTP   | 6438                 |
| 111 | 06g06380 | GM2   | 7491                 | 160 | 08g05800 | GM2   | 6438                 |
| 112 | 06g06380 | Q2436 | 7491                 | 161 | 08g05800 | TDK   | 6438                 |
| 113 | 06g06390 | TDK   | 6078                 | 162 | 08g05800 | Q2436 | 6438                 |
| 114 | 06g06390 | Q2436 | 6078                 | 163 | 08g07340 | TTP   | 5753                 |
| 115 | 06g06390 | GM2   | 6078                 | 164 | 08g07340 | Q2436 | 5753                 |
| 116 | 06g06390 | TTP   | 6078                 | 165 | 08g07390 | Q2436 | 8594                 |
| 117 | 06g06860 | Q2436 | 6999                 | 166 | 08g07390 | GM2   | 8594                 |
| 118 | 06g15730 | TTP   | 6067                 | 167 | 08g07774 | Q2436 | 7091                 |
| 119 | 06g15730 | GM2   | 6067                 | 168 | 08g09110 | TTP   | 6917                 |
| 120 | 06g15750 | TTP   | 6432                 | 169 | 08g09110 | TDK   | 6917                 |
| 121 | 06g17880 | TTP   | 6676                 | 170 | 08g09430 | TDK   | 5240                 |
| 122 | 06g17880 | MH63  | 6676                 | 171 | 08g09430 | GM2   | 5240                 |
| 123 | 06g17950 | Q2436 | 6200                 | 172 | 08g09430 | MH63  | 5240                 |
| 124 | 06g17950 | GM2   | 6200                 | 173 | 08g09430 | Q2436 | 5240                 |
| 125 | 06g20050 | GM2   | 6646                 | 174 | 08g10430 | TTP   | 7000                 |
| 126 | 06g22460 | TTP   | 5229                 | 175 | 08g10430 | GM2   | 7000                 |
| 127 | 06g22460 | GM2   | 5229                 | 176 | 08g10430 | TDK   | 7000                 |
| 128 | 06g41670 | Q2436 | 5468                 | 177 | 08g10430 | MH63  | 7000                 |
| 129 | 06g41670 | TTP   | 5468                 | 178 | 08g10430 | Q2436 | 7000                 |
| 130 | 06g45690 | MH63  | 6203                 | 179 | 08g14830 | TTP   | 5610                 |
| 131 | 06g48520 | GM2   | 4442                 | 180 | 08g14830 | MH63  | 5610                 |
| 132 | 06g48520 | MH63  | 4442                 | 181 | 08g15880 | TDK   | 7437                 |
| 133 | 06g48520 | TTP   | 4442                 | 182 | 08g15880 | Q2436 | 7437                 |
| 134 | 06g48520 | Q2436 | 4442                 | 183 | 08g15880 | GM2   | 7437                 |
| 135 | 06g48520 | TDK   | 4442                 | 184 | 08g16070 | MH63  | 6153                 |
| 136 | 07g04900 | TTP   | 6269                 | 185 | 08g16120 | TTP   | 6698                 |
| 137 | 07g04900 | GM2   | 6269                 | 186 | 08g16460 | TTP   | 6097                 |
| 138 | 07g04900 | MH63  | 6269                 | 187 | 08g16460 | MH63  | 6097                 |
| 139 | 07g04900 | Q2436 | 6269                 | 188 | 08g19694 | TTP   | 5880                 |
| 140 | 07g04900 | TDK   | 6269                 | 189 | 08g19694 | MH63  | 5880                 |
| 141 | 07g08890 | GM2   | 5917                 | 190 | 08g19694 | GM2   | 5880                 |

| No. | Loci     | Donor | Gene/CDS length (bp) | No. | Loci     | Donor | Gene/CDS length (bp) |
|-----|----------|-------|----------------------|-----|----------|-------|----------------------|
| 191 | 08g28540 | GM2   | 5572                 | 240 | 11g06220 | Q2436 | 3623 CDS             |
| 192 | 08g28540 | TTP   | 5572                 | 241 | 11g06220 | GM2   | 3623 CDS             |
| 193 | 08g28540 | MH63  | 5572                 | 242 | 11g11770 | Q2436 | 3405 CDS             |
| 194 | 08g28540 | Q2436 | 5572                 | 243 | 11g11960 | Q2436 | 5817                 |
| 195 | 08g28540 | TDK   | 5572                 | 244 | 11g12040 | Q2436 | 6200                 |
| 196 | 08g32880 | TTP   | 5392                 | 245 | 11g27430 | GM2   | 8000                 |
| 197 | 08g32890 | TTP   | 6253                 | 246 | 11g27430 | TDK   | 8000                 |
| 198 | 08g32890 | MH63  | 6253                 | 247 | 11g27440 | TTP   | 6519                 |
| 199 | 08g43010 | TTP   | 6958                 | 248 | 11g29990 | MH63  | 5768                 |
| 200 | 08g43010 | TDK   | 6958                 | 249 | 11g29990 | TTP   | 5768                 |
| 201 | 08g43050 | TTP   | 7000                 | 250 | 11g29990 | Q2436 | 5768                 |
| 202 | 08g43050 | TDK   | 7000                 | 251 | 11g29990 | TDK   | 5768                 |
| 203 | 08g43050 | MH63  | 7000                 | 252 | 11g32210 | TTP   | 9300                 |
| 204 | 09g13820 | GM2   | 6701                 | 253 | 11g32210 | GM2   | 9300                 |
| 205 | 09g13820 | TTP   | 6701                 | 254 | 11g32210 | MH63  | 9300                 |
| 206 | 09g13820 | TDK   | 6701                 | 255 | 11g32210 | Q2436 | 9300                 |
| 207 | 09g14450 | MH63  | 5064                 | 256 | 11g35210 | GM2   | 6523                 |
| 208 | 09g14450 | GM2   | 5064                 | 257 | 11g35210 | TTP   | 6523                 |
| 209 | 09g14450 | Q2436 | 5064                 | 258 | 11g35210 | Q2436 | 6523                 |
| 210 | 09g14450 | TDK   | 5064                 | 259 | 11g35580 | MH63  | 6240                 |
| 211 | 09g16000 | TTP   | 5507                 | 260 | 11g35580 | TTP   | 6240                 |
| 212 | 09g16000 | GM2   | 5507                 | 261 | 11g36410 | GM2   | 5837                 |
| 213 | 09g16000 | TDK   | 5507                 | 262 | 11g36410 | MH63  | 5837                 |
| 214 | 09g20020 | TTP   | 5913                 | 263 | 11g36410 | TDK   | 5837                 |
| 215 | 09g20020 | GM2   | 5913                 | 264 | 11g37740 | Q2436 | 5927                 |
| 216 | 09g20020 | Q2436 | 5913                 | 265 | 11g37780 | Q2436 | 6387                 |
| 217 | 09g20020 | TDK   | 5913                 | 266 | 11g37780 | GM2   | 6387                 |
| 218 | 09g30220 | TTP   | 5565                 | 267 | 11g37870 | GM2   | 5874                 |
| 219 | 09g30220 | TDK   | 5565                 | 268 | 11g37880 | TTP   | 6151                 |
| 220 | 09g30220 | MH63  | 5565                 | 269 | 11g37880 | TDK   | 6151                 |
| 221 | 09g30220 | GM2   | 5565                 | 270 | 11g37880 | Q2436 | 6151                 |
| 222 | 10g03369 | Q2436 | 6835                 | 271 | 11g39290 | TTP   | 5601                 |
| 223 | 10g03369 | MH63  | 6835                 | 272 | 11g39320 | TTP   | 6237                 |
| 224 | 10g04060 | MH63  | 8200                 | 273 | 11g39330 | TTP   | 4848                 |
| 225 | 10g04060 | TTP   | 8200                 | 274 | 11g39330 | MH63  | 4848                 |
| 226 | 10g04060 | Q2436 | 8200                 | 275 | 11g39330 | TDK   | 4848                 |
| 227 | 10g04090 | TTP   | 8072                 | 276 | 11g39340 | TTP   | 7418                 |
| 228 | 10g07400 | Q2436 | 7064                 | 277 | 11g39730 | MH63  | 2921 CDS             |
| 229 | 10g07400 | MH63  | 7064                 | 278 | 11g39730 | TDK   | 2921 CDS             |
| 230 | 10g07400 | TDK   | 7064                 | 279 | 11g39730 | Q2436 | 2921 CDS             |
| 231 | 10g10360 | TTP   | 5860                 | 280 | 11g39730 | TTP   | 2921 CDS             |
| 232 | 10g22510 | TTP   | 5786                 | 281 | 11g41540 | TTP   | 5066                 |
| 233 | 10g22510 | MH63  | 5786                 | 282 | 11g41540 | TDK   | 5066                 |
| 234 | 10g22510 | Q2436 | 5786                 | 283 | 11g42580 | Q2436 | 4438                 |
| 235 | 11g03650 | TTP   | 7138                 | 284 | 11g42580 | GM2   | 4438                 |
| 236 | 11g03650 | TDK   | 7138                 | 285 | 11g43420 | MH63  | 6400                 |
| 237 | 11g06220 | TDK   | 3623 CDS             | 286 | 11g43420 | TTP   | 6400                 |
| 238 | 11g06220 | TTP   | 3623 CDS             | 287 | 11g43420 | TDK   | 6400                 |
| 239 | 11g06220 | MH63  | 3623 CDS             | 288 | 11g43700 | MH63  | 5823                 |



| No. | Loci     | Donor | Gene/CDS length (bp) |     |
|-----|----------|-------|----------------------|-----|
| 289 | 11g43700 | TTP   | 5823                 |     |
| 290 | 11g43700 | Q2436 | 5823                 |     |
| 291 | 11g43700 | TDK   | 5823                 |     |
| 292 | 11g44960 | TTP   | 5200                 |     |
| 293 | 11g44970 | TTP   | 5288                 |     |
| 294 | 11g44970 | Q2436 | 5288                 |     |
| 295 | 11g44970 | GM2   | 5288                 |     |
| 296 | 11g45090 | TTP   | 5600                 |     |
| 297 | 11g45160 | TTP   | 4869                 |     |
| 298 | 11g45190 | TTP   | 5564                 |     |
| 299 | 11g45190 | MH63  | 5564                 |     |
| 300 | 11g45930 | TTP   | 6047                 |     |
| 301 | 11g45930 | Q2436 | 6047                 |     |
| 302 | 11g45980 | TTP   | 6727                 |     |
| 303 | 11g45980 | Q2436 | 6727                 |     |
| 304 | 11g47780 | Q2436 | 4824                 |     |
| 305 | 11g47780 | MH63  | 4824                 |     |
| 306 | 11g47780 | GM2   | 4824                 |     |
| 307 | 11g47780 | TDK   | 4824                 |     |
| 308 | 12g03080 | TTP   | 9970                 |     |
| 309 | 12g03080 | GM2   | 9970                 |     |
| 310 | 12g03080 | Q2436 | 9970                 |     |
| 311 | 12g17410 | TTP   | 7409                 |     |
| 312 | 12g17410 | MH63  | 7409                 |     |
| 313 | 12g29710 | GM2   | 6874                 |     |
| 314 | 12g29710 | TTP   | 6874                 |     |
| 315 | 12g29280 | TTP   | 6800                 |     |
| 316 | 12g29280 | GM2   | 6800                 |     |
| 317 | 12g29280 | Q2436 | 6800                 |     |
| 318 | 12g29280 | MH63  | 6800                 |     |
| 319 | 12g29280 | TDK   | 6800                 |     |
| 320 | 12g31200 | TTP   | 3800                 | CDS |
| 321 | 12g31200 | GM2   | 3800                 | CDS |
| 322 | 12g32790 | Q2436 | 5496                 |     |
| 323 | 12g32790 | TDK   | 5496                 |     |
| 324 | 12g32790 | MH63  | 5496                 |     |
| 325 | 12g32790 | TTP   | 5496                 |     |
| 326 | 12g32790 | GM2   | 5496                 |     |
| 327 | 12g36730 | TTP   | 6488                 |     |
| 328 | 12g36730 | Q2436 | 6488                 |     |
| 329 | 12g36730 | GM2   | 6488                 |     |
| 330 | Ap005316 | GM2   | 7500                 |     |
| 331 | Ap005316 | TTP   | 7500                 |     |
| 332 | Ap005316 | Q2436 | 7500                 |     |

**Table S4.** Locations of the collected isolates of *M.oryzae* used in this study. These isolates were maintained at Nanjing University, Nanjing, China.

| Isolates | Collected locations                                  | Collected years |
|----------|------------------------------------------------------|-----------------|
| YN1      | Dali, Yunnan Province at the far southwest of China. | 2008            |
| YN2      | Yuxi, Yunnan Province at the far southwest of China  | 2008            |
| SC1      | Ya'an, Sichuan Province at west of China             | 2009            |
| SC2      | Mianyang, Sichuan Province at west of China          | 2009            |
| CQ1      | Beibei, Chongqing city at southwest of China         | 2009            |
| CQ2      | Wuqi, Chongqing city at southwest of China           | 2009            |
| HB1      | Wuhan, Hubei Province at central part of China       | 2008            |
| AH1      | Liu'an, Anhui Province at central part of China      | 2009            |
| JS1      | Nanjing, Jiangsu Province at east of China           | 2008            |
| JS2      | Nantong, Jiangsu Province at east of China           | 2008            |
| GD1      | Guangzhou, Guangdong Province at south of China      | 2009            |
| LN1      | Dandong, Liaoning Province at north of China         | 2009            |





|           |       |    |    |   |    |    |    |    |    |    |    |    |    |    |    |    |    |    |    |    |    |    |    |
|-----------|-------|----|----|---|----|----|----|----|----|----|----|----|----|----|----|----|----|----|----|----|----|----|----|
| 08g01580  | GM2   | SH | S  | S | S  | S  | R  | S  | S  | S  | R  | S  | S  | ND | S  | ND |
| 08g01580  | GM2   | TP | R  | R | S  | ND | S  | R  | S  | S  | R  | ND | ND | R  | ND | ND | ND | R  | ND | S  | ND | R  | ND |
| 08g01580  | Q2436 | TP | S  | S | S  | R  | ND | ND | S  | S  | R  | ND | S  | ND |
| 08g07340  | Q2436 | SH | R  | S | S  | S  | R  | R  | S  | S  | S  | ND | ND | R  | ND | ND | ND | S  | ND | R  | ND | S  | ND |
| 08g07340  | TTP   | TP | S  | S | S  | S  | ND | ND | S  | S  | R  | S  | S  | ND |
| 08g07390  | Q2436 | SH | R  | S | S  | S  | S  | S  | S  | R  | S  | ND |
| 08g07390  | Q2436 | TP | ND | S | S  | ND | ND | R  | S  | S  | R  | S  | S  | ND |
| 08g09110  | TTP   | TP | R  | S | S  | R  | ND | ND | S  | S  | R  | S  | S  | ND |
| 08g10430  | TTP   | SH | S  | S | S  | ND | S  | R  | S  | ND | ND | S  | S  | R  | R  | R  | S  | S  | S  | S  | ND | ND | ND |
| 08g10430  | MH63  | TP | ND | R | S  | S  | ND | ND | S  | S  | S  | S  | S  | ND |
| 08g10430  | Q2436 | TP | R  | S | S  | S  | ND | S  | S  | S  | R  | ND | S  | S  | S  | ND |
| 08g15880  | Q2436 | SH | R  | S | R  | S  | R  | S  | S  | S  | S  | ND | ND | R  | ND | ND | ND | S  | ND | R  | ND | R  | ND |
| 08g15880  | GM2   | SH | R  | S | S  | S  | R  | S  | S  | S  | S  | ND | ND | R  | ND | ND | ND | ND | ND | R  | R  | ND | R  |
| 08g15880  | Q2436 | TP | S  | S | S  | S  | S  | R  | S  | S  | S  | ND |
| 08g15880  | GM2   | TP | R  | S | S  | R  | R  | R  | S  | S  | R  | S  | S  | S  | R  | ND | ND | ND | ND | R  | S  | ND | R  |
| 08g16120  | TTP   | SH | ND | S | R  | S  | ND | ND | S  | S  | ND | S  | S  | ND |
| 08g16460  | MH63  | SH | R  | S | S  | R  | ND | ND | R  | S  | S  | R  | S  | ND |
| 08g19690  | TTP   | SH | ND | S | S  | S  | ND | ND | R  | R  | S  | S  | S  | ND |
| 08g19690  | MH63  | SH | ND | S | R  | S  | ND | ND | S  | S  | S  | S  | S  | ND |
| 08g32890  | TTP   | SH | S  | S | S  | S  | ND | ND | S  | R  | R  | R  | S  | ND |
| 08g43010  | TDK   | SH | S  | S | S  | R  | R  | R  | S  | S  | S  | ND |
| 08g43050  | TDK   | SH | S  | S | S  | S  | S  | S  | ND | S  | ND | ND | ND | S  | ND | ND | ND | ND | ND | R  | R  | ND | S  |
| 08g43050  | TTP   | SH | R  | S | S  | S  | S  | ND | S  | S  | ND | ND | ND | S  | ND | ND | ND | ND | ND | R  | R  | ND | S  |
| 08g43050  | MH63  | SH | S  | S | S  | S  | R  | ND | S  | S  | ND | ND | ND | S  | ND | ND | ND | ND | ND | R  | R  | ND | S  |
| 08g43050  | TTP   | TP | R  | S | S  | S  | S  | S  | ND | S  | ND | ND | ND | S  | ND | ND | ND | ND | ND | R  | R  | ND | S  |
| 09g30220  | GM2   | TP | S  | S | S  | S  | S  | S  | R  | R  | S  | ND |
| 11g06220  | Q2436 | TP | S  | S | R  | ND | ND | R  | R  | R  | R  | ND | S  | ND |
| 11g27440  | TTP   | SH | S  | S | ND | S  | S  | R  | S  | S  | ND | S  | S  | R  | S  | R  | S  | S  | S  | S  | ND | ND | ND |
| 11g32210  | GM2   | SH | S  | S | R  | ND | ND | R  | S  | S  | S  | S  | ND |
| 11g35210* | TTP   | SH | R  | S | S  | S  | R  | ND | S  | R  | R  | S  | ND | ND | S  | ND |
| 11g35580  | MH63  | SH | ND | S | S  | S  | ND | S  | R  | S  | R  | ND |
| 11g35580  | TTP   | SH | S  | S | S  | S  | S  | S  | S  | S  | S  | ND | ND | S  | ND | ND | ND | ND | ND | R  | R  | ND | S  |

|           |       |    |    |   |   |    |    |    |    |    |    |    |    |    |    |    |    |    |    |    |    |    |    |   |
|-----------|-------|----|----|---|---|----|----|----|----|----|----|----|----|----|----|----|----|----|----|----|----|----|----|---|
| 11g35580  | TTP   | TP | R  | S | S | ND | ND | S  | S  | S  | S  | ND |   |
| 11g37780  | Q2436 | SH | S  | S | S | R  | R  | S  | S  | S  | S  | ND |   |
| 11g37780  | GM2   | SH | R  | S | R | R  | S  | S  | S  | S  | S  | S  | S  | ND | S  | ND |   |
| 11g37780  | Q2436 | TP | S  | S | S | S  | R  | R  | S  | S  | S  | ND |   |
| 11g37780  | GM2   | TP | ND | S | S | S  | S  | R  | ND | S  | S  | S  | ND |   |
| 11g37870  | GM2   | TP | S  | S | S | S  | R  | S  | S  | S  | S  | ND |   |
| 11g37880  | TDK   | SH | ND | S | R | S  | ND | S  | R  | R  | ND | S  | S  | ND |   |
| 11g37880  | Q2436 | SH | R  | S | S | R  | R  | S  | S  | S  | S  | S  | S  | ND | S  | ND | ND | ND | ND | ND | R  | S  | ND | S |
| 11g37880  | Q2436 | TP | ND | S | S | ND | S  | R  | S  | S  | S  | S  | ND |   |
| 11g39320  | TTP   | SH | ND | S | R | S  | ND | ND | R  | R  | S  | S  | R  | ND |   |
| 11g39330  | MH63  | TP | ND | S | S | S  | ND | ND | R  | S  | S  | S  | R  | S  | R  | ND | ND | ND | ND | ND | ND | R  | ND |   |
| 11g39340  | TTP   | TP | S  | S | S | S  | ND | S  | S  | S  | R  | ND |   |
| 11g41540  | TTP   | SH | S  | S | S | S  | S  | S  | S  | S  | ND | S  | S  | S  | R  | R  | S  | S  | S  | S  | ND | ND | ND |   |
| 11g41540  | TDK   | SH | ND | S | R | S  | ND | ND | R  | S  | S  | S  | R  | ND |   |
| 11g42580  | GM2   | TP | R  | S | R | ND | ND | S  | S  | S  | S  | ND | S  | ND |   |
| 11g44960  | TTP   | SH | S  | S | S | S  | R  | S  | S  | S  | S  | S  | S  | S  | ND | ND | ND | ND | ND | R  | R  | ND | S  |   |
| 11g44960  | TTP   | TP | S  | R | S | S  | S  | R  | S  | S  | R  | S  | S  | S  | S  | ND | ND | ND | ND | R  | S  | ND | R  |   |
| 11g44970* | Q2436 | SH | S  | S | R | S  | S  | S  | S  | S  | S  | ND |   |
| 11g44970* | GM2   | SH | S  | S | S | S  | ND | R  | S  | S  | R  | ND | S  | ND |   |
| 11g45090* | TTP   | SH | S  | S | R | ND | ND | R  | S  | S  | S  | ND |   |
| 11g45160* | TTP   | TP | S  | S | S | S  | ND | ND | S  | S  | R  | ND | S  | S  | R  | ND |   |
| 11g45190  | TTP   | TP | R  | S | R | S  | R  | S  | S  | S  | S  | S  | S  | S  | S  | ND | ND | ND | ND | R  | R  | ND | S  |   |
| 11g45190  | MH63  | TP | S  | R | R | R  | R  | R  | S  | S  | R  | S  | S  | R  | S  | ND | ND | ND | ND | R  | S  | R  | R  |   |
| 11g45930  | Q2436 | TP | S  | S | S | S  | S  | R  | S  | S  | S  | S  | S  | ND | S  | ND |   |
| 11g45980  | TTP   | SH | S  | R | S | S  | R  | S  | ND | ND | ND | ND | ND | R  | ND | ND | ND | S  | ND | R  | ND | S  | ND |   |
| 11g45980  | Q2436 | SH | S  | S | S | R  | S  | S  | S  | S  | R  | ND |   |
| 11g45980  | TTP   | TP | S  | S | S | S  | R  | S  | S  | ND | ND | ND | ND | S  | ND | ND | ND | S  | ND | S  | ND | S  | ND |   |
| 11g45980  | Q2436 | TP | ND | S | S | S  | S  | S  | R  | S  | S  | ND |   |
| 12g03080  | GM2   | SH | S  | R | R | R  | ND | S  | R  | R  | R  | ND | R  | S  | S  | ND |   |
| 12g03080  | GM2   | TP | S  | S | S | S  | ND | ND | S  | S  | R  | ND | S  | ND |   |
| 12g17410  | TTP   | TP | R  | S | S | ND | ND | R  | S  | S  | R  | ND | S  | ND |   |
| 12g29170  | GM2   | SH | S  | S | S | ND | R  | S  | S  | ND | S  | ND | S  | S  | ND | ND | ND | ND | ND | R  | S  | ND | S  |   |



|          |       |    |    |    |    |    |    |    |    |    |    |    |    |
|----------|-------|----|----|----|----|----|----|----|----|----|----|----|----|
| 11g32210 | MH63  | TP | S  | S  | S  | S  | S  | S  | S  | S  | M  | ND | ND |
| 11g32210 | Q2436 | SH | S  | M  | S  | S  | S  | S  | S  | S  | S  | ND | S  |
| 06g15730 | GM    | TP | M  | S  | S  | S  | S  | S  | S  | S  | S  | S  | ND |
| 11g39330 | TDK   | TP | S  | S  | ND | S  | R  | S  | S  | ND | ND | ND | S  |
| 07g17220 | GM    | TP | S  | S  | M  | S  | S  | S  | S  | S  | S  | ND | ND |
| AC-MH-12 | MH63  | TP | S  | S  | S  | S  | S  | S  | S  | S  | ND | ND | M  |
| 03g37720 | TTP   | SH | S  | S  | S  | M  | S  | S  | S  | S  | ND | ND | M  |
| AC-GM-3  | GM-3  | SH | S  | S  | S  | ND | ND | M  | S  | S  | S  | S  | S  |
| 06g48520 | TTP   | TP | S  | S  | ND | S  | S  | S  | M  | S  | ND | S  | S  |
| 05g23990 | Q2436 | TP | S  | S  | S  | S  | ND | M  | ND | ND | S  | S  | S  |
| 11g32210 | Q2436 | TP | S  | ND | S  | ND | S  | S  | ND | S  | M  | ND | S  |
| 12g03080 | TTP   | TP | S  | S  | S  | S  | S  | M  | ND | S  | S  | ND | S  |
| 12g03080 | Q2436 | TP | S  | S  | S  | ND | ND | S  | S  | S  | M  | ND | S  |
| 08g10430 | Q2436 | SH | S  | S  | S  | S  | ND | S  | S  | S  | M  | ND | S  |
| 08g10430 | GM    | TP | S  | S  | ND | S  | S  | ND | S  | S  | M  | S  | S  |
| 06g17950 | Q2436 | TP | S  | S  | M  | S  | S  | S  | S  | ND | ND | S  | S  |
| Ap005316 | GM    | TP | S  | M  | S  | S  | S  | S  | S  | ND | S  | S  | ND |
| Ap005316 | Q2436 | SH | S  | M  | S  | S  | S  | S  | S  | S  | ND | S  | ND |
| 08g07390 | GM    | SH | M  | S  | ND | S  | S  | S  | ND | S  | S  | S  | S  |
| 08g07390 | GM    | TP | S  | S  | S  | ND | S  | S  | ND | S  | M  | ND | S  |
| 06g06380 | Q2436 | TP | M  | ND | S  | S  | S  | S  | ND | S  | S  | S  | ND |
| 08g43050 | TDK   | TP | S  | S  | S  | S  | ND | S  | S  | S  | M  | S  | ND |
| 11g35210 | Q2436 | TP | S  | S  | ND | S  | ND | S  | S  | M  | S  | ND | S  |
| 6g17950  | GM    | SH | M  | ND | S  | S  | S  | ND | S  | S  | S  | ND | S  |
| 6g17950  | GM    | TP | S  | M  | ND | S  | S  | S  | ND | S  | S  | S  | S  |
| 05g30220 | GM    | SH | ND | S  | S  | S  | M  | S  | S  | S  | S  | ND | S  |

R, Resistance; S, Susceptibility; ND, Not determined; M, Moderate resistance

\* The names of 11 R-lines reported recently are Os11g35210-TTP-SH, Os05g30220-TTP-SH, Os05g30220-GM-TP, Os05g23990-TTP-SH, Os05g23990-TTP-TP, Os05g23990-Q2436-SH, Os05g23990-GM-SH, Os11g44970-Q2436-SH, Os11g44970-GM-SH, Os11g45160-TTP-TP and Os11g45090-TTP-SH, which correspond to OspTetep-Rp1F, OspTetep-Rp1G, OspGM-Rp1G, OspTetep-Rp3B-SH, OspTetep-Rp3B-TP, OspQ2436-Rp3B-SH, OspGM-Rp3B-SH, OspQ2436-AC-C-SH, OspGM-AC-C-SH, OspTTP-1-AC-C-TP, and OspTTP-2-AC-C-SH, respectively in Yang et al. 2013.



**Table S6.** Phenotypic results of transgenic rice lines inoculated by two *Xanthomonas oryzae* pv. *Oryzae* (*Xoo*) races, one Philippine strain (PXO61) and one Chinese strain (ZJ173), provided by Jiangsu Academy of Agricultural Sciences, China. All of the 11 screened transgenic lines in this table are of the 15 broadly effective *R*-lines (Table S11). Three to five uppermost fully expanded leaves of each plant and at least five plants (replicates) for each transgenic line were inoculated for each *Xoo* strain using the leaf clipping method (Chen et al., 2002) at three-week-old seedlings. The phenotype of disease was scored by measuring percent lesion area (lesion length/leaf length%  $\pm$  standard deviation) 14 days after inoculation (Sun et al., 2004 and Huang et al. 2008). To ensure the reliability of the screening experiment, a resistant rice control (DV85) to *Xoo* races was employed. The screened results showed that the lesion areas of the screened transgenic lines did not have a significant difference ( $P > 0.24$ ) compared to their transgenic recipients, SH or TP. In particular, the size of lesions on transgenic and paired-recipient lines did not differ ( $P > 0.05$ , ranging from 0.24 to 0.56 by *t*-test) when infected with PXO61 or ZJ173.

|                          | Gene ID    | Transgenic Donors | Transgenic Recipients | Phenotype about lesion areas (%) identified by <i>Xoo</i> races |                |
|--------------------------|------------|-------------------|-----------------------|-----------------------------------------------------------------|----------------|
|                          |            |                   |                       | PX061                                                           | ZJ173          |
| Controls of recipients   |            |                   | SH                    | 33.6 $\pm$ 2.2                                                  | 37.5 $\pm$ 4.6 |
|                          |            |                   | TP                    | 32.4 $\pm$ 4.2                                                  | 34.1 $\pm$ 4.1 |
| Controls of Donors       |            | TTP               |                       | 27.4 $\pm$ 3.3                                                  | 34.1 $\pm$ 4.9 |
|                          |            | GM2               |                       | 22.7 $\pm$ 1.8                                                  | 31.1 $\pm$ 3.2 |
|                          |            | Q2436             |                       | 29.4 $\pm$ 3.8                                                  | 26.2 $\pm$ 3.9 |
|                          |            | MH63              |                       | 15.6 $\pm$ 2.3                                                  | 32.1 $\pm$ 3.8 |
| Resistant control (DV85) |            |                   |                       | 8.1 $\pm$ 0.7                                                   | 6.9 $\pm$ 0.9  |
| Transgenic lines         | Os12g36730 | TTP               | SH                    | 34.8 $\pm$ 3.7                                                  | 42.3 $\pm$ 3.5 |
|                          | Os06g15750 | TTP               | SH                    | 31.3 $\pm$ 3.6                                                  | 34.6 $\pm$ 1.2 |
|                          | Os06g06380 | TTP               | SH                    | 29.9 $\pm$ 3.2                                                  | 35.6 $\pm$ 5.8 |
|                          | Os06g06390 | TTP               | SH                    | 35.6 $\pm$ 4.3                                                  | 39.9 $\pm$ 4.6 |
|                          | Os08g15880 | Q2436             | SH                    | 33.1 $\pm$ 3.9                                                  | 38.2 $\pm$ 3.6 |
|                          | Os08g07340 | Q2436             | SH                    | 33.7 $\pm$ 3.3                                                  | 36.3 $\pm$ 4.2 |
|                          | Os11g45190 | MH63              | TP                    | 34.9 $\pm$ 1.8                                                  | 33.7 $\pm$ 3.2 |
|                          | Os08g15880 | GM2               | TP                    | 33.7 $\pm$ 3.6                                                  | 37.1 $\pm$ 4.6 |
|                          | Os08g01580 | GM2               | TP                    | 31.9 $\pm$ 3.7                                                  | 36.4 $\pm$ 2.1 |
|                          | Os11g06220 | Q2436             | TP                    | 36.6 $\pm$ 3.1                                                  | 30.7 $\pm$ 3.6 |
|                          | Ap005316   | Q2436             | TP                    | 30.1 $\pm$ 4.2                                                  | 33.1 $\pm$ 3.5 |

1. Chen H, Wang S, Zhang Q. (2002) New gene for bacterial blight resistance in rice located on chromosome 12 identified from Minghui 63, an elite restorer line. *Phytopathology* 92: 750-754.
2. Sun X, Cao Y, Yang Z, Xu C, Li X, Wang S, Zhang Q. (2004) Xa26, a gene conferring resistance to *Xanthomonas oryzae* pv. *Oryzae* in rice, encodes an LRR receptor kinase-like protein. *Plant J* 37: 517-527.
3. Huang J-N, Wang C-C, Hu H-T, Ma B-J, Yan C-Q, Yang L. (2008) Primary identification of a new resistance gene to bacterial blight from *oryza meyeriana*. *Chinese J Rice Sci* 22: 33-37

**Table S7.** Evaluation of rice panicle blast resistance in an experimental paddy field at Nanjing University Xianlin Campus, China. 4×8 plants were planted for each rice line. The blast spores, purchased from Jiangsu Academy of Agricultural Science, Nanjing, China, were injected into the leaf sheaths of emerging panicles. The proportions of diseased grains per panicle were examined three weeks after inoculation based on 11 classes from 0 (no diseased grain) to 10 (100% diseased grain) according to the description of Asaga (1981). The phenotypes for leaf blast resistance were from Table S5.

| Gene ID<br>Corresponding to<br>Nipponbare<br>genome | Transgenic<br>Donor | Transgenic<br>Recipients | Phenotypes of panicle<br>blast test in the natural<br>field |            | Phenotypes of<br>leaf blast test<br>(Resistance blast<br>strains)                                |
|-----------------------------------------------------|---------------------|--------------------------|-------------------------------------------------------------|------------|--------------------------------------------------------------------------------------------------|
|                                                     |                     |                          | Percentage<br>diseased<br>grains                            | Phenotypes |                                                                                                  |
| Os06g15750                                          | TTP                 | SH2                      | 11.7±4.9%                                                   | <b>R</b>   | <b>R</b> (CQ1, HB1, SC2, CQ2, YN1, AH1, JS1, YN2, YN4, B3, 21, 32, YN3, SC3)                     |
| Os12g36730                                          | TTP                 | SH2                      | 7.3±4.2%                                                    | <b>R</b>   | <b>R</b> (CQ1, HB1, LN1, SC2, CQ2, YN1, AH1, JS1, JS2, GD1, SC1, YN2, YN4, B3, 21, 32, YN3, SC3) |
| Os08g01580                                          | GM                  | TP309                    | 9.4±6.4%                                                    | <b>R</b>   | <b>R</b> (CQ1, HB1, YN1, JS2, YN2, 32, 33)                                                       |
| Os08g15880                                          | Q2436               | SH2                      | 12.6±5.5%                                                   | <b>R</b>   | <b>R</b> (CQ1, LN1, CQ2, YN2, SC3, 33)                                                           |
| Os11g35210                                          | TTP                 | SH2                      | 10.7±6.3%                                                   | <b>R</b>   | <b>R</b> (CQ1, CQ2, JS1, JS2)                                                                    |
| Os11g32210                                          | MH63                | TP309                    | 11.7±3.2%                                                   | <b>R</b>   | <b>M</b> (JS2)                                                                                   |
| Os08g19694                                          | TTP                 | SH2                      | 31.7±7.6%                                                   | <b>M</b>   | <b>R</b> (AH1, JS1)                                                                              |
| Os11g45090                                          | TTP                 | TP309                    | 28.6±6.9%                                                   | <b>M</b>   | <b>R</b> (JS2, YN4)                                                                              |
| Os11g45930                                          | Q2436               | TP309                    | 74.3±8.2%                                                   | <b>S</b>   | <b>R</b> (YN1)                                                                                   |
| Os03g63200                                          | GM                  | SH2                      | 78.6±3.7%                                                   | <b>S</b>   | <b>S</b>                                                                                         |
| Os02g27540                                          | TTP                 | SH2                      | 83.4±3.9%                                                   | <b>S</b>   | <b>S</b>                                                                                         |
| Os01g16390                                          | MH63                | TP309                    | 82.1±4.1%                                                   | <b>S</b>   | <b>S</b>                                                                                         |
| Os02g18510                                          | TDK                 | TP309                    | 77.3±6.8%                                                   | <b>S</b>   | <b>S</b>                                                                                         |
| Os02g19750                                          | MH63                | SH2                      | 79.1±4.2%                                                   | <b>S</b>   | <b>S</b>                                                                                         |
| Os11g27430                                          | GM                  | SH2                      | 75.6±8.8%                                                   | <b>S</b>   | <b>S</b>                                                                                         |
| Os03g50150                                          | TTP                 | SH2                      | 82.9±2.6%                                                   | <b>S</b>   | <b>S</b>                                                                                         |
| Os01g21240                                          | TTP                 | SH2                      | 76.4±6.4%                                                   | <b>S</b>   | <b>S</b>                                                                                         |
| Os05g12770                                          | TTP                 | SH2                      | 78.7±6.9%                                                   | <b>S</b>   | <b>S</b>                                                                                         |
| TTP (control)                                       |                     |                          | 4.1±2.4%                                                    | <b>R</b>   | <b>R</b>                                                                                         |
| GM (control)                                        |                     |                          | 5.9±3.6%                                                    | <b>R</b>   | <b>R</b>                                                                                         |
| SH2 (control)                                       |                     |                          | 83.1±3.7%                                                   | <b>S</b>   | <b>S</b>                                                                                         |
| TP309(control)                                      |                     |                          | 84.9±4.2%                                                   | <b>S</b>   | <b>S</b>                                                                                         |

R,Resistance; S, Susceptibility; M, moderate resistance

Reference

Asaga K. (1981) A procedure for evaluating field resistance to blast in rice varieties. J Cent Agri Stn 35:51-138

**Table S8.** Phenotypes of five resistant and two highly susceptible rice cultivars screened by 21 isolates.

| Rice cultivars<br>Isolates | TTP<br>(Donor) | GM2<br>(Donor) | Q2436<br>(Donor) | MH63<br>(Donor) | TDK<br>(Donor) | Shin2<br>(Recipient) | TP309<br>(Recipient) |
|----------------------------|----------------|----------------|------------------|-----------------|----------------|----------------------|----------------------|
| CQ1                        | <i>R</i>       | <i>R</i>       | <i>R</i>         | <i>R</i>        | <i>R</i>       | <i>S</i>             | <i>S</i>             |
| HB1                        | <i>R</i>       | <i>R</i>       | <i>R</i>         | <i>R</i>        | <i>MR</i>      | <i>S</i>             | <i>S</i>             |
| LN1                        | <i>R</i>       | <i>R</i>       | <i>R</i>         | <i>R</i>        | <i>R</i>       | <i>S</i>             | <i>S</i>             |
| SC2                        | <i>R</i>       | <i>R</i>       | <i>R</i>         | <i>R</i>        | <i>R</i>       | <i>S</i>             | <i>S</i>             |
| CQ2                        | <i>R</i>       | <i>R</i>       | <i>R</i>         | <i>R</i>        | <i>R</i>       | <i>S</i>             | <i>S</i>             |
| YN1                        | <i>R</i>       | <i>R</i>       | <i>R</i>         | <i>R</i>        | <i>R</i>       | <i>S</i>             | <i>S</i>             |
| AH1                        | <i>R</i>       | <i>R</i>       | <i>R</i>         | <i>R</i>        | <i>R</i>       | <i>S</i>             | <i>S</i>             |
| JS1                        | <i>R</i>       | <i>R</i>       | <i>R</i>         | <i>MR</i>       | <i>R</i>       | <i>S</i>             | <i>S</i>             |
| JS2                        | <i>R</i>       | <i>R</i>       | <i>R</i>         | <i>R</i>        | <i>R</i>       | <i>S</i>             | <i>S</i>             |
| GD1                        | <i>R</i>       | <i>R</i>       | <i>MR</i>        | <i>R</i>        | <i>MR</i>      | <i>S</i>             | <i>S</i>             |
| SC1                        | <i>R</i>       | <i>R</i>       | <i>R</i>         | <i>R</i>        | <i>R</i>       | <i>S</i>             | <i>S</i>             |
| YN2                        | <i>R</i>       | <i>R</i>       | <i>R</i>         | <i>R</i>        | <i>MR</i>      | <i>S</i>             | <i>S</i>             |
| YN4                        | <i>R</i>       | <i>R</i>       | <i>MR</i>        | <i>R</i>        | <i>R</i>       | <i>S</i>             | <i>S</i>             |
| B3                         | <i>R</i>       | <i>R</i>       | <i>R</i>         | <i>R</i>        | <i>MR</i>      | <i>S</i>             | <i>S</i>             |
| 21                         | <i>R</i>       | <i>R</i>       | <i>R</i>         | <i>MR</i>       | <i>R</i>       | <i>S</i>             | <i>S</i>             |
| 32                         | <i>R</i>       | <i>R</i>       | <i>R</i>         | <i>R</i>        | <i>R</i>       | <i>S</i>             | <i>S</i>             |
| YN3                        | <i>R</i>       | <i>R</i>       | <i>R</i>         | <i>MR</i>       | <i>MR</i>      | <i>S</i>             | <i>S</i>             |
| SC3                        | <i>R</i>       | <i>R</i>       | <i>R</i>         | <i>R</i>        | <i>R</i>       | <i>S</i>             | <i>S</i>             |
| 12-4-2                     | <i>R</i>       | <i>R</i>       | <i>MR</i>        | <i>R</i>        | <i>R</i>       | <i>S</i>             | <i>S</i>             |
| 33                         | <i>R</i>       | <i>R</i>       | <i>R</i>         | <i>R</i>        | <i>R</i>       | <i>S</i>             | <i>S</i>             |
| JS3                        | <i>R</i>       | <i>R</i>       | <i>R</i>         | <i>R</i>        | <i>R</i>       | <i>S</i>             | <i>S</i>             |

The *R* indicates that no evidence of infection was observed on the rice leave; *MR* indicates only brown specks with smaller than 1 mm in diameter but without sporulation on the leave; *S* represents typical spindle-shaped blast lesions with at least 3 mm in diameter on the leave (Fig. S5)

TTP and GM2 are well known resistant lines to rice blast disease. In fact, TTP was identified as a blast *R*-resource 50 years ago by IRRI (Ou and Jennings 1969). Many previous studies have also reported that these two rice cultivars are resistant to most of the pathogenic races of the blast fungus *Magnaporthe grisea* (Barman et al. 2004; Peng et al. 1995; Padmanabhan et al. 1974; Wu et al. 2005). These two plant lines were widely used in breeding program at IRRI and China, for developing high-yielding blast-resistant cultivars due to their durable resistance to broad spectrum disease (Ou 1980; Wu et al. 2007). In addition, a long-term nationwide evaluation of blast resistance of 38,000 rice accessions by 33 Chinese rice research groups showed that TTP and GM2 are highly resistant to rice blast strains in China, whereas Tadukan and MH63 had medium levels of resistance to these pathogens (Peng et al. 1996). These results are consistent with our phenotyping results screened by 21 isolates.

#### Reference

- Barman SR, Gowda M, Venu RC, Chattoo BB. (2004) Identification of a major blast resistance gene in the rice cultivar ‘Tetep’. *Plant Breeding* 123:300–302
- Padmanabhan SY, Mathur SC, Misra RK. (1974) Breeding for blast resistance in India: genetics of blast resistance. *Indian J Genet Plant Breed.* A34, 424–429.
- Peng SQ, Huang FY, Sun GC, Liu EM, Sun YJ, Ai RX, Zhao JX, Bai SZ, Xiao FH (1996) Studies on durable resistance to blast disease in different latitudes for rice (in Chinese with English summary). *Sci Agric Sin* 29:52–58
- Ou SH. (1980) Pathogen variability and host resistance in rice blast disease. *Annu Rev Phytopathol* 18: 167-187
- Ou SH and Jennings PR (1969) Progress in the development of disease-resistant rice. *Annu Rev Phytopathol* 7:383-410
- Wu J, Liu X, Dai L, Wang G. (2007) Advances on the identification 38 characterization of broad-spectrum blast resistance genes in rice (in Chinese with English summary). *Chinese Bulletin of Life Sciences* 19: 233-
- Wu JL, Fan YY, Li DB, Zheng KL, Leung H, Zhuang JY. (2005) Genetic control of rice blast resistance in the durably resistant cultivar Gumei 2 against multiple isolates. *Theor Appl Genet* 111:50-56

**Table S9.** Ten clades identified from the cloned 332 candidate genes which contain significantly more blast *R*-genes relative to that expected based from a random distribution among clades ( $P < 0.05$ ).

In our study, 98 blast *R*-genes, out of 332 cloned genes from 95 selected clades in Supplementary Fig. 1, were identified. In these 95 clades, 25 have five or more cloned genes; we considered this number the minimum necessary for testing whether a clade contains more functional *R*-genes than expected. We randomly assigned a *R* phenotype to 98 genes in the 95 clades and calculated the ‘*R*-gene’ number in each of the 25 clades. This process was repeated 10,000 times to determine a null distribution of ‘*R*-genes’ per clade. When the number of observed *R*-genes (identified *R*-genes) and expected *R*-genes (‘*R*-genes’ by random simulation) were compared for each of 25 clades, 10 clades were identified as significantly different from the null expectation ( $P < 0.05$ ). These clades contain 61 out of 98 identified *R*-genes (62%), suggesting an uneven distribution of blast *R*-genes on the tree of Supplementary Fig. 1 (the clade number in the first column is corresponding to the marked 10 clades in Fig. S1).

| Clades in Supplementary Fig. 1 | Numbers of Genes | Observed <i>R</i> -genes | Expected        |                                      | <i>P</i> value |
|--------------------------------|------------------|--------------------------|-----------------|--------------------------------------|----------------|
|                                |                  |                          | <i>R</i> -genes | Numbers out of the 10,000 iterations |                |
| 1                              | 13               | 7                        | 0               | 123                                  | =0.04          |
|                                |                  |                          | 1               | 647                                  |                |
|                                |                  |                          | 2               | 1555                                 |                |
|                                |                  |                          | 3               | 2362                                 |                |
|                                |                  |                          | 4               | 2333                                 |                |
|                                |                  |                          | 5               | 1687                                 |                |
|                                |                  |                          | 6               | 886                                  |                |
|                                |                  |                          | 7               | 304                                  |                |
|                                |                  |                          | 8               | 84                                   |                |
|                                |                  |                          | 9               | 16                                   |                |
|                                |                  |                          | 10              | 3                                    |                |
|                                |                  |                          | 11              | 0                                    |                |
|                                |                  |                          | 12              | 0                                    |                |
|                                |                  |                          | 13              | 0                                    |                |
| 2                              | 8                | 7                        | 0               | 553                                  | 0.001          |
|                                |                  |                          | 1               | 1937                                 |                |
|                                |                  |                          | 2               | 2956                                 |                |
|                                |                  |                          | 3               | 2590                                 |                |
|                                |                  |                          | 4               | 1387                                 |                |
|                                |                  |                          | 5               | 444                                  |                |
|                                |                  |                          | 6               | 119                                  |                |
|                                |                  |                          | 7               | 13                                   |                |
|                                |                  |                          | 8               | 1                                    |                |
| 3                              | 7                | 5                        | 0               | 730                                  | 0.032          |
|                                |                  |                          | 1               | 2424                                 |                |
|                                |                  |                          | 2               | 3239                                 |                |
|                                |                  |                          | 3               | 2272                                 |                |
|                                |                  |                          | 4               | 1018                                 |                |
|                                |                  |                          | 5               | 274                                  |                |
|                                |                  |                          | 6               | 36                                   |                |
|                                |                  |                          | 7               | 7                                    |                |
| 4                              | 7                | 5                        | 0               | 730                                  | 0.032          |
|                                |                  |                          | 1               | 2424                                 |                |
|                                |                  |                          | 2               | 3239                                 |                |
|                                |                  |                          | 3               | 2272                                 |                |
|                                |                  |                          | 4               | 1018                                 |                |
|                                |                  |                          | 5               | 274                                  |                |
|                                |                  |                          | 6               | 36                                   |                |
|                                |                  |                          | 7               | 7                                    |                |
| 5                              | 6                | 5                        | 0               | 1149                                 | 0.014          |
|                                |                  |                          | 1               | 2992                                 |                |
|                                |                  |                          | 2               | 3232                                 |                |
|                                |                  |                          | 3               | 1883                                 |                |
|                                |                  |                          | 4               | 609                                  |                |
|                                |                  |                          | 5               | 124                                  |                |
|                                |                  |                          | 6               | 11                                   |                |
| 6                              | 22               | 10                       | 0               | 0                                    |                |
|                                |                  |                          | 1               | 41                                   |                |
|                                |                  |                          | 2               | 212                                  |                |
|                                |                  |                          | 3               | 599                                  |                |
|                                |                  |                          | 4               | 1168                                 |                |

|    |   |   |    |      |       |
|----|---|---|----|------|-------|
|    |   |   | 5  | 1681 |       |
|    |   |   | 6  | 1909 |       |
|    |   |   | 7  | 1763 |       |
|    |   |   | 8  | 1297 |       |
|    |   |   | 9  | 743  |       |
|    |   |   | 10 | 378  | 0.05  |
|    |   |   | 11 | 143  |       |
|    |   |   | 12 | 57   |       |
|    |   |   | 13 | 5    |       |
|    |   |   | 14 | 4    |       |
|    |   |   | 15 | 0    |       |
|    |   |   | 16 | 0    |       |
|    |   |   | 17 | 0    |       |
|    |   |   | 18 | 0    |       |
|    |   |   | 19 | 0    |       |
|    |   |   | 20 | 0    |       |
|    |   |   | 21 | 0    |       |
|    |   |   | 22 | 0    |       |
| 7  | 8 | 7 | 0  | 553  |       |
|    |   |   | 1  | 1937 |       |
|    |   |   | 2  | 2956 |       |
|    |   |   | 3  | 2590 |       |
|    |   |   | 4  | 1387 |       |
|    |   |   | 5  | 444  |       |
|    |   |   | 6  | 119  |       |
|    |   |   | 7  | 13   | 0.001 |
|    |   |   | 8  | 1    |       |
| 8  | 8 | 6 | 0  | 553  |       |
|    |   |   | 1  | 1937 |       |
|    |   |   | 2  | 2956 |       |
|    |   |   | 3  | 2590 |       |
|    |   |   | 4  | 1387 |       |
|    |   |   | 5  | 444  |       |
|    |   |   | 6  | 119  | 0.011 |
|    |   |   | 7  | 13   |       |
|    |   |   | 8  | 1    |       |
| 9  | 5 | 4 | 0  | 1626 |       |
|    |   |   | 1  | 3552 |       |
|    |   |   | 2  | 3172 |       |
|    |   |   | 3  | 1316 |       |
|    |   |   | 4  | 310  | 0.033 |
|    |   |   | 5  | 24   |       |
| 10 | 7 | 5 | 0  | 730  |       |
|    |   |   | 1  | 2424 |       |
|    |   |   | 2  | 3239 |       |
|    |   |   | 3  | 2272 |       |
|    |   |   | 4  | 1018 |       |
|    |   |   | 5  | 274  | 0.032 |
|    |   |   | 6  | 36   |       |
|    |   |   | 7  | 7    |       |

**Table S10.** Eight *R*-genes identified from 110 transgenic lines screened independently by one blast isolate at Dr. Pan's lab at South China Agricultural University (50 and 60 lines screened by CHL346 and EL0917, respectively).

| Gene ID  | Transgenic Donor | Transgenic Recipients | Phenotype                                                |                                                                       |
|----------|------------------|-----------------------|----------------------------------------------------------|-----------------------------------------------------------------------|
|          |                  |                       | Screening by only one blast strain in Pan's lab (Strain) | Screening by 12 blast strain in Tian's lab (Strains)                  |
| 06g15750 | TTP              | Shin2                 | <i>R</i> (CHL346)                                        | <i>R</i> (CQ1, HB1, SC2, CQ2, YN1, AH1, JS1, YN2)                     |
| 11g44960 | TTP              | TP309                 | <i>R</i> (CHL346)                                        | <i>R</i> (HB1, YN1, JS2)                                              |
| 05g40150 | Q2436            | TP309                 | <i>R</i> (CHL346)                                        | <i>R</i> (CQ1, CQ2, YN1)                                              |
| 11g35580 | TTP              | TP309                 | <i>R</i> (EL0917)                                        | <i>R</i> (CQ1)                                                        |
| 12g36730 | TTP              | Shin2                 | <i>R</i> (EL0917)                                        | <i>R</i> (CQ1, HB1, LN1, SC2, CQ2, YN1, AH1, JS1, JS2, GD1, SC1, YN2) |
| 06g06380 | TTP              | Shin2                 | <i>R</i> (EL0917)                                        | <i>R</i> (HB1, LN1, SC2, CQ2, YN1, JS1, SC1, YN2)                     |
| 08g10430 | MH63             | Shin2                 | <i>R</i> (EL0917)                                        | <i>S</i>                                                              |
| 08g16460 | TTP              | Shin2                 | <i>R</i> (EL0917)                                        | <i>S</i>                                                              |

*R*, Resistance; *S*, Susceptibility

**Table S11.** Patterns of broadly effective *R*-genes.

| Gene ID  | Clade number in Supplementary Table 9 | Copy number in the same locus of Fig.S1 | Divergence with the least divergent paralog | Transgenic Donor | Transgenic Recipients | Strains resistant to out of 12 |
|----------|---------------------------------------|-----------------------------------------|---------------------------------------------|------------------|-----------------------|--------------------------------|
| 06g06380 | 1                                     | 1                                       | 0.22                                        | TTP              | SH                    | 8                              |
| 06g06390 |                                       | 1                                       | 0.34                                        | TTP              | SH                    | 6                              |
| 06g15750 | /                                     | 1                                       | 0.19                                        | TTP              | SH                    | 8                              |
| 08g01580 | 2                                     | 1                                       | 0.36                                        | GM2              | TP                    | 5                              |
| 08g07340 | 3                                     | 1                                       | 0.15                                        | Q2436            | SH                    | 5                              |
| 08g15880 | Next to 6                             | 1                                       | 0.46                                        | Q2436            | SH                    | 6                              |
|          |                                       |                                         |                                             | GM2              | SH                    | 6                              |
|          |                                       |                                         |                                             | GM2              | TP                    | 8                              |
| 11g44960 | 6                                     | 2                                       | 0.06                                        | TTP              | TP                    | 5                              |
| 11g45190 |                                       | 2-3                                     | 0.01                                        | TTP              | TP                    | 5                              |
| 11g45190 |                                       |                                         |                                             | MH63             | TP                    | 10                             |
| 12g03080 | 7                                     | 1                                       | 0.41                                        | GM2              | SH                    | 7                              |
| 12g32790 | /                                     | 2                                       | 0.01                                        | GM2              | TP                    | 5                              |
| 12g36730 | /                                     | 1                                       | 0.05                                        | TTP              | SH                    | 12                             |
| Ap005316 | /                                     | 1                                       | 0.13                                        | TTP              | TP                    | 5                              |
| 11g06220 | /                                     | 2                                       | 0.03                                        | Q2436            | TP                    | 8                              |

Sixteen *R*-lines (15 *R*-genes and 14 loci from 11 clades) were capable of recognizing five or more isolates. Eight out of these broadly effective *R*-genes are in the clades of Table S9 that contain significantly more blast *R*-genes than expected if functional *R*-genes were randomly distributed among clades. Loci with only a single copy in the genome are denoted as single copy loci; ten of the broadly resistant *R*-genes are identified as single copy loci.

**Table S12.** Co-segregation analysis of the 15 broadly effective *R*-genes during infection of isolates.

| Gene ID<br>Corresponding to<br>Nipponbare<br>genome | Transgenic<br>Donor | Transgenic<br>Recipients | C<br>Q1              | H<br>B1  | LN1                      | S<br>C2              | C<br>Q2              | Y<br>N1  | A<br>H1  | JS<br>1      | JS2              | GD<br>1                  | SC<br>1                  | Y<br>N2              | Total | Cosegregation of<br>resistance<br>(No.-R/N<br>o.-S) |
|-----------------------------------------------------|---------------------|--------------------------|----------------------|----------|--------------------------|----------------------|----------------------|----------|----------|--------------|------------------|--------------------------|--------------------------|----------------------|-------|-----------------------------------------------------|
| 06g06380                                            | TTP                 | SH                       | <i>N</i><br><i>D</i> | <i>R</i> | <i>R</i>                 | <i>R</i>             | <i>R</i>             | <i>R</i> | <i>S</i> | <i>R</i>     | <i>ND</i>        | <i>S</i>                 | <i>R</i>                 | <i>R</i>             |       |                                                     |
|                                                     |                     |                          |                      | 22       | 31                       | $\frac{2}{5}$        | 29                   | 33       |          | 31           |                  |                          | 24                       | 24                   | 219   | 3.13                                                |
|                                                     |                     |                          |                      | 4        | 7                        | $\frac{9}{9}$        | 9                    | 13       |          | 13           |                  |                          | 6                        | 9                    | 70    |                                                     |
| 06g06390                                            | TTP                 | SH                       | <i>R</i>             | <i>R</i> | <i>R</i>                 | <i>S</i>             | <i>S</i>             | <i>S</i> | <i>S</i> | <i>S</i>     | <i>R</i>         | <i>ND</i>                | <i>R</i>                 | <i>R</i>             |       |                                                     |
|                                                     |                     |                          | 29                   | 31       | 21                       |                      |                      |          |          |              | 28               |                          | 33                       | 31                   | 173   | 3.09                                                |
|                                                     |                     |                          | 7                    | 15       | 8                        |                      |                      |          |          |              | 4                |                          | 10                       | 12                   | 56    |                                                     |
| 06g15750                                            | TTP                 | SH                       | <i>R</i>             | <i>R</i> | <i>S</i>                 | <i>R</i>             | <i>R</i>             | <i>R</i> | <i>R</i> | <i>R</i>     | <i>ND</i>        | <i>S</i>                 | <i>S</i>                 | <i>R</i>             |       |                                                     |
|                                                     |                     |                          | 14                   | 36       |                          | $\frac{3}{1}$        | 27                   | 33       | 29       | 36           |                  |                          |                          | 33                   | 239   | 2.78                                                |
|                                                     |                     |                          | 3                    | 12       |                          | $\frac{1}{5}$        | 12                   | 10       | 11       | 9            |                  |                          |                          | 14                   | 86    |                                                     |
| 08g01580                                            | GM2                 | TP                       | <i>R</i>             | <i>R</i> | <i>S</i>                 | <i>N</i><br><i>D</i> | <i>S</i>             | <i>R</i> | <i>S</i> | <i>S</i>     | <i>R</i>         | <i>ND</i>                | <i>ND</i>                | <i>R</i>             |       |                                                     |
|                                                     |                     |                          | 44                   | 26       |                          |                      |                      | 35       |          |              | 28               |                          |                          | 24                   | 157   | 3.57                                                |
|                                                     |                     |                          | 7                    | 5        |                          |                      |                      | 11       |          |              | 14               |                          |                          | 7                    | 44    |                                                     |
| 08g15880                                            | Q243<br>6           | SH                       | <i>R</i>             | <i>S</i> | <i>R</i>                 | <i>S</i>             | <i>R</i>             | <i>S</i> | <i>S</i> | <i>S</i>     | <i>S</i>         | <i>R(S</i><br><i>C3)</i> | <i>R(3</i><br><i>3)</i>  | <i>R</i>             |       |                                                     |
|                                                     |                     |                          | 22                   |          | 34                       |                      | 35                   |          |          |              |                  | 26                       | 29                       | 27                   | 173   | 3.39                                                |
|                                                     |                     |                          | 5                    |          | 12                       |                      | 7                    |          |          |              |                  | 7                        | 9                        | 11                   | 51    |                                                     |
| 08g15880                                            | GM2                 | SH                       | <i>R</i>             | <i>S</i> | <i>S</i>                 | <i>S</i>             | <i>R</i>             | <i>S</i> | <i>S</i> | <i>S</i>     | <i>R(12-4-2)</i> | <i>R(S</i><br><i>C3)</i> | <i>R(J</i><br><i>S3)</i> | <i>R</i>             |       |                                                     |
|                                                     |                     |                          | 38                   |          |                          |                      | 28                   |          |          |              | 25               | 28                       | 31                       | 29                   | 179   | 3.25                                                |
|                                                     |                     |                          | 7                    |          |                          |                      | 11                   |          |          |              | 5                | 9                        | 10                       | 13                   | 55    |                                                     |
| 08g15880                                            | GM2                 | TP                       | <i>R</i>             | <i>S</i> | <i>R(Y</i><br><i>N4)</i> | <i>R</i>             | <i>R</i>             | <i>R</i> | <i>S</i> | <i>S</i>     | <i>R</i>         | <i>R(S</i><br><i>C3)</i> | <i>R(J</i><br><i>S3)</i> | <i>S</i>             |       |                                                     |
|                                                     |                     |                          | 25                   |          | 29                       | $\frac{2}{3}$        | 29                   | 33       |          |              | 24               | 21                       | 24                       |                      | 208   | 2.85                                                |
|                                                     |                     |                          | 11                   |          | 10                       | $\frac{8}{8}$        | 9                    | 10       |          |              | 9                | 7                        | 9                        |                      | 73    |                                                     |
| 11g06220                                            | Q243<br>6           | TP                       | <i>S</i>             | <i>S</i> | <i>R</i>                 | <i>N</i><br><i>D</i> | <i>N</i><br><i>D</i> | <i>R</i> | <i>R</i> | <i>R</i>     | <i>R</i>         | <i>ND</i>                | <i>S</i>                 | <i>N</i><br><i>D</i> |       |                                                     |
|                                                     |                     |                          |                      |          | 27                       |                      |                      | 31       | 35       | 26           | 24               |                          |                          |                      | 143   | 2.86                                                |
|                                                     |                     |                          |                      |          | 8                        |                      |                      | 12       | 11       | 8            | 11               |                          |                          |                      | 50    |                                                     |
| 11g44960                                            | TTP                 | TP                       | <i>S</i>             | <i>R</i> | <i>S</i>                 | <i>S</i>             | <i>S</i>             | <i>R</i> | <i>S</i> | <i>S</i>     | <i>R</i>         | <i>R(S</i><br><i>C3)</i> | <i>R(J</i><br><i>S3)</i> | <i>S</i>             |       |                                                     |
|                                                     |                     |                          |                      | 25       |                          |                      |                      | 29       |          |              | 24               | 36                       | 31                       |                      | 145   | 3.30                                                |
|                                                     |                     |                          |                      | 7        |                          |                      |                      | 6        |          |              | 10               | 11                       | 10                       |                      | 44    |                                                     |
| 11g45190                                            | TTP                 | TP                       | <i>R</i>             | <i>S</i> | <i>R</i>                 | <i>S</i>             | <i>R</i>             | <i>S</i> | <i>S</i> | <i>S</i>     | <i>R(12-4-2)</i> | <i>R(S</i><br><i>C3)</i> | <i>S</i>                 | <i>S</i>             |       |                                                     |
|                                                     |                     |                          | 31                   |          | 28                       |                      | 28                   |          |          |              | 22               | 32                       |                          |                      | 141   | 3.13                                                |
|                                                     |                     |                          | 9                    |          | 10                       |                      | 9                    |          |          |              | 5                | 12                       |                          |                      | 45    |                                                     |
| 11g45190                                            | MH63                | TP                       | <i>S</i>             | <i>R</i> | <i>R</i>                 | <i>R</i>             | <i>R</i>             | <i>R</i> | <i>S</i> | <i>R(33)</i> | <i>R</i>         | <i>R(S</i><br><i>C3)</i> | <i>R(J</i><br><i>S3)</i> | <i>R</i>             |       |                                                     |
